# Supplementary material for: Risk factors and prediction models for recurrent acute ischemic stroke: a retrospective analysis
Source: PeerJ journal article supplement (doi:10.7717/peerj.18605), 2024-11-25
Supplement: codebook.xls [file codebook.xls]

## Sheet: Sheet1
Case Number	Gender	Age	Hospital	First onset 1/Recurrent 2	Onset Date	Onset Time	Admission Date	Admission Time	Discharge Date	Length of Stay (Days)	Outcome (Survived 1/Died 2)	Season of Onset	Subtype	Type of Diagnosis (Infarction 1/Hemorrhage 2/TIA 3)	Hemorrhage Volume (ml)	Follow-up Time	Follow-up Status	Hypertension	Diabetes	Coronary Heart Disease	Atrial Fibrillation	Cerebral Infarction	Cerebral Hemorrhage	Gastrointestinal bleeding	Major Surgery	Head Trauma	Tumor History	Other Medical History	Smoking	Alcohol Consumption	Admission Systolic Pressure	Admission Diastolic Pressure	Heart Rate	Respiration	Oxygen Saturation	Body Temperature	NIHSS Score	Modified Rank	Wada Drinking	Essen	ABCD2	Atrial Fibrillation Score	Rapid Blood Sugar	Cerebral Artery Stenosis	Cerebral Occlusion	Cerebral Sclerosis	Neck Stenosis	Neck Sclerosis	Neck Occlusion
1	Male	72	1	1	2021-06-27	1899-12-31 07:00:00	2021-06-27	1899-12-31 09:10:00	2021-07-06	9	1	Summer Solstice	Large Artery Atherosclerosis Type	1	0	2023-02-18	1	1	0	0	0	0	0	0	0	0	0	0	0	0	127	87	78	20	98	36.5	2	2	1	2	0	0	7.1	1	1	0	0	0	0
2	Male	76	1	1	2021-06-28	1899-12-31	2021-06-28	1899-12-31 05:46:00	2021-07-12	14	1	Summer Solstice	Small Artery Occlusion Type	1	0	2021-08-31	1	1	1	0	0	1	0	0	0	0	0	0	0	0	141	96	85	20	97	36.5	9	4	3	5	0	0	9.6	1	0	0	0	0	0
3	Male	57	2	1	2021-06-28	1899-12-31 14:00:00	2021-06-28	1899-12-31 17:50:00	2021-07-05	7	1	Summer Solstice	Large Artery Atherosclerosis Type	1	0	2023-02-15	1	1	0	0	0	0	0	0	0	0	0	0	0	0	135	92	77	20	99	36.6	10	4	1	2	0	0	8.4	1	0	1	0	0	1
4	Female	85	1	1	2021-06-30	1899-12-31 22:00:00	2021-06-30	1899-12-31 12:57:00	2021-07-12	12	1	Summer Solstice	Large Artery Atherosclerosis Type	1	0	2021-06-30	1	0	0	0	0	0	0	0	0	0	0	0	0	0	142	104	87	13	99	36.5	13	4	3	4	0	0	6.07	1	0	0	0	0	0
5	Female	59	2	1	2021-07-03	1899-12-31 22:30:00	2021-07-03	1899-12-31 22:55:00	2021-10-18	107	1	Summer Solstice	Intracerebral Hemorrhage	2	0	2023-03-07	1	1	0	0	0	0	0	0	0	0	0	0	0	0	221	105	64	25	100	36.5	35				0	0	6.9	0	0	0	0	0	0
6	Female	85	1	2	2021-07-07	1899-12-31 08:00:00	2021-07-07	1899-12-31 08:40:00	2021-07-08	1	2	Summer Solstice	Cerebral Infarction	1	0	2021-07-11	2	1	0	0	0	0	0	0	0	0	0	0	0	0	211	113	74	19	97	36.5	20	5	1		0	0	6.7	0	1	0	0	0	0
7	Male	62	1	1	2021-07-06	1899-12-31 16:00:00	2021-07-07	1899-12-31 07:04:00	2021-07-10	3	1	Summer Solstice	Cerebral Infarction	1	0	2022-09-06	1	0	0	0	0	0	0	0	0	0	0	0	0	0	159	111	81	15	99	36.6	4	2	1	2	0	0	6.1	0	0	1	0	1	0
8	Male	53	2	1	2021-07-07	1899-12-31 11:00:00	2021-07-07	1899-12-31 17:40:00	2021-07-16	9	1	Summer Solstice	Small Artery Occlusion Type	1	0	2021-10-11	1	0	0	0	0	1	0	0	0	0	0	0	0	0	178	88	76	16	100	36.6	6	4	1	2	0	0	8.3	1	0	0	0	1	0
9	Male	77	2	1	2021-07-07	1899-12-31 18:15:00	2021-07-07	1899-12-31 18:48:00	2021-07-15	8	1	Summer Solstice	TIA	1	0	2022-12-07	2	1	0	0	0	0	0	0	0	0	0	0	0	0	176	68	75	16	98	36.6	0			0	4	0	7.5	0	0	0	0	1	0
10	Female	78	1	1	2021-07-08	1899-12-31 17:00:00	2021-07-08	1899-12-31 23:30:00	2021-07-14	6	1	Summer Solstice	Cerebral Infarction	1	0	2022-06-29	1	1	0	1	0	1	0	0	0	0	0	0	0	0	184	91	64	20	100	36.9	7	4	1	4	0	0	9.8	1	0	0	0	0	0
11	Female	81	1	2	2021-07-08	1899-12-31 22:00:00	2021-07-09	1899-12-31 08:05:00	2021-07-19	10	1	Summer Solstice	Cardioembolic Type	1	0	2021-11-12	2	1	1	0	1	1	0	0	0	0	0	0	0	0	152	81	132	24	98	36.8	15	4	1	6	0	8	7.7	1	0	0	0	0	0
12	Male	66	2	1	2021-07-09	1899-12-31 23:30:00	2021-07-10	1899-12-31 00:42:00	2021-08-11	32	1	Summer Solstice	Cerebral Infarction	1	0	2021-12-07	1	0	0	0	0	0	0	0	0	0	0	0	1	1	181	100	91	22	98	36.7	13	2	1		0	0	10.2	1	1	0	0	0	0
13	Male	63	2	1	2021-07-10	1899-12-31 14:30:00	2021-07-10	1899-12-31 16:13:00	2021-07-15	5	1	Summer Solstice	Large Artery Atherosclerosis Type	1	0	2021-07-15	1	1	0	0	0	0	0	0	0	0	1	0	0	0	151	112	88	16	100	36.5	8	4	1		0	0	7.9	1	0	1	0	0	0
14	Male	59	1	1	2021-07-10	1899-12-31 16:00:00	2021-07-10	1899-12-31 23:22:00	2021-07-19	9	1	Minor heat	Lacunar Infarction due to Atherosclerosis	1	0	2021-07-15	1	1	1	0	0	0	0	0	0	0	0	1	1	0	181	100	73	21	95	36.5	6	3	1	2	0	0	9.5	1	0	0	0	0	0
15	Male	61	1	1	2021-07-12	1899-12-31 18:20:00	2021-07-12	1899-12-31 18:44:00	2021-07-20	8	1	Minor heat	Small Artery Occlusion Type	1	0	2023-03-06	1	0	0	0	0	0	0	0	0	0	0	0	0	0	128	77	91	18	99	36.5	1	2	1	1	0	0	5.4	1	0	1	0	0	0
16	Female	64	2	1	2021-07-13	1899-12-31 11:28:00	2021-07-13	1899-12-31 11:53:00	2021-10-04	83	2	Minor heat	Intracerebral Hemorrhage	2	50	2021-10-07	2	1	0	0	0	0	0	0	0	0	0	0	0	0	258	148	85	25	93	36.7	36			0	0	0	8	0	0	0	0	0	0
17	Male	58	2	1	2021-07-13	1899-12-31 04:00:00	2021-07-13	1899-12-31 14:00:00	2021-07-18	5	1	Minor heat	Large Artery Atherosclerosis Type	1	0	2021-07-18	1	0	0	0	0	1	0	0	0	0	0	0	0	0	145	80	95	20	99	36.5	3	3	1	2	0	0	6.3	0	1	0	0	1	0
18	Male	69	1	1	2021-07-16	1899-12-31 05:01:00	2021-07-16	1899-12-31 06:18:00	2021-07-21	5	1	Minor heat	Cerebral Infarction	1	0	2023-03-07	1	1	0	0	0	0	0	0	0	0	0	0	0	0	136	76	182	18	99	36.4	2			3	0	0	10.3	0	0	1	0	1	0
19	Male	58	1	1	2021-07-17	1899-12-31 23:00:00	2021-07-18	1899-12-31 12:29:00	2021-07-23	5	1	Minor heat	Large Artery Atherosclerosis Type	1	0	2021-07-23	1	1	0	0	0	0	0	0	0	0	0	0	0	0	178	103	90	18	100	36.5	14	4	3	1	0	0	9.9	1	0	0	0	0	0
20	Male	63	1	2	2021-07-22	1899-12-31 10:30:00	2021-07-22	1899-12-31 11:53:00	2021-08-01	10	1	Great Heat	Cerebral Infarction	2	0	2022-11-23	1	1	0	0	0	1	0	0	0	0	0	0	0	0	117	80	101	20	98	36.5	4	3	3	4	0	0	8	1	0	0	0	0	0
21	Male	53	1	1	2021-07-22	1899-12-31 19:30:00	2021-07-22	1899-12-31 20:06:00	2021-07-27	5	2	Great Heat	Intracerebral Hemorrhage	2	25	2021-07-26	2	1	0	0	0	0	0	0	0	0	0	0	0	0	230	130	104	6	74	36.5	42			0	0	0	7.8	0	0	0	0	0	0
22	Male	59	2	1	2021-07-23	1899-12-31 19:30:00	2021-07-23	1899-12-31 20:53:00	2021-07-31	8	1	Great Heat	Large Artery Atherosclerosis Type	1	0	2022-08-01	1	0	0	0	0	0	0	0	0	0	0	0	0	0	206	100	87	20	96	36.7	10	4	1	4	0	0	10.7	0	0	0	0	0	0
23	Female	63	2	1	2021-07-23	1899-12-31 23:00:00	2021-07-24	1899-12-31 04:06:00	2021-07-30	6	1	Great Heat	TIA	1	0	2022-12-25	1	0	0	0	0	0	0	0	0	0	0	0	0	0	194	101	78	20	98	36.8	0	2	1	0	0	0	7	1	0	0	0	0	0
24	Male	62	1	1	2021-07-25	1899-12-31 22:00:00	2021-07-26	1899-12-31 13:35:00	2021-07-30	4	1	Great Heat	Cerebral Infarction	1	0	2023-02-13	1	1	0	1	0	0	0	0	0	0	0	0	0	0	141	94	92	21	99	36.5	7	2	2	0	0	0	8	1	0	0	0	1	0
25	Female	61	1	1	2021-07-26	1899-12-31 09:30:00	2021-07-26	1899-12-31 11:35:00	2021-07-30	4	1	Great Heat	TIA	1	0	2021-07-26	1	1	0	0	0	0	0	0	0	0	0	0	0	0	124	75	65	20	97	36.7	0	2	1	0	5	0	7.7	0	0	0	0	0	0
26	Male	76	1	1	2021-07-26	1899-12-31 19:00:00	2021-07-26	1899-12-31 23:00:00	2021-08-03	8	1	Great Heat	Cerebral Infarction	1	0	2022-03-03	1	1	1	1	0	1	0	0	0	0	0	0	0	0	163	90	67	21	97	36.7	9	3	1	6	0	0	5.9	1	0	0	0	1	0
27	Female	73	2	1	2021-07-28	1899-12-31 20:30:00	2021-07-28	1899-12-31 21:40:00	2021-08-10	13	1	Great Heat	Large Artery Atherosclerosis Type	1	0	2023-02-23	1	1	1	0	0	0	0	0	0	0	0	0	0	0	159	78	104	20	98	36.7	6	4	1	4	0	0	10.9	0	0	0	0	1	0
28	Male	51	2	1	2021-07-28	1899-12-31 21:52:00	2021-07-28	1899-12-31 22:50:00	2021-08-03	6	1	Great Heat	Small Artery Occlusion Type	1	0	2022-04-13	1	0	1	0	0	0	0	0	0	0	0	0	0	0	125	78	90	17	98	36.6	2	2	1	0	0	0	17.9	0	0	0	0	0	0
29	Female	72	2	1	2021-07-29	1899-12-31 08:00:00	2021-07-29	1899-12-31 12:04:00	2021-08-16	18	1	Great Heat	Large Artery Atherosclerosis Type	1	0	2023-03-10	1	1	1	0	0	1	0	0	0	0	0	0	0	0	150	97	124	24	99	37.5	11	4	4	4	0	0	7.2	1	1	1	0	1	0
30	Female	80	1	1	2021-07-29	1899-12-31 10:00:00	2021-07-30	1899-12-31 02:24:00	2021-08-06	7	1	Great Heat	Cerebral Infarction	1	0	2021-09-15	1	1	1	0	0	0	0	0	0	0	0	0	0	0	134	61	77	20	99	36.3	11	4	3	4	0	0	7.8	1	0	0	0	0	0
31	Male	74	1	1	2021-07-31	1899-12-31 08:10:00	2021-07-31	1899-12-31 10:00:00	2021-08-08	8	1	Great Heat	TIA	1	0	2021-09-06	1	1	1	1	0	0	0	0	0	0	0	0	0	0	173	91	81	18	99	36.3			1	5	5	0	10.3	1	0	1	1	1	0
32	Male	31	1	1	2021-06-15	1899-12-31 17:00:00	2021-06-15	1899-12-31 18:40:00	2021-06-21	6	1	Grain in ear	Lacunar Infarction due to Atherosclerosis	1	0	2022-09-29	1	1	0	0	0	0	0	0	0	0	0	0	0	0	165	92	101	20	97	36.2	5	3	1	1	0	0	7.4	1	0	0	0	0	0
33	Female	69	1	1	2021-06-15	1899-12-31 09:30:00	2021-06-15	1899-12-31 13:05:00	2021-06-25	10	1	Grain in ear	Large Artery Atherosclerosis Type	1	0	2023-03-02	1	1	0	0	1	0	0	0	0	0	0	0	0	0	141	75	120	16	99	36.6	5	3	1	3	0	0	7.3	1	0	0	0	1	0
34	Male	65	2	2	2021-06-17	1899-12-31 17:00:00	2021-06-17	1899-12-31 21:01:00	2021-06-20	3	1	Grain in ear	Small Artery Occlusion Type	1	0	2022-11-09	1	1	1	0	0	0	0	0	0	0	0	0	0	0	137	76				36.6	2	2	1		0	0	0	1	0	0	0	0	0
35	Male	66	2	1	2021-06-18	1899-12-31 07:30:00	2021-06-18	1899-12-31 08:24:00	2021-06-28	10	1	Grain in ear	Large Artery Atherosclerosis Type	1	0	2022-01-26	2	1	1	0	0	0	0	0	0	0	0	1	0	0	124	86	82	17	100	36.5	3	4	3	5	0	0	10.2	1	0	0	0	0	0
36	Male	60	1	1	2021-06-18	1899-12-31 21:40:00	2021-06-18	1899-12-31 22:39:00	2021-06-24	6	1	Grain in ear	Cerebral Infarction	1	0	2021-06-24	1	0	0	0	0	0	0	0	0	0	0	0	1	0	109	64	60	20	98	36.1	8	4	2		0	0	6.7	0	0	0	0	1	0
37	Male	78	1	1	2021-06-21	1899-12-31 11:00:00	2021-06-21	1899-12-31 19:30:00	2021-07-06	15	1	Summer Solstice	Large Artery Atherosclerosis Type	1	0	2021-07-26	1	0	0	0	0	0	0	0	0	0	0	0	1	1	163	94	77	16	100	37	15	5	2	3	0	0	7.7	1	0	0	0	0	0
38	Male	77	1	1	2021-06-21	1899-12-31 19:20:00	2021-06-21	1899-12-31 20:27:00	2021-06-26	5	1	Summer Solstice	Large Artery Atherosclerosis Type	1	0	2022-09-29	1	1	0	1	0	0	0	0	0	0	0	1	0	0	177	98	82	20	99	36.2	5	4	1	5	0	0	8.5	1	0	0	0	1	0
39	Male	59	1	1	2021-06-21	1899-12-31 18:00:00	2021-06-21	1899-12-31 19:46:00	2021-06-28	7	1	Summer Solstice	Large Artery Atherosclerosis Type	1	0	2023-03-02	1	0	1	0	0	0	0	0	0	0	0	0	0	1	103	69	80	15	99	36.7	5	3	1	1	0	0	9.5	1	0	0	0	0	0
40	Male	70	1	1	2021-06-24	1899-12-31 18:04:00	2021-06-24	1899-12-31 18:34:00	2021-07-04	10	1	Summer Solstice	Large Artery Atherosclerosis Type	1	0	2022-06-24	1	0	0	0	0	0	0	0	0	0	0	0	0	0	176	111	86	16	98	36.7	4	3	1	1	0	0	7.8	1	0	0	0	1	0
41	Male	80	2	1	2021-06-25	1899-12-31 06:00:00	2021-06-26	1899-12-31 07:50:00	2021-07-07	11	1	Summer Solstice	Large Artery Atherosclerosis Type	1	0	2022-07-14	1	0	1	1	0	1	0	0	0	0	0	0	0	0	162	75	77	20	98	37	2	3	1	5	0	0	25	1	0	0	0	0	0
42	Male	62	1	1	2021-06-26	1899-12-31 08:00:00	2021-06-26	1899-12-31 10:42:00	2021-07-08	12	1	Summer Solstice	Large Artery Atherosclerosis Type	1	0	2023-03-06	1	1	0	0	0	0	0	0	0	0	0	0	1	1	160	89	78	19	98	36.3	4	2	1	2	0	0	5.7	1	0	0	0	1	0
43	Female	65	2	1	2021-06-26	1899-12-31 05:00:00	2021-06-26	1899-12-31 11:36:00	2021-07-05	9	1	Summer Solstice	Cardioembolic Type	1	0	2021-07-19	1	1	1	0	1	1	0	0	0	0	0	0	0	0	164	88	118	16	99	36.1	19	5	5	5	0	6	6.9	1	0	0	0	0	0
44	Male	48	1	1	2021-06-01	1899-12-31 15:00:00	2021-06-01	1899-12-31 16:20:00	2021-06-08	7	1	Grain Buds	Large Artery Atherosclerosis Type	1	0	2023-02-17	1	1	0	0	0	0	0	0	0	0	0	0	1	1	151	85	160	16	99	36.7	4	4	1	2	0	0	8.5	1	0	0	0	0	0
45	Female	60	2	1	2021-06-01	1899-12-31 12:14:00	2021-06-01	1899-12-31 17:14:00	2021-06-10	9	1	Grain Buds	Large Artery Atherosclerosis Type	1	0	2021-06-10	1	1	0	0	0	1	1	0	0	0	0	0	0	0	182	85	88	20	99	36.1	4	3	1	2	0	0	4.4	1	0	0	0	0	0
46	Female	66	2	1	2021-06-03	1899-12-31 21:00:00	2021-06-04	1899-12-31 05:59:00	2021-06-21	17	1	Grain Buds	Cerebral Infarction	1	0	2021-06-21	1	1	0	0	0	0	0	0	0	0	0	0	0	0	125	68	115	20		36.5	18	5	5		0	0		0	0	0	0	0	0
47	Male	58	1	1	2021-06-05	1899-12-31 18:35:00	2021-06-06	1899-12-31 06:35:00	2021-06-17	11	1	Grain in ear	Cerebral Infarction	1	0	2021-07-30	1	0	0	0	0	0	0	0	0	0	0	0	0	0	126	92	78	20	99	36.2	1	1	1	1	0	0	7.2	1	0	0	0	1	0
48	Male	74	1	2	2021-06-05	1899-12-31 22:09:00	2021-06-06	1899-12-31 07:09:00	2021-07-02	26	1	Grain in ear	Cardioembolic Type	1	0	2021-12-10	1	1	0	0	1	1	0	0	0	0	0	0	0	0	122	94	120	15	100	36.2	21	5	5	3	0	5	5.9	1	0	0	0	0	0
49	Male	64	2	1	2021-06-06	1899-12-31 19:00:00	2021-06-06	1899-12-31 19:43:00	2021-06-19	13	1	Grain in ear	Lacunar Infarction due to Atherosclerosis	1	0	2023-02-28	1	1	0	0	0	1	0	0	0	0	0	1	0	0	164	85	63	20	99	37	4	1	1	3	0	0	8.3	1	0	0	0	0	0
50	Female	71	2	1	2021-06-06	1899-12-31 19:00:00	2021-06-07	1899-12-31 00:58:00	2021-06-10	3	1	Grain in ear	Large Artery Atherosclerosis Type	1	0	2021-06-10	1	1	1	0	0	0	0	0	0	0	0	0	0	0	172	80	89	24	99	36.7	8	4	1	3	0	0	11.9	1	0	0	0	0	0
51	Male	74	1	2	2021-06-07	1899-12-31 11:00:00	2021-06-07	1899-12-31 17:40:00	2021-06-09	2	1	Grain in ear	Cerebral Infarction	1	0	2021-06-09	1	1	1	0	0	1	0	0	0	0	0	0	1	0	182	84	78	17	99	36.7	2	3	4	6	0	0	10.4	1	0	0	0	0	0
52	Male	65	1	1	2021-06-11	1899-12-31 17:30:00	2021-06-12	1899-12-31 03:14:00	2021-06-18	6	1	Grain in ear	Large Artery Atherosclerosis Type	1	0	2023-02-20	1	0	0	0	0	1	0	0	0	0	0	0	1	0	134	74	78	18	98	36.4	1	2	1	2	0	0	6.4	1	0	1	0	1	0
53	Female	60	1	1	2021-06-12	1899-12-31	2021-06-12	1899-12-31 11:37:00	2021-06-30	18	1	Grain in ear	Large Artery Atherosclerosis Type	1	0	2022-12-06	1	0	0	0	0	0	0	0	0	0	0	0	0	0	151	82		18	96	36.7	7	4	1		0	0	9.5	1	1	0	0	1	0
54	Male	61	1	1	2021-06-12	1899-12-31 16:20:00	2021-06-12	1899-12-31 21:14:00	2021-07-12	30	1	Grain in ear	Large Artery Atherosclerosis Type	1	0	2021-07-12	1	0	0	0	0	0	0	0	0	0	0	1	0	0	153	92	73	22	98	36.6	16	5	5		0	0	6.5	1	1	0	0	0	0
55	Male	77	2	1	2021-06-12	1899-12-31 17:30:00	2021-06-12	1899-12-31 22:33:00	2021-06-24	12	1	Grain in ear	Cerebral Infarction	1	0	2021-10-19	1	1	0	0	0	0	0	0	0	0	0	0	0	0	122	62	59	20	98	36.4	6	4	5		0	0	17.7	1	0	0	0	0	1
56	Male	57	1	1	2021-05-15	1899-12-31 20:00:00	2021-05-16	1899-12-31 10:56:00	2021-05-24	8	1	Beginning of Summer	Large Artery Atherosclerosis Type	1	0	2022-03-05	1	0	0	0	0	0	0	0	0	0	0	0	0	0	166	92	71	18	98	36.7	6	2	1		0	0	7.2	0	0	0	0	0	0
57	Female	66	2	1	2021-05-15	1899-12-31 15:20:00	2021-05-16	1899-12-31 09:33:00	2021-05-24	8	1	Beginning of Summer	Large Artery Atherosclerosis Type	1	0	2023-01-31	1	1	1	0	0	0	0	0	0	0	0	0	0	0	220	80	86	17	99	36.5	10	5	1	3	0	0	10.5	1	1	0	0	0	0
58	Male	66	2	1	2021-05-15	1899-12-31 23:00:00	2021-05-16	1899-12-31 11:20:00	2021-05-17	1	1	Beginning of Summer	Intracerebral Hemorrhage	2	0	2021-05-17	1	0	0	1	0	0	0	0	0	0	0	0	0	0	147	76	84	24	98	36.6					0	0	7.9	0	0	0	0	0	0
59	Female	60	1	1	2021-05-18	1899-12-31 08:00:00	2021-05-18	1899-12-31 09:40:00	2021-05-24	6	1	Beginning of Summer	Cerebral Infarction	1	0	2023-02-15	1	1	0	0	0	0	0	0	0	0	0	0	1	0	174	89	97	18	99	36.8	10	4	1	2	0	0	8.4	1	1	0	0	0	0
60	Female	66	1	1	2021-05-21	1899-12-31 13:30:00	2021-05-21	1899-12-31 15:05:00	2021-05-28	7	1	Grain Buds	Cerebral Infarction	1	0	2021-05-28	1	1	0	0	0	1	0	0	0	0	0	0	0	0	188	78	75	20	95	37.2	4	3	1		0	0	7.7	0	0	0	0	0	0
61	Male	62	2	1	2021-05-20	1899-12-31 21:00:00	2021-05-21	1899-12-31 21:20:00	2021-06-11	21	1	Grain Buds	Large Artery Atherosclerosis Type	1	0	2021-06-11	1	1	0	0	0	0	0	0	0	0	0	0	1	0	173	117	75	21	100	37.1	20	5	3	8	0	0	7.2	0	1	1	0	1	0
62	Female	66	1	1	2021-05-20	1899-12-31 23:00:00	2021-05-21	1899-12-31 09:00:00	2021-05-26	5	1	Grain in ear	Small Artery Occlusion Type	2	0	2021-06-19	1	1	0	1	0	0	1	0	0	0	0	0	0	0	147	79	72	19	97	36.7	5	3	1	5	0	0	6.5	0	0	0	0	1	0
63	Male	66	2	1	2021-05-23	1899-12-31 02:00:00	2021-05-23	1899-12-31 10:33:00	2021-05-31	8	1	Grain Buds	Cerebral Infarction	1	0	2022-08-23	1	1	0	0	0	0	0	0	0	0	0	0	0	0	216	112	80	19	97	36.6	5	3	3	2	0	0	5.8	1	0	0	0	1	0
64	Female	65	2	1	2021-05-25	1899-12-31 16:00:00	2021-05-26	1899-12-31 00:18:00	2021-06-02	7	1	Grain Buds	Large Artery Atherosclerosis Type	1	0	2022-12-19	1	1	0	0	0	0	1	0	0	0	0	0	0	0	177	110	80	20	99	36.3	8	4			0	0	7	1	0	1	1	0	0
65	Male	49	1	1	2021-05-25	1899-12-31 23:00:00	2021-05-26	1899-12-31 05:00:00	2021-06-08	13	1	Grain Buds	Large Artery Atherosclerosis Type	1	0	2021-06-08	1	0	0	0	0	0	0	0	0	0	0	0	1	0	157	91	84	15	97	36.5	3	3	1	2	0	0	17.4	1	0	0	0	0	0
66	Male	55	2	1	2021-05-29	1899-12-31 16:40:00	2021-05-29	1899-12-31 19:32:00	2021-06-04	6	1	Grain Buds	Large Artery Atherosclerosis Type	1	0	2021-06-04	1	0	0	0	0	0	0	0	0	0	0	1	0	0	190	80	82	24	100	36.8	7	3	2	2	0	0	6.9	1	1	0	0	0	0
67	Female	51	1	1	2021-05-12	1899-12-31 15:30:00	2021-05-13	1899-12-31 01:10:00	2021-05-19	6	1	Beginning of Summer	Cerebral Infarction	1	0	2021-05-19	1	1	0	0	0	0	0	0	0	0	0	1	0	0	181	99	68	20	99	36.5	3	2	1	1	0	0	9.1	1	0	0	0	1	0
68	Female	77	1	1	2021-05-13	1899-12-31 20:30:00	2021-05-13	1899-12-31 22:10:00	2021-05-15	2	1	Beginning of Summer	Cerebral Infarction	1	0	2023-01-31	1	0	0	0	0	0	0	0	0	0	0	1	0	0	143	88	102	23	100	36.6	2	1	1	2	0	0	7.4	0	0	0	0	1	0
69	Female	57	2	1	2021-05-12	1899-12-31 07:00:00	2021-05-12	1899-12-31 21:25:00	2021-05-31	19	1	Beginning of Summer	Cerebral Infarction	1	0	2021-10-12	1	1	0	0	0	0	0	0	0	0	0	1	0	0	189	123	77	17	98	36.7	2	1	1	1	0	0	8.2	0	0	1	0	1	0
70	Female	72	2	1	2021-05-11	1899-12-31 11:30:00	2021-05-11	1899-12-31 13:45:00	2021-05-21	10	1	Beginning of Summer	Large Artery Atherosclerosis Type	1	0	2021-09-02	1	0	1	0	0	0	0	0	0	0	0	0	0	0	138	77	80	20	98	36.7	12	4	3	2	0	0	11.8	1	1	0	0	0	0
71	Female	79	1	1	2021-05-11	1899-12-31 05:38:00	2021-05-11	1899-12-31 11:38:00	2021-05-17	6	1	Beginning of Summer	Cerebral Infarction	1	0	2021-05-17	1	0	0	0	0	1	0	0	0	0	0	0	0	0	160	86	75	20	98	36.2	0	0	1	2	0	0	6	1	0	0	0	1	0
72	Female	58	1	1	2021-05-11	1899-12-31 06:32:00	2021-05-11	1899-12-31 09:02:00	2021-05-19	8	1	Beginning of Summer	Small Artery Occlusion Type	1	0	2022-09-07	1	0	0	0	0	0	0	0	0	0	0	0	0	0	126	84	78	21	99	36.3	7	2	3	0	0	0	14.9	1	0	0	0	0	0
73	Female	83	1	1	2021-05-09	1899-12-31 02:00:00	2021-05-09	1899-12-31 08:58:00	2021-05-16	7	1	Beginning of Summer	Large Artery Atherosclerosis Type	1	0	2023-09-07	1	1	1	0	0	1	0	0	0	0	0	0	0	0	186	83	82	15	99	36.6	6	4	2	5	0	0	10.7	1	0	0	0	0	0
74	Male	53	2	1	2021-05-06	1899-12-31 15:00:00	2021-05-06	1899-12-31 19:00:00	2021-05-11	5	1	Beginning of Summer	TIA	1	0	2023-03-05	1	0	0	0	0	0	0	0	0	0	0	1	0	0	164	100	107	22	98	37	0	0	1	0	0	0	7	0	0	1	0	0	0
75	Female	81	1	2	2021-05-05	1899-12-31 11:00:00	2021-05-05	1899-12-31 18:31:00	2021-05-14	9	1	Beginning of Summer	Cardioembolic Type	1	0	2021-05-26	1	1	0	0	1	1	0	0	0	0	0	0	0	0	168	98	122	21	99	36.3	16	5	3	4	0	6	7.3	1	1	1	0	0	0
76	Female	70	1	1	2021-05-04	1899-12-31 17:28:00	2021-05-04	1899-12-31 20:28:00	2021-05-14	10	1	Grain Rain	Intracerebral Hemorrhage	2	0.8	2023-03-14	1	0	1	0	0	0	0	0	0	0	0	0	0	0	181	98	95	17	97	36.9					0	0	20.4	0	0	0	0	1	0
77	Female	81	1	1	2021-05-04	1899-12-31 13:30:00	2021-05-04	1899-12-31 19:07:00	2021-05-10	6	1	Grain Rain	Large Artery Atherosclerosis Type	1	0	2021-05-10	1	1	0	0	0	1	0	0	0	0	0	0	0	0	155	74	64	17	99	36.5	5	3	1	5	0	0	5.8	1	0	0	0	1	0
78	Female	69	2	1	2021-05-02	1899-12-31 08:30:00	2021-05-02	1899-12-31 09:47:00	2021-05-10	8	1	Grain Rain	Large Artery Atherosclerosis Type	1	0	2022-04-20	1	1	0	0	0	0	0	0	0	0	0	1	0	0	176	86	96	20	96	36.5	5	3	2	3	0	0	6.6	0	0	1	0	0	0
79	Male	60	2	1	2021-05-01	1899-12-31 19:00:00	2021-05-01	1899-12-31 22:26:00	2021-05-10	9	1	Grain Rain	Cerebral Infarction	1	0	2022-10-09	1	1	0	1	0	0	0	0	0	0	0	0	1	0	138	80	83	17	99	36.7	0	1	1	3	0	0	8.3	1	0	1	0	1	0
80	Male	81	1	2	2021-04-28	1899-12-31 22:00:00	2021-04-29	1899-12-31 02:20:00	2021-05-17	18	1	Grain Rain	Large Artery Atherosclerosis Type	1	0	2021-05-16	1	1		1	1	1	0	0	0	0	0	0	0	0	138	80	80	20	99	36.8	18	5	5	6	0	0	8.8	1	0	0	0	0	0
81	Male	51	1	1	2021-04-26	1899-12-31 20:00:00	2021-04-28	1899-12-31 11:53:00	2021-05-14	16	1	Grain Rain	Intracerebral Hemorrhage	1	0	2021-12-30	1	0	0	0	0	0	0	0	0	0	0	0	0	0	191	115	117	20	100	36.5					0	0	7.8	0	0	0	0	0	0
82	Male	56	1	1	2021-04-28	1899-12-31 15:20:00	2021-04-28	1899-12-31 20:02:00	2021-05-08	10	1	Grain Rain	Small Artery Occlusion Type	1	0	2021-11-16	1	1	1	1	0	0	0	0	0	0	0	0	1	0	133	98	92	20	100	36.8	2	2	1	3	0	0	17.6	1	0	0	0	0	0
83	Male	71	2	1	2021-04-25	1899-12-31 20:00:00	2021-04-26	1899-12-31 03:05:00	2021-05-01	5	1	Grain Rain	Small Artery Occlusion Type	1	0	2021-05-31	1	1	0	0	0	0	0	0	0	0	0	1	1	0	153	82	108	19	99	36.7	4	2	1	4	0	0	10.3	0	0	0	0	0	0
84	Female	61	2	1	2021-04-25	1899-12-31 19:30:00	2021-04-26	1899-12-31 00:52:00	2021-05-13	17	1	Grain Rain	Cerebral Infarction	1	0	2021-05-13	1	0	0	0	0	0	0	0	0	0	0	1	0	0	154	90	56	9	95	35	32	5	5	0	0	0	5.9	0	0	0	0	0	0
85	Male	59	1	1	2021-04-23	1899-12-31 09:00:00	2021-04-24	1899-12-31 01:10:00	2021-04-30	6	1	Grain Rain	Cerebral Infarction	1	0	2022-07-18	1	0	0	0	0	0	0	0	0	0	0	0	0	0	138	42	98	24	98	36.8	4	2	1	1	0	0	6.5	1	0	0	0	1	0
86	Male	65	1	1	2021-04-23	1899-12-31 14:10:00	2021-04-23	1899-12-31 17:57:00	2021-05-19	26	1	Grain Rain	Large Artery Atherosclerosis Type	1	0	2021-05-19	1	0	0	0	0	0	0	0	0	0	0	1	1	0	163	79	105	24	97	36.7	21	5	5	2	0	0	8.5	0	0	0	0	0	0
87	Male	52	2	1	2021-04-23	1899-12-31 11:30:00	2021-04-23	1899-12-31 12:35:00	2021-04-30	7	1	Grain Rain	Large Artery Atherosclerosis Type	1	0	2021-04-30	1	0	0	0	0	0	0	0	0	0	0	0	1	1	170	90	78	21	99	36.3	6	4	3	2	0	0	9.4	0	0	1	0	1	0
88	Female	83	1	2	2021-04-23	1899-12-31 04:00:00	2021-04-23	1899-12-31 09:59:00	2021-04-24	1	1	Grain Rain	Large Artery Atherosclerosis Type	1	0	2023-01-03	2	1	0	1	1	1	0	0	1	0	0	0	0	0	141	73	69	17	98	36	4	4	2	5	0	0	8	1	0	1	0	1	0
89	Male	81	2	1	2021-04-22	1899-12-31 04:00:00	2021-04-22	1899-12-31 05:07:00	2021-04-28	6	1	Grain Rain	Cerebral Infarction	1	0	2021-05-16	1	1	0	1	1	0	0	0	0	0	0	0	0	0	138	61	67	20	99	36.2	5	2	1	5	0	0	7.8	1	0	1	0	0	0
90	Male	68	1	1	2021-04-20	1899-12-31 19:00:00	2021-04-21	1899-12-31 01:55:00	2021-04-24	3	1	Grain Rain	Large Artery Atherosclerosis Type	1	0	2021-05-12	1	1	0	0	0	0	0	0	0	0	0	0	0	0	129	60	85	17	98	36.5	8	4	1	2	0	0	7.9	0	0	1	0	1	0
91	Female	67	2	1	2021-04-21	1899-12-31 16:30:00	2021-04-21	1899-12-31 20:15:00	2021-04-30	9	1	Grain Rain	Cerebral Infarction	1	0	2022-07-19	1	1	0	0	0	1	0	0	0	0	0	0	0	0	182	98	82	24	99	36.6	3	2	1	4	0	0	24.1	0	0	0	0	0	0
92	Female	77	2	1	2021-04-20	1899-12-31 10:06:00	2021-04-20	1899-12-31 14:11:00	2021-05-06	16	1	Qingming	Large Artery Atherosclerosis Type	1	0	2021-05-06	1	1	0	0	0	1	0	0	0	0	0	0	0	0	172	80	84	21	99	36.8	19	5	5	5	0	0	10	1	1	1	0	0	0
93	Female	84	1	1	2021-04-19	1899-12-31 15:10:00	2021-04-19	1899-12-31 20:25:00	2021-04-27	8	1	Qingming	Large Artery Atherosclerosis Type	1	0	2021-10-19	1	1	1	0	0	1	0	0	0	0	0	0	0	0	167	89	68	20	98	36.7	2	3	1	5	0	0	12.1	1	0	0	0	1	0
94	Female	85	1	1	2021-04-18	1899-12-31 12:00:00	2021-04-18	1899-12-31 17:48:00	2021-04-28	10	1	Qingming	Large Artery Atherosclerosis Type	1	0	2021-04-28	1	1	0	1	0	1	0	0	0	0	0	1	0	0	138	82	62	20	99	36.3	7	4	4	5	0	0	10	1	0	0	0	1	0
95	Female	71	2	1	2021-04-18	1899-12-31 09:30:00	2021-04-18	1899-12-31 14:07:00	2021-04-25	7	1	Qingming	Cerebral Infarction	1	0	2021-06-02	1	1	0	0	0	1	0	0	0	0	0	1	0	0	193	81	72	20	100	36.7	4	4	1	2	0	0	12.4	1	0	0	0	1	0
96	Male	71	2	1	2021-04-15	1899-12-31 14:20:00	2021-04-15	1899-12-31 14:56:00	2021-04-20	5	1	Qingming	Cerebral Infarction	1	0	2022-09-27	1	0	0	0	0	1	0	0	0	0	0	0	0	0	122	71	95	20	90	36.4	1	2	1		0	0	7.6	1	0	0	0	0	0
97	Male	49	2	1	2021-04-15	1899-12-31 10:00:00	2021-04-15	1899-12-31 12:14:00	2021-04-28	13	1	Qingming	Cerebral Infarction	2	0	2021-05-19	1	1	0	0	0	0	0	0	0	0	0	0	0	0	208	137	81	15	97	36.4		5	3		0	0	9.5	0	0	0	0	0	0
98	Male	74	2	1	2021-04-15	1899-12-31	2021-04-15	1899-12-31 03:34:00	2021-04-23	8	1	Qingming	Cerebral Infarction	1	0	2022-12-06	1	1	0	0	0	0	0	0	0	0	0	1	0	0	159	97	107	19	100	36.4	8	4	1	2	0	0	5.7	1	0	0	0	0	0
99	Male	67	2	1	2021-04-14	1899-12-31 09:35:00	2021-04-14	1899-12-31 10:11:00	2021-04-20	6	1	Qingming	Large Artery Atherosclerosis Type	1	0	2023-01-09	1	0	0	0	0	1	0	0	0	0	0	1	0	0	169	95	67	12	99	36.2	4	3	1	3	0	0	7.2	0	1	1	0	0	0
100	Male	77	1	1	2021-04-14	1899-12-31 12:10:00	2021-04-14	1899-12-31 20:42:00	2021-04-22	8	1	Qingming	TIA	1	0	2021-04-22	1	0	1	0	0	1	0	0	0	0	0	0	0	0	149	77	94	20	99	36.1				5	6	0	8.6	1	0	0	0	1	0
101	Male	69	1	2	2021-04-14	1899-12-31 16:30:00	2021-04-14	1899-12-31 19:10:00	2021-04-30	16	1	Qingming	Cerebral Infarction	1	0	2022-07-22	1	1	1	0	1	1	0	0	0	0	0	0	0	1	240	110	100	17	99	36	2	4	1	4	0	0	14.2	1	0	1	0	1	1
102	Male	67	2	2	2021-04-14	1899-12-31 08:00:00	2021-04-14	1899-12-31 21:33:00	2021-04-28	14	1	Qingming	Large Artery Atherosclerosis Type	1	0	2022-03-13	1	1	1	0	0	0	0	1	1	0	0	0	1	0	170	70	66	20	98	36.7	5	4	1	3	0	0	8.7	1	0	0	0	1	0
103	Male	54	2	1	2021-04-13	1899-12-31 18:38:00	2021-04-13	1899-12-31 19:07:00	2021-05-06	23	1	Qingming	Intracerebral Hemorrhage	2	87	2023-03-16	1	0	0	0	0	1	0	0	0	0	0	0	0	0	208	116	98	19	95	36.2					0	0	8.5	1	0	0	0	1	0
104	Male	85	1	1	2021-04-13	1899-12-31 10:00:00	2021-04-13	1899-12-31 13:38:00	2021-04-26	13	1	Qingming	Cardioembolic Type	1	0	2023-01-24	2	0	0	0	0	0	0	0	0	0	0	1	0	0	138	80	80	20	98	36.8	0	1	1	2	0	5	5.4	1	0	1	0	1	0
105	Female	70	2	1	2021-04-12	1899-12-31 15:00:00	2021-04-12	1899-12-31 18:07:00	2021-04-26	14	1	Qingming	Intracerebral Hemorrhage	2	6	2021-04-26	1	1	0	0	0	0	0	0	0	0	0	0	0	0	164	87	93	20	96	36.7					0	0	8	0	0	0	0	0	0
106	Male	68	1	1	2021-04-10	1899-12-31 01:00:00	2021-04-10	1899-12-31 10:14:00	2021-04-20	10	1	Qingming	Cerebral Infarction	1	0	2022-06-20	1	1	0	0	0	0	0	0	0	0	0	0	0	0	174	96	78	20	98	36.3	3	2	1	3	0	0	9.6	1	0	0	0	0	0
107	Male	54	1	1	2021-04-09	1899-12-31 21:20:00	2021-04-09	1899-12-31 22:15:00	2021-04-29	20	1	Qingming	Intracerebral Hemorrhage	2	0	2021-04-29	1	1	1	0	0	0	0	0	0	0	0	0	0	0	177	102	98	20	98	36.7					0	0	14.9	0	0	0	0	0	0
108	Male	66	2	2	2021-04-08	1899-12-31 17:30:00	2021-04-08	1899-12-31 21:18:00	2021-04-14	6	1	Qingming	Cerebral Infarction	1	0	2021-12-13	1	1	0	0	0	1	0	0	1	0	0	1	0	0	177	107	71	17	100	36.8	2	1	1	3	0	0	5.1	1	0	0	0	1	0
109	Male	67	1	1	2021-04-08	1899-12-31 17:30:00	2021-04-08	1899-12-31 18:00:00	2021-04-19	11	1	Qingming	Large Artery Atherosclerosis Type	1	0	2021-05-12	1	0	0	0	0	0	0	0	0	0	0	0	0	0	187	97	98	19	97	36.7	0	4	1	1	0	0	8	1	0	0	0	0	0
110	Male	56	2	1	2021-04-07	1899-12-31 15:01:00	2021-04-08	1899-12-31 10:11:00	2021-04-11	3	1	Qingming	Cerebral Infarction	1	0	2022-10-09	1	1	0	0	0	0	0	0	0	0	0	0	0	0	224	116	120	16	96	36.2					0	0	11.2
111	Female	66	1	1	2021-04-06	1899-12-31 16:00:00	2021-04-06	1899-12-31 18:13:00	2021-04-13	7	1	Qingming	Lacunar Infarction due to Atherosclerosis	1	0	2023-02-13	1	1	0	0	0	0	0	0	0	0	0	0	0	0	198	98	86	20	99	36.6	2	1	1	2	0	0	8.5	1	0	0	0	0	0
112	Female	66	2	1	2021-04-05	1899-12-31 15:00:00	2021-04-05	1899-12-31 16:00:00	2021-04-18	13	1	Qingming	Cerebral Infarction	1	0	2021-04-18	1	1	0	1	0	0	0	0	0	0	0	0	0	0	203	95	95	14	97	36.4	21	5	5	2	0	0	8.3	1	0	0	0	0	1
113	Male	81	1	1	2021-04-05	1899-12-31 06:15:00	2021-04-05	1899-12-31 11:45:00	2021-04-12	7	1	Qingming	Cerebral Infarction	1	0	2021-12-10	1	1	1	1	1	0	0	0	0	0	0	0	0	0	152	96	98	21	98	36.5	10	4	5	5	0	0	13.6	1	0	0	0	0	0
114	Male	77	1	2	2021-04-04	1899-12-31 19:00:00	2021-04-04	1899-12-31 22:43:00	2021-04-10	6	1	Qingming	Large Artery Atherosclerosis Type	1	0	2023-03-16	1	0	0	0	0	1	0	0	0	0	0	0	0	0	154	69	57	19	98	36.5	3	3	3	3	0	0	6.7	1	0	0	0	1	0
115	Male	90	2	1	2021-04-02	1899-12-31 22:00:00	2021-04-03	1899-12-31 14:09:00	2021-04-13	10	1	Vernal Equinox	Large Artery Atherosclerosis Type	1	0	2021-05-17	2	1	0	0	0	1	0	0	0	0	0	1	0	0	136	88	91	17	95	36.7	12	5	4	4	0	0	6.9	1	0	1	0	0	0
116	Female	54	2	1	2020-04-01	1899-12-31 21:00:00	2021-04-02	1899-12-31 13:49:00	2021-04-04	2	2	Vernal Equinox	Cerebral Infarction	1	0	2021-04-04	1	1	0	0	0	0	0	0	0	0	0	0	0	0	166	102		18	97	36.3	4	2	1	1	0	0	7.1	0	0	0	0	0	0
117	Male	52	1	1	2021-03-31	1899-12-31 22:30:00	2021-04-01	1899-12-31 01:04:00	2021-04-07	6	1	Vernal Equinox	Large Artery Atherosclerosis Type	1	0	2021-04-21	1	1	0	0	0	1	0	0	0	0	0	0	1	0	124	101	73	17	97	36.5	1	1	1	3	0	0	8.3	0	1	0	0	1	0
118	Female	91	1	1	2021-03-31	1899-12-31 15:00:00	2021-04-01	1899-12-31 09:42:00	2021-06-30	90	1	Vernal Equinox	Large Artery Atherosclerosis Type	1	0	2021-10-26	2	1	1	0	0	0	0	0	1	0	1	0	0	0	224	103	68	17	99	36.4	4	4	4		0	0	13	1	1	1	0	0	0
119	Female	78	1	1	2021-03-30	1899-12-31 15:05:00	2021-03-30	1899-12-31 15:10:00	2021-04-09	10	1	Vernal Equinox	Large Artery Atherosclerosis Type	1	0	2022-10-19	1	1	0	1	1	0	0	0	0	0	0	0	0	0	198	71	76	20	100	36.7	7	4	1	4	0	0	7.8	1	0	0	0	0	1
120	Male	68	2	1	2021-03-29	1899-12-31 09:30:00	2021-03-29	1899-12-31 22:20:00	2021-04-07	9	1	Vernal Equinox	Cardioembolic Type	1	0	2021-04-19	1	0	0	0	1	0	0	0	0	0	0	1	0	0	127	89	127	25	83	36.8	7	4	4	3	0	4	6.3	1	0	0	0	0	0
121	Male	62	2	1	2021-03-28	1899-12-31 12:00:00	2021-03-28	1899-12-31 15:28:00	2021-04-01	4	1	Vernal Equinox	Large Artery Atherosclerosis Type	1	0	2021-04-01	1	1	1	0	0	0	0	0	0	0	0	1	1	0	147	86	73	20	98	36.2	4	2	1	2	0	0	11.4	1	0	0	0	1	0
122	Male	60	2	1	2021-03-27	1899-12-31 15:00:00	2021-03-27	1899-12-31 16:40:00	2021-04-07	11	1	Vernal Equinox	Cerebral Infarction	3	0	2021-04-15	1	1	0	0	0	1	0	0	0	0	0	0	0	0	176	105	72	14	99	36.5	0	2	1	2	3	0	6.6	1	0	0	0	1	0
123	Male	57	2	1	2021-03-26	1899-12-31 23:00:00	2021-03-27	1899-12-31 08:25:00	2021-04-09	13	1	Vernal Equinox	Small Artery Occlusion Type	1	0	2021-04-09	1	0	0	0	0	0	0	0	0	0	0	0	0	0	158	103	67	20	99	36	4	3	1	1	0	0	5.8	0	0	0	0	1	0
124	Male	57	1	2	2021-03-26	1899-12-31 02:00:00	2021-03-26	1899-12-31 15:08:00	2021-04-03	8	1	Vernal Equinox	Large Artery Atherosclerosis Type	1	0	2021-04-09	1	1	0	0	0	1	0	0	0	0	0	0	0	0	139	87	113	24	98	36.7	3	1	1	4	0	0	6.7	1	0	1	0	1	0
125	Male	57	1	1	2021-03-25	1899-12-31 09:00:00	2021-03-25	1899-12-31 12:32:00	2021-04-01	7	1	Vernal Equinox	Large Artery Atherosclerosis Type	1	0	2021-10-07	1	0	0	0	0	0	0	0	0	0	0	0	0	0	149	77	75	20	98	36.7	4	2	1	2	0	0	19.5	1	0	0	0	0	0
126	Male	72	1	1	2021-03-24	1899-12-31 23:00:00	2021-03-25	1899-12-31 12:04:00	2021-03-30	5	1	Vernal Equinox	Large Artery Atherosclerosis Type	1	0	2022-10-06	1	1	0	0	0	0	0	0	0	0	0	0	0	0	125	80	97	25	97	36.5	1	1	1	2	0	0	9.3	0	0	1	0	1	0
127	Male	80	2	2	2021-03-24	1899-12-31 08:00:00	2021-03-24	1899-12-31 13:07:00	2021-03-25	1	1	Vernal Equinox	Cerebral Infarction	1	0	2021-03-25	1	1	0	0	0	0	1	0	0	0	0	0	0	0	132	75	111	20	95	36.2	32	5	5		0	0	7.7	0	0	0	0	0	1
128	Male	87	1	1	2021-03-24	1899-12-31 07:20:00	2021-03-24	1899-12-31 10:27:00	2021-03-31	7	1	Vernal Equinox	Large Artery Atherosclerosis Type	1	0	2022-02-17	1	1	0	0	0	1	0	0	0	0	0	0	0	0	157	87	84	20	100	36	3	2	1	4	0	0	7.7	1	0	1	0	0	0
129	Male	82	1	1	2021-03-22	1899-12-31 16:00:00	2021-03-23	1899-12-31 17:13:00	2021-03-31	8	1	Vernal Equinox	Large Artery Atherosclerosis Type	1	0	2022-10-25	1	0	0	0	0	0	0	0	0	0	0	0	1	0	148	90	90	24	98	36.8	5	3	2	4	0	0	10.7	1	0	1	0	1	0
130	Male	54	2	1	2021-03-19	1899-12-31 16:00:00	2021-03-19	1899-12-31 21:09:00	2021-03-20	1	1	Awakening of Insects	Cardioembolic Type	1	0	2021-03-20	1	0	0	0	1	0	0	0	1	0	0	0	0	0	142	80	98	16	100	36	11	5	2		0	0	8.6	0	0	0	0	0	0
131	Male	63	1	2	2021-03-06	1899-12-31 22:00:00	2021-03-07	1899-12-31 09:25:00	2021-03-10	3	1	Awakening of Insects	Large Artery Atherosclerosis Type	1	0	2021-03-11	1	0	0	0	0	1	0	0	0	0	0	0	0	0	168	101	78	18	99	36.2	6	4	1	3	0	0	6.9	1	1	0	0	0	0
132	Male	64	1	1	2021-03-07	1899-12-31 10:25:00	2021-03-07	1899-12-31 10:59:00	2021-03-14	7	1	Awakening of Insects	Large Artery Atherosclerosis Type	1	0	2021-03-14	1	1	0	0	0	0	0	0	0	0	0	0	0	0	96	106	89	22	99	36	15	4	3	2	0	0	9	1	0	0	0	0	0
133	Female	74	2	2	2021-03-07	1899-12-31 12:00:00	2021-03-07	1899-12-31 20:24:00	2021-03-18	11	1	Awakening of Insects	Large Artery Atherosclerosis Type	1	0	2023-01-11	1	1	0	0	0	1	0	0	0	0	0	0	0	0	166	85	75	19	100	36.7	17	5	3	4	0	0	6.5	1	1	0	0	0	0
134	Male	61	1	1	2021-03-09	1899-12-31 16:30:00	2021-03-09	1899-12-31 22:00:00	2021-03-16	7	1	Awakening of Insects	Cardioembolic Type	1	0	2021-03-16	1	1	0	1	1	0	0	0	0	0	0	0	1	1	150	105	140	20	98	36.7	17	5	4	3	0	0	6.7	0	1	0	0	0	0
135	Male	66	1	2	2021-03-09	1899-12-31 20:00:00	2021-03-10	1899-12-31 10:49:00	2021-03-17	7	1	Awakening of Insects	Large Artery Atherosclerosis Type	1	0	2022-12-21	1	1	0	0	0	1	0	0	0	0	0	0	0	0	164	96	74	18	95	36.6	8	3	2	3	0	0	6.6	1	0	0	0	1	0
136	Male	65	2	1	2021-03-10	1899-12-31 05:00:00	2021-03-10	1899-12-31 08:28:00	2021-03-24	14	1	Awakening of Insects	Large Artery Atherosclerosis Type	1	0	2021-10-23	1	1	1	0	0	1	0	0	0	0	0	0	0	0	146	95	75	20	98	36.2	7	4	1	4	0	0	10	1	0	1	0	0	0
137	Female	59	1	1	2021-03-10	1899-12-31 23:10:00	2021-03-10	1899-12-31 23:47:00	2021-03-17	7	1	Awakening of Insects	Large Artery Atherosclerosis Type	1	0	2023-02-28	1	1	0	0	0	0	0	0	0	0	0	0	0	0	201	96	104	20	100	36.5	11	4	1	1	0	0	16.6	1	0	1	0	1	0
138	Female	71	2	1	2021-03-11	1899-12-31 03:00:00	2021-03-11	1899-12-31 11:10:00	2021-03-28	17	1	Awakening of Insects	Large Artery Atherosclerosis Type	1	0	2021-04-12	1	1	1	0	0	0	0	0	0	0	0	0	0	0	159	87	88	18	100	36.3	11	4	1	3	0	0	6.6	1	0	1	0	0	0
139	Male	61	1	1	2021-03-12	1899-12-31 18:00:00	2021-03-13	1899-12-31 01:36:00	2021-03-20	7	2	Awakening of Insects	Large Artery Atherosclerosis Type	1	0	2021-03-20	2	1	0	0	0	0	0	0	0	0	0	0	0	0	142	90	126	22	98	37	28	5	5	1	0	0	9.2	0	0	0	0	0	0
140	Female	62	2	1	2021-03-14	1899-12-31 09:00:00	2021-03-14	1899-12-31 12:10:00	2021-05-22	69	1	Awakening of Insects	Intracerebral Hemorrhage	2	0	2021-09-02	1	0	0	0	0	0	0	0	0	0	0	0	0	0	158	98	99	20	100	36.7		5	5		0	0	10.6	0	0	0	0	0	0
141	Male	84	1	1	2021-03-14	1899-12-31 16:00:00	2021-03-14	1899-12-31 23:05:00	2021-04-06	23	1	Awakening of Insects	Intracerebral Hemorrhage	2	0	2022-09-17	1	0	1	0	0	0	0	1	1	0	1	0	0	0	168	92	73	16	98	37.1	8	4	1	3	0	0	8.1	0	0	0	0	0	0
142	Male	72	1	2	2021-03-14	1899-12-31 19:00:00	2021-03-14	1899-12-31 19:56:00	2021-03-19	5	1	Awakening of Insects	TIIA	3	0	2023-03-08	1	1	1	0	0	1	0	0	0	0	0	0	1	0	144	86	94	19	100	36.9				4	6	0	8.4	0	0	1	0	1	0
143	Male	42	2	1	2021-03-15	1899-12-31 14:00:00	2021-03-15	1899-12-31 15:35:00	2021-03-18	3	1	Awakening of Insects	Large Artery Atherosclerosis Type	1	0	2022-05-31	1	0	0	0	0	0	0	0	0	0	0	0	1	0	191	112	80	20	98	36	3	1	1	1	0	0	5.9	0	0	0	0	0	0
144	Male	65	2	1	2021-03-16	1899-12-31 04:00:00	2021-03-16	1899-12-31 07:29:00	2021-04-20	35	1	Awakening of Insects	Cardioembolic Type	1	0	2022-07-20	1	0	0	1	1	1	0	0	0	0	0	0	0	0	136	105	116	25	96	36.4	13	4	4	3	0	3	11.1	0	0	0	0	0	0
145	Female	66	2	1	2021-03-16	1899-12-31 17:08:00	2021-03-16	1899-12-31 19:28:00	2021-03-24	8	1	Awakening of Insects	Cerebral Infarction	1	0	2023-02-12	1	0	0	0	0	0	0	0	0	0	0	1	0	0	160	52	42	16	98	36.6	3	2	1	2	0	0	8.2	1	0	0	0	0	0
146	Male	65	1	1	2021-03-17	1899-12-31 10:25:00	2021-03-17	1899-12-31 16:05:00	2021-03-28	11	1	Awakening of Insects	Cerebral Infarction	1	0	2021-04-14	1	1	0	0	0	1	0	0	0	0	0	0	0	0	220	100	92	20	96	36.3	10	4	4	5	0	0	7.7	1	0	0	0	0	1
147	Male	51	1	1	2021-03-18	1899-12-31 06:00:00	2021-03-18	1899-12-31 12:04:00	2021-03-24	6	1	Awakening of Insects	Large Artery Atherosclerosis Type	1	0	2022-10-18	1	1	1	0	0	1	0	0	0	0	0	0	0	0	167	116	100	19	36.4	36.4	3	1	1	3	0	0	22	1	0	0	0	1	0
148	Male	55	1	1	2021-03-19	1899-12-31 06:00:00	2021-03-20	1899-12-31 07:25:00	2021-03-30	10	1	Awakening of Insects	Large Artery Atherosclerosis Type	1	0	2021-10-26	1	1	0	0	0	0	0	0	0	0	0	1	0	0	145	99	85	21	91	36	32	5	5		0	0	7.7	1	0	0	0	0	0
149	Male	71	2	1	2021-03-20	1899-12-31 10:00:00	2021-02-21	1899-12-31 23:41:00	2021-03-04	11	1	Rain Wate	Large Artery Atherosclerosis Type	1	0	2021-04-07	1	0	0	0	0	0	0	0	0	0	0	1	0	0	146	106	72	16	99	36.4	13	4	4	3	0	0	5.2	1	1	0	0	0	0
150	Male	44	2	1	2021-02-21	1899-12-31 23:30:00	2021-02-21	1899-12-31 23:20:00	2021-03-07	14	2	Rain Wate	Large Artery Atherosclerosis Type	1	0	2021-03-07	2	1	0	0	0	0	0	0	0	0	0	0	1	1	172	88	100	22	99	36.7	29	5	5		0	0	11.9	0	0	0	0	0	0
151	Female	70	1	1	2021-02-22	1899-12-31 16:46:00	2021-02-22	1899-12-31 17:16:00	2021-03-05	11	1	Rain Wate	Cerebral Infarction	1	0	2021-03-04	1	1	1	1	0	1	0	0	0	0	0	0	0	0	182	82	115	14	100	36.5	13	4	4	5	0	0	9.8	1	1	0	0	0	0
152	Male	60	1	1	2021-02-24	1899-12-31	2021-02-24	1899-12-31 01:00:00	2021-03-04	8	1	Rain Wate	TIA	3	0	2023-01-19	1	1	0	0	0	1	0	0	0	0	0	0	0	0	201	97	83	19	99	36	6	3	1	2	0	0	5.4	1	0	1	0	1	0
153	Male	62	2	1	2021-02-24	1899-12-31 18:20:00	2021-02-24	1899-12-31 18:50:00	2021-03-05	9	1	Rain Wate	Large Artery Atherosclerosis Type	1	0	2021-09-10	1	1	0	1	0	0	0	0	0	0	0	0	0	0	136	98	131	20	100	36.7	13	5	3	2	0	0	7.1	1	0	1	0	0	0
154	Male	68	2	2	2021-02-25	1899-12-31 09:30:00	2021-02-25	1899-12-31 11:49:00	2021-03-08	11	1	Rain Wate	Large Artery Atherosclerosis Type	1	0	2021-03-08	1	1	1	0	0	1	0	0	0	0	0	1	0	0	135	76	77	20	100	36.7	24	5	5	5	0	0	26	1	0	1	0	1	0
155	Male	68	1	1	2021-02-27	1899-12-31 10:50:00	2021-02-27	1899-12-31 11:45:00	2021-03-06	7	1	Rain Wate	Cerebral Infarction	1	0	2021-03-06	1	1	1	1	0	1	0	0	0	0	0	1	0	0	154	90	87	20	99	36.2	14	4	3		0	0	14.3	1	0	0	0	0	0
156	Female	73	1	1	2021-03-02	1899-12-31 16:32:00	2021-03-02	1899-12-31 19:32:00	2021-03-12	10	1	Rain Wate	Cardioembolic Type	1	0	2023-03-15	1	1	0	1	0	0	0	0	0	0	0	0	0	0	131	71	66	17	99	36.7	6	4	1	2	0	0	7.2	0	0	0	0	0	0
157	Male	68	2	1	2021-03-03	1899-12-31 17:30:00	2021-03-03	1899-12-31 19:36:00	2021-03-13	10	1	Rain Wate	Large Artery Atherosclerosis Type	1	0	2021-03-13	1	1	0	0	0	1	0	0	0	0	0	1	0	0	204	102	76	20	100	36.6	3	4	1	4	0	0	5.3	1	0	0	0	1	0
158	Male	48	1	1	2021-03-03	1899-12-31 07:03:00	2021-03-03	1899-12-31 07:05:00	2021-03-11	8	1	Rain Wate	Large Artery Atherosclerosis Type	1	0	2021-03-11	1	0	0	0	0	0	0	0	0	0	0	0	0	0	206	102	79	20	98	36.8	11	0	1		0	0	6.8	1	0	1	0	1	0
159	Male	65	1	1	2021-03-04	1900-01-01	2021-03-04	1899-12-31 00:48:00	2021-03-09	5	1	Rain Wate	Large Artery Atherosclerosis Type	1	0	2022-10-19	1	0	0	0	0	0	0	0	0	0	0	0	1	0	100	75	80	20	100	36.8	6	4	1	2	0	0	9.5	0	0	0	0	0	0
160	Female	70	1	1	2021-03-05	1899-12-31 03:52:00	2021-03-05	1899-12-31 04:22:00	2021-03-12	7	1	Awakening of Insects	TIA	3	0	2023-01-18	1	1	1	1	0	0	0	0	0	0	0	0	0	0	139	84	102	20	99	36.4	1			5	2	0	12.3	1	0	0	0	1	0
161	Male	63	2	1	2021-03-05	1899-12-31 18:38:00	2021-03-05	1899-12-31 18:58:00	2021-03-11	6	2	Awakening of Insects	Intracerebral Hemorrhage	2	50	2021-03-10	2	1	0	0	0	0	0	0	0	0	0	0	0	0	226	178	130	20	40	36.3	26				0	0	7.6	0	0	0	0	0	0
162	Male	40	2	1	2021-03-05	1899-12-31 17:40:00	2021-03-05	1899-12-31 22:35:00	2021-03-22	17	1	Awakening of Insects	Cerebral Infarction	1	0	2021-03-22	1	0	0	1	0	0	0	0	0	0	0	0	0	0	113	76	56	18	95	36.9	15	4	3		0	0	6.9	0	1	0	0	0	0
163	Male	78	1	2	2021-03-05	1899-12-31 21:45:00	2021-03-05	1899-12-31 22:32:00	2021-03-23	18	1	Awakening of Insects	Cardioembolic Type	1	0	2023-02-14	2	1	0	0	1	1	1	0	0	0	0	1	0	0	134	75	97	20	98	36.7	21	5	5	4	0	7	7.9	1	0	0	0	1	0
164	Female	70	2	1	2021-03-05	1899-12-31 20:00:00	2021-03-06	1899-12-31 08:38:00	2021-03-14	8	1	Awakening of Insects	Cerebral Infarction	1	0	2023-03-09	1	1	0	1	0	0	0	0	0	0	0	1	0	0	158	88	82	17	99	36.7	3	1	2	5	0	0	7	1	0	0	0	0	0
165	Male	82	1	1	2021-03-06	1899-12-31 12:50:00	2021-03-06	1899-12-31 18:45:00	2021-03-12	6	1	Awakening of Insects	Cardioembolic Type	1	0	2023-02-12	1	1	0	0	0	1	0	0	0	0	0	0	0	0	151	107	148	15	98	36.5	4	4	1	4	0	4	5.8	1	0	1	0	0	0
166	Male	62	1	1	2021-02-20	1899-12-31 15:10:00	2021-02-20	1899-12-31 20:50:00	2021-03-01	9	1	Rain Wate	Large Artery Atherosclerosis Type	1	0	2021-03-01	1	1	0	1	0	0	0	0	0	0	0	1	0	0	138	89	103	20	99	36.3	19	5	4	2	0	0	11.7	1	0	1	0	0	1
167	Female	56	2	1	2021-02-18	1899-12-31 08:00:00	2021-02-18	1899-12-31 18:37:00	2021-03-01	11	1	Rain Wate	Large Artery Atherosclerosis Type	1	0	2022-04-03	1	0	0	0	0	0	0	0	0	0	0	1	0	0	156	78	65	18	100	36.4	9	4	3	0	0	0	6.5	0	0	0	1	0	1
168	Male	45	2	1	2021-02-17	1899-12-31 14:30:00	2021-02-17	1899-12-31 14:58:00	2021-03-29	40	1	Start of Spring	Intracerebral Hemorrhage	2	0	2021-04-13	1	0	0	0	0	0	0	0	0	0	0	0	0	0	215	152	98	17	98	36.6	15	5	5	0	0	0	7.5	0	0	0	0	0	0
169	Male	67	1	1	2021-02-16	1899-12-31 22:00:00	2021-02-17	1899-12-31 13:43:00	2021-02-24	7	1	Start of Spring	Cerebral Infarction	1	0	2022-12-26	1	1	1	0	0	0	0	0	0	0	0	1	0	0	160	97	75	20	98	36.3	2	1	1	4	0	0	11.7	1	0	0	0	1	0
170	Female	53	1	1	2021-02-16	1899-12-31 23:00:00	2021-02-17	1899-12-31 08:45:00	2021-02-25	8	1	Start of Spring	Cerebral Infarction	1	0	2021-02-28	1	1	0	0	0	1	0	0	0	0	0	0	0	0	219	120	98	21	99	36.6	8	4	2	2	0	0	7.7	1	0	1	0	0	0
171	Male	30	2	1	2021-02-16	1899-12-31 14:00:00	2021-02-16	1899-12-31 17:18:00	2021-02-24	8	1	Start of Spring	Cardioembolic Type	1	0	2021-02-24	1	0	0	0	0	0	0	0	0	0	0	1	0	0	143	83	82	19	98	36.2	10	4	1	1	0	0	4.4	0	0	0	0	0	0
172	Male	62	2	1	2021-02-14	1899-12-31 19:54:00	2021-02-14	1899-12-31 19:55:00	2021-02-20	6	1	Start of Spring	Cerebral Infarction	1	0	2022-03-09	1	1	1	0	0	0	0	0	0	0	0	0	0	0	155	95	70	18		36.6	17	5	4	5	0	0		1	0	1	0	1	0
173	Male	77	2	1	2021-02-13	1899-12-31 01:00:00	2021-02-13	1899-12-31 10:15:00	2021-02-24	11	1	Start of Spring	Cerebral Infarction	1	0	2022-06-13	1	0	0	0	0	0	0	0	0	0	0	1	0	0	175	85	87	20	98	36	2	2	1	2	0	0	7.4	1	0	1	0	1	0
174	Male	67	1	1	2021-02-12	1899-12-31 23:00:00	2021-02-13	1899-12-31 01:30:00	2021-02-24	11	1	Start of Spring	Large Artery Atherosclerosis Type	1	0	2021-06-07	2	1	0	0	0	1	0	0	0	0	1	0	0	0	105	92	100	24	98	38	8	4	2	3	0	0	6.4	1	0	0	0	0	0
175	Female	68	2	1	2021-02-12	1899-12-31 10:30:00	2021-02-12	1899-12-31 16:05:00	2021-04-23	70	1	Start of Spring	Cerebral Infarction	1	0	2021-04-23	1	0	0	0	0	0	0	0	0	0	0	1	0	0	126	80	72	18	92	36.7	13	5	2		0	0	6.6	1	0	0	0	0	1
176	Female	73	1	1	2021-02-11	1899-12-31 18:00:00	2021-02-12	1899-12-31 10:02:00	2021-02-21	9	1	Start of Spring	Large Artery Atherosclerosis Type	1	0	2022-08-23	1	0	0	0	0	0	0	0	0	0	0	0	0	0	169	129	115	17	100	36	3	4	2	2	0	0	7.4	1	0	0	0	1	0
177	Female	71	1	1	2021-02-12	1899-12-31 10:30:00	2021-02-12	1899-12-31 12:10:00	2021-02-21	9	1	Start of Spring	Large Artery Atherosclerosis Type	1	0	2021-06-07	1	0	0	0	0	0	0	0	0	0	0	1	0	0	189	103	85	17	100	36.6	8	4	1	1	0	0	10.7	1	0	0	0	0	0
178	Male	74	1	1	2021-02-11	1899-12-31 17:00:00	2021-02-11	1899-12-31 19:35:00	2021-02-19	8	1	Start of Spring	Large Artery Atherosclerosis Type	3	0	2021-12-10	1	1	0	0	1	1	0	0	0	0	0	0	0	0	165	90	75	20	99	36.7	0	1	1	4	0	0	7.7	1	0	0	0	1	0
179	Male	70	2	1	2021-02-11	1899-12-31 09:20:00	2021-02-11	1899-12-31 10:21:00	2021-02-16	5	1	Start of Spring	Large Artery Atherosclerosis Type	1	0	2021-02-16	1	0	0	0	0	0	0	0	0	0	0	1	1	0	120	72	71	19	98	36.2	4	4	1	3	0	0	8.8	0	0	0	0	0	0
180	Female	68	1	1	2021-02-07	1899-12-31 17:00:00	2021-02-08	1899-12-31 15:40:00	2021-02-14	6	1	Start of Spring	Cerebral Infarction	1	0	2021-02-14	1	0	0	0	0	0	0	0	0	0	0	1	0	0	115	78	75	20	98	36.5	7	3	1		0	0	8.6	0	0	0	0	0	0
181	Female	62	1	1	2021-02-07	1899-12-31 08:30:00	2021-02-07	1899-12-31 12:31:00	2021-02-18	11	1	Start of Spring	Large Artery Atherosclerosis Type	1	0	2021-02-18	1	0	1	0	0	0	1	0	0	0	0	0	0	0	196	91	112	25	99	39	8	4	1	2	0	0	13	1	0	0	0	0	0
182	Male	69	1	1	2021-02-06	1899-12-31 09:00:00	2021-02-06	1899-12-31 14:15:00	2021-02-25	19	1	Major Cold	Large Artery Atherosclerosis Type	1	0	2021-02-17	1	0	0	1	0	0	0	0	0	0	0	0	0	0	138	76	86	20	99	36.2	4	3	1	2	0	0	6.5	1	0	0	0	1	1
183	Male	63	2	1	2021-02-05	1899-12-31 21:00:00	2021-02-06	1899-12-31 08:26:00	2021-02-09	3	1	Start of Spring	Large Artery Atherosclerosis Type	1	0	2021-08-23	1	0	0	1	0	0	0	0	0	0	0	1	1	1	136	81	61	20	98	36.2	14	4	1		0	0	7	1	0	0	0	1	1
184	Male	67	1	1	2021-02-05	1899-12-31 11:00:00	2021-02-05	1899-12-31 12:30:00	2021-02-12	7	1	Start of Spring	Large Artery Atherosclerosis Type	1	0	2022-05-13	1	1	0	0	0	0	0	0	0	0	0	1	0	0	177	79	73	20	97	36.5	6	4	1	3	0	0	6.2	0	0	0	1	1	0
185	Female	67	2	1	2021-02-04	1899-12-31 05:00:00	2021-02-04	1899-12-31 06:12:00	2021-02-11	7	1	Start of Spring	Cardioembolic Type	1	0	2023-03-13	1	0	0	1	0	0	0	0	0	0	0	1	0	0	139	89	89	20	98	36.4	10	4	2	4	0	4	7.3	1	0	1	0	1	0
186	Female	71	2	1	2021-02-02	1899-12-31 19:00:00	2021-02-02	1899-12-31 21:40:00	2021-02-05	3	1	Major Cold	Cerebral Infarction	1	0	2021-02-05	1	1	0	0	0	1	0	0	0	0	0	0	0	0	145	98	82	16	98	36	0	1	1		0	0	5.8	1	0	0	0	1	0
187	Female	61	1	1	2021-02-02	1899-12-31 16:50:00	2021-02-02	1899-12-31 17:30:00	2021-02-11	9	1	Major Cold	TIA	3	0	2021-03-16	1	1	0	1	0	1	0	0	0	0	0	0	0	0	143	90	75	20	99	36.2				3	5	0	5.8	1	0	0	0	0	0
188	Female	61	2	1	2021-02-01	1899-12-31 04:00:00	2021-02-01	1899-12-31 06:50:00	2021-02-09	8	1	Major Cold	Large Artery Atherosclerosis Type	1	0	2023-03-23	1	1	0	0	0	0	1	0	0	0	0	0	0	0	151	114	94	20	97	36	5	3	2	1	0	0	7.4	1	0	1	0	1	0
189	Male	57	1	1	2021-02-01	1899-12-31 18:30:00	2021-02-01	1899-12-31 19:16:00	2021-02-10	9	1	Major Cold	Large Artery Atherosclerosis Type	1	0	2021-02-10	1	0	1	0	0	1	0	0	0	0	0	0	0	0	149	78	80	17	100	36.8	14	4	3	2	0	0	11.8	0	0	1	0	0	0
190	Female	57	2	1	2021-01-30	1899-12-31 07:09:00	2021-01-30	1899-12-31 20:45:00	2021-02-06	7	1	Major Cold	Large Artery Atherosclerosis Type	1	0	2022-10-03	1	1	0	0	0	0	0	0	0	0	0	0	0	0	149	76	109	21	98	36.5	4	3	1	1	0	0	7.8	1	0	1	0	0	0
191	Male	58	1	1	2021-01-26	1899-12-31 17:28:00	2021-01-26	1899-12-31 17:48:00	2021-02-09	14	1	Slight cold	Intracerebral Hemorrhage	2	14	2022-04-25	1	1	0	0	0	0	0	0	0	0	0	0	0	0	191	112	86	20	99	36	13	5	5	2	0	0	5.4	0	0	0	0	0	0
192	Male	65	1	1	2021-01-26	1899-12-31 18:06:00	2021-01-26	1899-12-31 19:06:00	2021-02-03	8	1	Major Cold	Large Artery Atherosclerosis Type	1	0	2022-11-04	1	1	1	0	0	0	0	0	0	0	0	0	0	0	163	81	83	20	100	36.2	5	3	1		0	0	5.3	1	0	0	1	0	0
193	Female	55	2	1	2021-01-25	1899-12-31 05:20:00	2021-01-25	1899-12-31 06:09:00	2021-02-03	9	1	Major Cold	Large Artery Atherosclerosis Type	1	0	2022-07-18	1	0	1	0	0	0	0	0	0	0	0	0	0	0	166	88	108	20	97	36.4	9	4	2	1	0	0	7.1	1	0	1	0	0	0
194	Male	48	1	2	2021-01-22	1899-12-31 17:00:00	2021-01-23	1899-12-31 15:10:00	2021-02-03	11	1	Major Cold	Large Artery Atherosclerosis Type	1	0	2021-02-03	1	1	0	0	0	1	0	0	0	0	0	0	0	0	200	97	107	22	100	36.4	14	5	3	3	0	0	9.8	1	1	1	0	1	0
195	Male	71	1	1	2021-01-23	1899-12-31 11:00:00	2021-01-23	1899-12-31 13:55:00	2021-02-02	10	1	Major Cold	Cerebral Infarction	1	0	2022-10-29	1	1	0	1	0	1	0	0	0	0	0	0	0	0	147	92	77	20	98	36.5	1	1	1	3	0	0	8.6	1	0	0	0	0	0
196	Female	77	1	1	2021-01-22	1899-12-31 20:00:00	2021-01-23	1899-12-31 13:20:00	2021-01-27	4	1	Major Cold	Large Artery Atherosclerosis Type	1	0	2021-01-27	1	0	1	1	0	0	0	0	0	0	0	0	0	0	172	100	98	21	98	36.4	17	5	5		0	0	9.7	0	1	0	0	0	0
197	Female	50	1	1	2021-01-22	1899-12-31 19:00:00	2021-01-22	1899-12-31 22:20:00	2021-01-28	6	1	Major Cold	Large Artery Atherosclerosis Type	1	0	2022-04-20	1	0	0	1	0	0	0	0	0	0	0	1	0	0	189	91	73	20	98	36.7	1	1	1	1	0	0	5.4	0	0	0	1	0	0
198	Male	67	2	1	2021-01-21	1899-12-31 22:00:00	2021-01-22	1899-12-31 10:58:00	2021-04-02	70	1	Major Cold	Cerebral Infarction	1	0	2021-04-27	1	0	0	0	0	0	0	1	0	0	0	0	0	0	162	91	85	20	99	36.4	0	2	1	0	0	0	7.5	0	0	0	0	1	1
199	Male	46	2	1	2021-01-22	1899-12-31	2021-01-22	1899-12-31 08:25:00	2021-01-30	8	1	Major Cold	Large Artery Atherosclerosis Type	1	0	2021-08-17	1	1	0	0	0	0	0	0	1	0	0	1	1	1	174	109	75	18	98	36.5	6	2	2	1	0	0	9.1	1	0	1	0	1	0
200	Male	86	2	1	2021-01-21	1899-12-31 08:30:00	2021-01-21	1899-12-31 10:09:00	2021-01-27	6	1	Major Cold	Cerebral Infarction	1	0	2021-02-18	1	0	0	0	0	0	0	0	0	0	0	1	0	0	130	71	76	18	98	36.8	9	4	1	2	0	0	6.7	1	0	0	0	1	0
201	Male	52	1	1	2021-01-21	1899-12-31 01:10:00	2021-01-21	1899-12-31 01:52:00	2021-01-29	8	1	Major Cold	Large Artery Atherosclerosis Type	1	0	2021-01-29	1	1	0	0	0	1	0	0	0	0	0	0	0	0	191	104	87	27	99	36.8	10	4	3	4	0	0	8.4	1	0	0	0	1	0
202	Male	60	2	1	2021-01-18	1899-12-31 08:00:00	2021-01-18	1899-12-31 10:55:00	2021-01-28	10	1	Slight cold	Large Artery Atherosclerosis Type	1	0	2021-01-28	1	0	0	0	0	0	0	1	0	0	0	0	0	0	153	106	72	20	99	36.3	14	4	3		0	0	5.7	1	0	1	0	0	0
203	Female	49	2	2	2021-01-03	1899-12-31 13:00:00	2021-01-03	1899-12-31 18:22:00	2021-01-11	8	1	Winter Solstice Festival	Cerebral Infarction	1	0	2023-03-06	1	0	0	0	1	1	1	0	0	0	0	0	0	0	123	82	118	24	100	36.6	7	3	1	2	0	0	8.3	1	0	0	0	0	0
204	Male	66	1	1	2021-01-04	1899-12-31 01:30:00	2021-01-04	1899-12-31 04:20:00	2021-01-13	9	1	Winter Solstice Festival	Large Artery Atherosclerosis Type	1	0	2021-01-13	1	0	0	0	0	0	0	0	0	0	0	0	1	0	189	97	90	24	98	36.8	12	4	3		0	0	6.6	1	0	0	0	0	0
205	Male	72	1	1	2021-01-04	1899-12-31 18:30:00	2021-01-04	1899-12-31 20:00:00	2021-01-11	7	1	Winter Solstice Festival	Cerebral Infarction	1	0	2021-06-14	1	1	1	0	0	0	0	0	0	0	1	1	0	0	139	79	73	20	98	36.5	3	2	1	3	0	0	5.4	1	0	1	0	1	0
206	Male	64	1	1	2021-01-07	1899-12-31 03:30:00	2021-01-07	1899-12-31 15:20:00	2021-01-22	15	1	Slight cold	Cerebral Infarction	1	0	2023-04-07	1	1	0	0	0	0	0	0	0	0	0	0	0	0	193	102	78	20	96	36.9	12	4	1	1	0	0	7.1	1	0	0	0	1	0
207	Female	84	2	1	2021-01-06	1899-12-31 16:00:00	2021-01-07	1899-12-31 16:05:00	2021-01-12	5	1	Slight cold	Large Artery Atherosclerosis Type	1	0	2023-04-03	1	1	1	0	0	1	0	0	0	0	0	0	0	0	138	74	60	19	98	36.5	0	1	1	5	0	0	9.9	1	0	0	0	1	0
208	Male	79	1	1	2021-01-08	1899-12-31 00:10:00	2021-01-08	1899-12-31 01:14:00	2021-02-10	33	1	Slight cold	Intracerebral Hemorrhage	2	0	2021-02-10	1	1	0	0	0	0	0	0	0	0	0	1	0	0	142	65	93	16	98	36.3	14	5	4		0	0	9.2	0	0	0	0	0	0
209	Female	59	1	2	2021-01-08	1899-12-31 10:00:00	2021-01-08	1899-12-31 11:20:00	2021-01-15	7	1	Slight cold	Cerebral Infarction	2	0	2023-02-23	2	0	0	0	1	1	1	0	0	0	0	0	0	0	138	60	63	18	100	36.6	10	4	1	2	0	0	7.2	1	0	0	1	0	0
210	Female	76	1	1	2021-01-08	1899-12-31 11:00:00	2021-01-08	1899-12-31 11:20:00	2021-01-16	8	1	Slight cold	Cerebral Infarction	1	0	2022-09-28	1	0	0	0	1	1	0	0	0	0	0	1	0	0	180	102	68	20	100	36.2	15	5	4		0	0	6.3	1	0	0	0	0	0
211	Male	61	1	1	2021-01-08	1899-12-31 10:30:00	2021-01-08	1899-12-31 11:57:00	2021-01-28	20	1	Slight cold	Large Artery Atherosclerosis Type	2	0	2021-08-17	1	1	0	0	0	1	0	0	0	0	0	1	0	0	150	100	66	21	99	36.1	8	4	1	2	0	0	6.4	0	0	0	0	0	0
212	Male	82	2	1	2021-01-08	1899-12-31 13:00:00	2021-01-08	1899-12-31 19:57:00	2021-01-27	19	1	Slight cold	Cardioembolic Type	1	0	2021-01-29	1	1	0	0	1	1	0	0	0	0	0	0	0	0	167	104	134	20	95	36.5					0	0	10.9	1	0	0	1	0	0
213	Female	58	2	1	2021-01-10	1899-12-31 23:20:00	2021-01-11	1899-12-31	2021-01-17	6	1	Slight cold	Cardioembolic Type	3	0	2021-01-16	1	0	1	0	1	0	0	0	0	0	0	0	0	0	122	60	77	20	99	36.7	0	0	1	4	0	0	16.7	0	0	0	0	0	0
214	Male	70	2	2	2021-01-10	1899-12-31 15:00:00	2021-01-10	1899-12-31 15:18:00	2021-01-14	4	1	Slight cold	Large Artery Atherosclerosis Type	1	0	2022-08-08	1	0	0	0	0	1	0	0	0	0	0	1	0	0	134	90	89	14	100	36.2	1	1	1	2	0	0	4.9	1	0	0	0	0	0
215	Male	68	1	1	2021-01-11	1899-12-31 17:00:00	2021-01-12	1899-12-31 10:20:00	2021-01-26	14	1	Slight cold	Cardioembolic Type	1	0	2023-02-15	1	1	0	0	1	0	0	0	0	0	0	0	0	0	154	109	101	24	99	36.4	15	5	3	4	0	0	5.7	1	0	0	0	0	0
216	Male	47	1	1	2021-01-13	1899-12-31 07:00:00	2021-01-13	1899-12-31 14:50:00	2021-01-24	11	1	Slight cold	Cerebral Infarction	1	0	2021-01-24	1	0	0	0	0	0	0	0	0	0	0	0	0	0	130	92	76	18	100	37	0	1	1		0	0	5.1	0	0	1	0	1	0
217	Male	83	1	1	2021-01-14	1899-12-31 19:20:00	2021-01-14	1899-12-31 21:50:00	2021-02-09	26	1	Slight cold	Cardioembolic Type	1	0	2021-02-17	1	1	0	0	1	0	0	0	0	0	0	0	0	0	180	100	77	17	98	36.5	23	5	4	3	0	0	7.9	1	0	1	0	0	0
218	Female	75	1	1	2021-01-14	1899-12-31 06:00:00	2021-01-14	1899-12-31 23:30:00	2021-01-15	1	1	Slight cold	Cerebral Infarction	1	0	2021-01-15	1	1	1	0	0	0	0	0	0	0	0	0	0	0	167	121	106	21	96	36.7	19	5	5	3	0	0	11.9	1	0	0	0	0	0
219	Female	81	1	1	2021-01-16	1899-12-31 13:50:00	2021-01-16	1899-12-31 14:32:00	2021-01-19	3	1	Slight cold	Cerebral Infarction	1	0	2021-01-19	1	0	0	0	1	0	0	0	1	0	0	0	0	0	224	111	115	20	96	36.3	32	5	5	3	0	0	8.9	1	0	0	1	0	0
220	Male	79	1	1	2021-01-16	1899-12-31 19:30:00	2021-01-16	1899-12-31 20:23:00	2021-01-26	10	1	Slight cold	Lacunar Infarction due to Atherosclerosis	1	0	2021-05-26	1	1	0	0	0	1	0	0	0	0	0	0	0	1	175	101	134	30	96	37.4	9	4	4	4	0	0	6.3	1	0	0	0	1	0
221	Male	59	1	1	2020-01-03	1899-12-31 01:00:00	2020-01-03	1899-12-31 13:49:00	2020-01-10	7	1	Winter Solstice Festival	Large Artery Atherosclerosis Type	1	0	2021-07-26	1	0	0	0	0	0	0	0	0	0	0	0	0	0	177	88	91	17	100	36.5	1	1	1		0	0	6.5	1	0	1	0	0	0
222	Female	48	1	1	2020-01-04	1899-12-31 23:00:00	2020-01-05	1899-12-31 01:57:00	2020-01-14	9	1	Winter Solstice Festival	Large Artery Atherosclerosis Type	1	0	2020-03-26	1	0	0	0	0	0	0	0	0	0	0	0	0	0	126	80	75	20	97	36.5	7	4	1		0	0	7.2	0	0	0	0	1	0
223	Male	63	1	1	2020-01-04	1899-12-31 06:00:00	2020-01-04	1899-12-31 06:23:00	2020-01-09	5	1	Winter Solstice Festival	TIA	3	0	2023-04-04	1	0	0	1	0	1	0	0	0	0	0	0	0	0	182	109	99	20	99	36.8		5	2	3	0	0	6.9	1	0	1	1	1	0
224	Male	83	1	1	2020-01-05	1899-12-31 23:00:00	2020-01-06	1899-12-31 07:30:00	2020-01-26	20	1	Winter Solstice Festival	Large Artery Atherosclerosis Type	1	0	2020-01-21	1	0	0	1	1	0	0	0	0	0	0	0	1	0	130	81	80	20	98	36.9	2	3	1	7	0	0		1	0	0	1	0	0
225	Male	71	1	1	2020-01-06	1899-12-31 16:00:00	2020-01-06	1899-12-31 17:10:00	2020-01-17	11	1	Slight cold	TIA	3	0	2022-01-20	1	1	1	1	0	1	1	0	0	0	0	0	0	0	107	67	64	17	99	37	3				0	0	10.3	1	0	1	0	0	0
226	Male	62	2	1	2020-01-07	1899-12-31 16:30:00	2020-01-07	1899-12-31 19:32:00	2020-01-17	10	1	Slight cold	Large Artery Atherosclerosis Type	1	0	2023-02-27	1	0	0	0	0	0	0	0	0	0	0	0	0	0	162	97	104	20	99	36.5	3	4	1		0	0	20.9	1	0	0	0	1	0
227	Male	49	1	1	2020-01-07	1899-12-31 11:30:00	2020-01-07	1899-12-31 13:18:00	2020-01-15	8	1	Slight cold	Large Artery Atherosclerosis Type	1	0	2023-04-14	1	1	0	0	0	0	0	0	0	0	0	0	0	0	192	110	125	17	97	36.7	4	2	1	1	0	0	8.3	1	0	1	0	0	0
228	Male	46	1	1	2020-01-14	1899-12-31 00:30:00	2020-01-14	1899-12-31 07:17:00	2020-01-23	9	1	Slight cold	Small Artery Atherosclerotic Occlusion Type	1	0	2020-01-23	1	0	0	0	0	0	0	0	0	0	0	0	1	0	232	79	83	16	99	36.7	10	3	1		0	0	5.5	1	0	1	0	1	0
229	Male	57	2	1	2020-01-13	1899-12-31 22:00:00	2020-01-14	1899-12-31 08:06:00	2020-03-31	77	1	Slight cold	Intracerebral Hemorrhage	2	0	2020-03-31	1	1	0	0	0	0	0	0	0	0	0	0	1	1	217	139	66	17	99	36.8					0	0	9.4	0	0	0	0	0	0
230	Male	63	1	2	2020-01-14	1899-12-31 05:00:00	2020-01-14	1899-12-31 09:38:00	2020-02-02	19	1	Slight cold	Intracerebral Hemorrhage	2	0	2020-02-09	1	1	0	0	0	1	0	0	0	0	0	0	0	0	183	126	97	20	97	36.6					0	0	7.3	1	0	0	0	0	0
231	Male	65	1	1	2020-01-14	1899-12-31 13:00:00	2020-01-14	1899-12-31 22:14:00	2020-01-20	6	1	Slight cold	Large Artery Atherosclerosis Type	1	0	2020-11-14	1	1	1	0	0	0	0	0	0	0	0	1	0	0	140	86	80	20	100	36.7	6	4	1		0	0	8.9	1	0	0	0	0	0
232	Female	85	1	1	2020-01-15	1899-12-31 07:00:00	2020-01-15	1899-12-31 18:19:00	2020-01-24	9	1	Slight cold	Large Artery Atherosclerosis Type	1	0	2021-03-10	1	1	0	0	0	0	0	0	0	0	0	0	0	0	166	69	60	18	99	36.6	2	2	1	3	0	0	6.2	1	0	1	0	0	0
233	Male	56	2	1	2020-01-15	1899-12-31 22:00:00	2020-01-16	1899-12-31 03:45:00	2020-01-20	4	1	Slight cold	Intracerebral Hemorrhage	2	0	2020-01-20	1	0	0	0	0	0	0	0	0	0	0	0	0	1	213	144	65	20	98	37					0	0	7.3	0	0	0	0	0	0
234	Female	70	2	1	2020-01-18	1899-12-31 17:00:00	2020-01-18	1899-12-31 22:57:00	2020-01-28	10	1	Slight cold	Large Artery Atherosclerosis Type	1	0	2020-01-29	1	0	0	0	0	1	0	0	0	0	0	0	0	0	148	90	75	20	98	36.7	12	4	3		0	0	6.3	1	0	0	0	0	0
235	Male	50	1	1	2020-01-19	1899-12-31 16:30:00	2020-01-19	1899-12-31 17:27:00	2020-01-27	8	2	Major Cold	Intracerebral Hemorrhage	2	0	2020-01-26	2	1	0	0	0	0	0	0	0	0	0	1	0	0	182	114	116	20	100	36.7					0	0	7.7	0	0	0	0	0	0
236	Female	91	1	2	2020-01-21	1899-12-31 03:00:00	2020-01-21	1899-12-31 10:59:00	2020-03-25	64	1	Major Cold	Acute cerebral infarction	1	0	2020-12-06	2	1	0	1	0	1	0	0	1	0	0	0	0	0	147	95	87	18	95	36.7	13	4	4		0	0	8.5	1	0	0	0	0	0
237	Male	75	1	1	2020-01-21	1899-12-31 14:00:00	2020-01-21	1899-12-31 14:54:00	2020-01-27	6	1	Major Cold	Acute cerebral infarction	1	0	2023-03-24	1	0	0	1	1	1	0	0	1	0	0	0	0	0	98	54	76	18	99	37	4	2	1		0	0	6.4	1	0	1	0	1	0
238	Female	71	1	1	2020-01-20	1899-12-31 23:00:00	2020-01-21	1899-12-31 16:05:00	2020-02-03	13	1	Major Cold	Intracerebral Hemorrhage	2	0	2022-09-30	1	1	0	0	0	0	0	0	0	0	0	1	0	0	209	101	84	20	76	37.6	0	0	0		0	0	9.9	0	0	0	0	0	0
239	Female	82	1	1	2020-01-21	1899-12-31 14:00:00	2020-01-21	1899-12-31 18:18:00	2020-03-02	41	1	Major Cold	Cardioembolic Type	1	0	2022-06-24	2	1	0	1	1	1	0	0	1	0	0	0	0	0	131	113	94	21	100	37	9	4	4		0	0	6.4	1	0	0	0	0	0
240	Male	82	1	1	2020-01-22	1899-12-31 05:00:00	2020-01-22	1899-12-31 09:00:00	2020-02-04	13	1	Major Cold	Large Artery Atherosclerosis Type	1	0	2023-04-04	1	1	0	0	0	0	0	0	0	0	0	1	0	0	145	77	78	19	98	36.6	2	2		3	0	0	8.6	1	0	1	0	0	0
241	Female	72	1	1	2020-01-22	1899-12-31 18:50:00	2020-01-22	1899-12-31 19:20:00	2020-01-31	9	1	Major Cold	Large Artery Atherosclerosis Type	1	0	2020-03-20	1	0	0	0	1	1	0	0	0	0	0	1	0	0	169	109	110	20	98	36	20	5	2	3	0	0	5.3	0	0	0	0	0	0
242	Male	57	1	1	2020-01-26	1899-12-31 16:10:00	2020-01-26	1899-12-31 17:57:00	2020-03-05	39	1	Major Cold	Intracerebral Hemorrhage	2	116	2020-03-05	1	0	0	0	0	0	0	0	0	0	1	0	0	0	230	110	78	21	97	36.2	0	0	0	0	0	0	12.4	1	0	0	0	0	0
243	Male	67	1	2	2020-01-26	1899-12-31 02:00:00	2020-01-26	1899-12-31 18:15:00	2020-02-03	8	1	Major Cold	Large Artery Atherosclerosis Type	1	0	2020-02-03	1	0	0	0	0	1	0	0	0	0	0	0	0	0	166	87	75	19	97	36.7	14	4	2		0	0	7.4	1	0	1	0	1	0
244	Male	83	1	1	2020-01-27	1899-12-31 10:00:00	2020-01-27	1899-12-31 15:07:00	2020-03-25	58	2	Major Cold	Large Artery Atherosclerosis Type	1	0	2020-03-24	2	0	0	1	1	1	1	0	0	0	0	0	0	0	146	94	85	26	99	36.5	33	5	2		0	0	6.8	1	0	0	0	0	0
245	Male	62	1	1	2020-01-28	1899-12-31 21:00:00	2020-01-28	1899-12-31 22:00:00	2020-02-05	8	1	Major Cold	Large Artery Atherosclerosis Type	1	0	2022-02-14	1	1	0	0	0	1	0	0	0	0	0	0	1	0	169	76	86	20	100	36.8	9	4	1		0	0	5.7	1	0	0	0	0	0
246	Male	50	2	1	2020-01-29	1899-12-31 01:52:00	2020-01-29	1899-12-31 03:48:00	2020-02-04	6	1	Major Cold	Large Artery Atherosclerosis Type	1	0	2020-12-31	1	0	0	0	0	0	0	0	0	0	0	1	0	0	132	77	78	20	98	36.4	12	4	1	1	0	0	8.3	0	0	1	0	0	0
247	Male	62	1	2	2020-01-30	1899-12-31 16:30:00	2020-01-30	1899-12-31 16:53:00	2020-02-07	8	1	Major Cold	Large Artery Atherosclerosis Type	1	0	2022-02-14	1	1	0	0	0	1	0	0	0	0	0	0	1	1	169	100	81	20	98	36.6	9	4	1		0	0	5.7	1	0	0	0	0	0
248	Male	70	1	2	2020-01-30	1899-12-31 02:00:00	2020-01-30	1899-12-31 14:06:00	2020-02-05	6	1	Major Cold	Acute cerebral infarction	1	0	2020-02-05	1	0	0	0	0	1	0	0	0	0	0	0	0	0	206	110	96	20	96	37.1	13	4	2		0	0	8.6	1	0	0	0	0	0
249	Male	69	1	1	2020-01-30	1899-12-31 20:30:00	2020-01-30	1899-12-31 21:21:00	2020-01-31	1	1	Major Cold	Intracerebral Hemorrhage	2	0	2020-01-31	1	1	0	0	0	0	0	0	0	0	0	1	0	0	240	115	49	15	96	36.3	0	0	0	0	0	0	9.2	0	0	0	0	0	0
250	Male	46	2	1	2020-01-31	1899-12-31 10:00:00	2020-01-31	1899-12-31 15:46:00	2020-03-30	59	1	Major Cold	Acute cerebral infarction	1	0	2020-05-10	1	0	0	0	0	0	0	0	0	0	0	0	0	0	91	51	77	20	98	36.8	21	5	4		0	0	9.9	1	0	0	0	0	1
251	Female	71	2	1	2020-01-31	1899-12-31 17:10:00	2020-01-31	1899-12-31 19:10:00	2020-02-07	7	1	Major Cold	Small Artery Occlusion Type	1	0	2021-06-03	1	0	1	0	0	0	0	0	0	0	0	0	0	0	159	89	89	20	100	36.5	5	3	1	1	0	0	12.3	1	0	0	0	0	0
252	Male	62	2	1	2020-01-31	1899-12-31 16:00:00	2020-01-31	1899-12-31 16:40:00	2020-02-01	1	1	Major Cold	Small Artery Occlusion Type	1	0	2020-02-01	1	1	0	0	0	0	0	0	0	0	0	0	0	1	104	63	72	20	95	36.3	13	5	1		0	0	6.1	0	0	0	0	0	0
253	Male	66	1	1	2020-02-01	1899-12-31 10:30:00	2020-02-01	1899-12-31 17:07:00	2020-02-16	15	1	Major Cold	Large Artery Atherosclerosis Type	1	0	2020-03-02	1	1	0	0	0	0	0	0	0	0	0	1	0	0	157	89	84	20	98	37	18	5	4		0	0	6.6	1	1	0	0	0	0
254	Male	70	2	1	2020-02-01	1899-12-31 09:00:00	2020-02-01	1899-12-31 11:56:00	2020-02-04	3	2	Major Cold	Intracerebral Hemorrhage	1	0	2020-02-03	2	1	0	0	0	1	0	0	0	0	0	0	0	0	167	97	88	20	100	36.5	21	5	5		0	0	9.1	0	0	0	0	0	1
255	Female	65	1	1	2020-02-02	1899-12-31 12:30:00	2020-02-02	1899-12-31 13:27:00	2020-02-07	5	1	Major Cold	TIA	3	0	2020-05-06	1	1	1	0	0	1	0	0	0	0	0	1	0	0	157	74	63	12	100	36.3	0	0	1		0	0	11.4	1	0	0	0	0	0
256	Male	57	1	1	2020-02-02	1899-12-31 21:20:00	2020-02-02	1899-12-31 23:30:00	2020-02-12	10	1	Major Cold	Acute cerebral infarction	1	0	2020-03-13	1	0	0	0	0	0	0	0	0	0	0	0	0	0	182	102	82	18	100	37	10	4	3	1	0	0	6.1	1	0	1	0	1	0
257	Male	51	1	1	2020-02-02	1899-12-31 20:00:00	2020-02-03	1899-12-31 16:58:00	2020-03-28	54	1	Major Cold	Acute cerebral infarction	1	0	2020-03-28	1	1	0	1	0	1	0	0	1	0	0	0	0	0	158	102	104	21	97	37.8	28	5	5		0	0	7.2	0	1	0	0	0	0
258	Female	71	2	1	2020-02-02	1899-12-31 14:10:00	2020-02-02	1899-12-31 17:25:00	2020-02-11	9	1	Major Cold	Large Artery Atherosclerosis Type	1	0	2023-04-09	1	0	1	0	0	0	0	0	0	0	0	0	0	0	120	62	72	19	98	36.5	4	3	1	3	0	0	7.5	1	0	0	0	0	0
259	Female	84	2	1	2020-02-05	1899-12-31 02:00:00	2020-02-05	1899-12-31 09:05:00	2020-02-13	8	1	Start of Spring	Large Artery Atherosclerosis Type	1	0	2022-04-09	1	1	0	0	0	0	0	0	0	0	0	0	0	0	141	87	99	20	98	37	11	5	1		0	0	5.4	1	0	1	0	1	0
260	Female	88	1	1	2020-02-05	1899-12-31 16:00:00	2020-02-05	1899-12-31 16:20:00	2020-02-14	9	1	Start of Spring	Large Artery Atherosclerosis Type	1	0	2020-02-17	1	1	0	1	1	1	0	0	0	0	0	0	0	0	127	73	90	17	97	36.3	12	4	2	7	0	0	9.9	1	0	0	0	0	1
261	Female	72	1	1	2020-02-10	1899-12-31 13:40:00	2020-02-10	1899-12-31 15:50:00	2020-02-14	4	1	Start of Spring	Cardioembolic Type	1	0	2020-02-14	1	0	0	0	0	0	0	0	0	0	0	0	0	0	140	89	76	20	100	36	17	5	4		0	0	7.2	1	0	0	0	0	1
262	Male	53	1	1	2020-02-10	1899-12-31 11:30:00	2020-02-10	1899-12-31 12:56:00	2020-02-11	1	1	Start of Spring	Acute cerebral infarction	1	0	2020-02-11	1	0	0	0	0	0	0	0	0	0	0	0	0	0	136	90	75	20	98	36.7	17	4	2		0	0	10	1	0	0	0	0	0
263	Female	59	2	1	2020-02-10	1899-12-31 13:00:00	2020-02-10	1899-12-31 20:34:00	2020-02-18	8	1	Start of Spring	Large Artery Atherosclerosis Type	1	0	2023-01-08	1	1	0	0	0	1	0	0	0	0	0	0	0	0	186	98	74	18	98	36.1	2	2	2	2	0	0	5.7	1	0	0	1	1	0
264	Male	76	1	1	2020-02-10	1899-12-31 20:02:00	2020-02-10	1899-12-31 20:25:00	2020-02-17	7	1	Start of Spring	TIA	3	0	2022-06-28	1	1	0	0	0	0	0	0	0	0	0	1	0	0	187	76	71	20	98	37				3	0	0	6.8	1	0	1	0	1	0
265	Female	87	1	1	2020-02-11	1899-12-31 16:30:00	2020-02-11	1899-12-31 22:34:00	2020-02-20	9	1	Start of Spring	Cardioembolic Type	1	0	2020-02-21	1	0	0	0	0	0	0	0	0	0	0	0	0	0	166	79	97	24	97	36.6	19	4	4		0	0	7.9	1	0	0	0	0	0
266	Female	84	1	1	2020-02-15	1899-12-31 17:00:00	2020-02-15	1899-12-31 20:15:00	2020-02-20	5	1	Start of Spring	Acute cerebral infarction	1	0	2021-12-28	1	1	0	1	0	0	0	0	0	0	0	1	0	0	192	82	67	18	99	36.5	2	2	1		0	0	7.5	0	0	1	0	0	0
267	Male	66	2	1	2020-02-17	1899-12-31 03:00:00	2020-02-17	1899-12-31 03:20:00	2020-04-09	52	1	Start of Spring	Intracerebral Hemorrhage	2	0	2020-10-28	1	1	1	0	0	0	0	0	0	0	0	0	0	0	175	94	92	22	97	36.6					0	0	13.3	0	0	0	0	0	0
268	Male	62	1	1	2020-02-17	1899-12-31	2020-02-17	1899-12-31 13:14:00	2020-03-01	13	1	Start of Spring	Intracerebral Hemorrhage	2	0	2022-04-07	1	1	1	0	0	0	1	0	0	0	0	0	0	0	184	103	88	16	98	36.6					0	0	6.5	1	0	0	0	0	0
269	Male	66	1	1	2020-02-17	1899-12-31 03:00:00	2020-02-17	1899-12-31 13:19:00	2020-02-25	8	1	Start of Spring	Large Artery Atherosclerosis Type	1	0	2020-04-19	1	1	1	1	0	1	0	0	0	0	0	0	0	0	162	80	71	20	99	36.8	4	1	1	4	0	0	18.7	1	0	0	0	1	0
270	Female	87	1	1	2020-02-17	1899-12-31 22:00:00	2020-02-17	1899-12-31 23:17:00	2020-02-23	6	1	Start of Spring	Large Artery Atherosclerosis Type	1	0	2021-05-10	1	1	0	1	0	1	0	0	0	0	0	1	0	0	194	98	92	20	98	36.7	4	2	1		0	0	8	1	0	0	0	1	0
271	Male	60	1	1	2020-02-18	1899-12-31 00:10:00	2020-02-18	1899-12-31 07:16:00	2020-02-24	6	1	Start of Spring	Large Artery Atherosclerosis Type	1	0	2020-02-24	1	1	0	0	0	1	0	0	0	0	0	0	0	0	177	100	87	14	100	36.1	13	4	2		0	0	7.5	0	1	0	0	0	0
272	Female	54	1	1	2020-02-20	1899-12-31 14:00:00	2020-02-20	1899-12-31 19:58:00	2020-02-28	8	2	Rain Wate	Intracerebral Hemorrhage	2	0	2020-02-28	2	1	0	0	0	0	0	0	0	0	0	0	0	0	270	118	63	21	99	36					0	0	12.5	0	0	0	0	0	0
273	Female	61	1	1	2020-02-20	1899-12-31 14:30:00	2020-02-20	1899-12-31 21:05:00	2020-02-29	9	1	Rain Wate	Large Artery Atherosclerosis Type	1	0	2020-11-09	1	1	0	0	0	0	0	0	0	0	0	0	0	0	132	110	91	19	100	36.7	4	3	1		0	0	8.2	1	0	0	0	1	0
274	Female	91	2	1	2020-02-25	1899-12-31	2020-02-25	1899-12-31 10:15:00	2020-03-06	10	1	Rain Wate	Acute cerebral infarction	1	0	2021-04-01	1	0	0	0	0	0	0	0	0	0	0	0	0	0	194	77	67	20	100	36.5	6	4	2		0	0	9	0	0	1	0	0	0
275	Male	51	1	1	2020-02-27	1899-12-31	2020-02-27	1899-12-31 11:56:00	2020-03-16	18	1	Rain Wate	Large Artery Atherosclerosis Type	1	0	2020-04-14	1	1	0	0	0	0	0	0	0	0	0	0	1	0	152	81	71	20	98	36.8	6	6	2		0	0	7	1	1	0	0	0	0
276	Male	73	1	1	2020-02-27	1899-12-31 09:00:00	2020-02-27	1899-12-31 14:36:00	2020-03-05	7	1	Rain Wate	Acute cerebral infarction	1	0	2022-12-07	1	1	0	0	0	1	0	1	0	0	0	0	1	1	140	72	72	20	98	36.4	10	4	2		0	0	7.2	1	0	0	0	0	1
277	Male	79	1	1	2020-02-28	1899-12-31 04:00:00	2020-02-28	1899-12-31 09:00:00	2020-03-01	2	1	Rain Wate	Large Artery Atherosclerosis Type	1	0	2020-03-01	1	1	1	0	0	0	0	0	0	0	0	1	0	0	178	100	88	20	98	36	26	5			0	0	7.1	1	1	0	0	0	0
278	Male	40	1	1	2020-02-25	1899-12-31 20:50:00	2020-02-26	1899-12-31 20:22:00	2020-03-09	12	1	Rain Wate	Intracerebral Hemorrhage	2	2	2020-03-30	1	0	0	0	0	0	0	0	0	0	0	0	1	0	149	70	82	19	100	36.7					0	0	5.1	0	0	0	0	0	0
279	Male	62	1	1	2020-02-29	1899-12-31 08:00:00	2020-02-29	1899-12-31 14:03:00	2020-03-11	11	1	Rain Wate	Cerebral Infarction	1	0	2020-03-11	1	1	0	0	0	1	0	0	0	0	0	0	0	0	167	101	62	20	100	36.5	10	4	5		0	0	6.3	1	1	0	0	0	0
280	Male	74	2	1	2020-02-29	1899-12-31 16:00:00	2020-02-29	1899-12-31 17:05:00	2020-03-10	10	1	Rain Wate	Intracerebral Hemorrhage	2	5	2020-10-30	1	0	0	0	0	0	0	1	0	0	0	0	0	0	158	95	70	20	100	36.5					0	0	7.1	0	0	0	0	0	0
281	Male	87	1	1	2020-03-05	1899-12-31 19:30:00	2020-03-05	1899-12-31 20:30:00	2020-03-13	8	1	Awakening of Insects	Large Artery Atherosclerosis Type	1	0	2020-03-13	1	1	0	0	0	0	0	0	0	0	0	1	0	0	168	98	95	21	98	36.6	6	3	2	4	0	0	8.5	1	0	1	0	0	0
282	Female	71	1	1	2020-03-05	1899-12-31	2020-03-05	1899-12-31 05:00:00	2020-03-11	6	1	Awakening of Insects	Large Artery Atherosclerosis Type	1	0	2023-02-11	1	0	0	0	0	0	0	0	0	0	0	1	0	0	165	116	122	21	99	36.5	5	1	1	2	0	0	6.6	1	0	0	0	0	0
283	Female	80	1	1	2020-03-06	1899-12-31 17:50:00	2020-03-06	1899-12-31 23:53:00	2020-03-15	9	1	Awakening of Insects	Cardioembolic Type	1	0	2021-05-26	1	1	0	0	1	0	0	0	0	0	0	0	0	0	150	89	80	19	99	36.3	6	4	2		0	0	8.5	0	0	1	1	0	0
284	Male	53	2	1	2020-03-08	1899-12-31 07:30:00	2020-03-08	1899-12-31 10:14:00	2020-03-17	9	1	Awakening of Insects	Acute cerebral infarction	1	0	2020-11-13	1	1	1	0	0	1	0	0	0	0	0	0	1	0	162	90	80	20	100	36.2	2	4	1		0	0	11.4	1	0	0	0	1	0
285	Male	69	1	1	2020-03-07	1899-12-31 15:00:00	2020-03-08	1899-12-31 11:40:00	2020-03-25	17	1	Awakening of Insects	Large Artery Atherosclerosis Type	1	0	2020-03-25	1	1	0	0	0	0	0	0	0	0	0	0	1	1	211	133	93	25	98	36.5	17	4	4	3	0	0	7	0	0	1	0	1	0
286	Female	89	1	1	2020-03-08	1899-12-31 11:00:00	2020-03-08	1899-12-31 12:08:00	2020-03-16	8	1	Awakening of Insects	Cardioembolic Type	1	0	2020-03-16	1	1	0	0	1	1	0	0	0	0	0	0	0	0	155	89	68	20	100	36	18	4		5	0	0	7.7	1	0	1	0	0	0
287	Female	63	1	1	2020-03-09	1899-12-31 18:30:00	2020-03-09	1899-12-31 19:38:00	2020-04-04	26	2	Awakening of Insects	Large Artery Atherosclerosis Type	1	0	2020-04-04	2	1	0	0	0	0	0	0	0	0	0	0	0	0	202	124	76	20	99	36.1	7	4	5		0	0	8.3	0	0	0	1	0	0
288	Male	75	1	1	2020-03-13	1899-12-31 23:00:00	2020-03-14	1899-12-31 09:05:00	2020-05-11	58	1	Awakening of Insects	Cerebral Infarction	1	0	2020-06-18	1	1	0	0	0	0	0	0	0	0	0	1	0	0	155	119	95	18	98	36.8	16	4	1		0	0	5.7	1	1	1	0	0	0
289	Male	49	1	1	2020-03-13	1899-12-31 21:00:00	2020-03-14	1899-12-31 09:55:00	2020-04-01	18	1	Awakening of Insects	Large Artery Atherosclerosis Type	1	0	2020-04-01	1	0	0	0	0	0	0	0	0	0	0	0	0	0	158	101	72	18	99	36.3	12	4	4		0	0	7.2	0	1	0	0	0	0
290	Male	44	1	1	2020-03-14	1899-12-31 14:30:00	2020-03-14	1899-12-31 14:50:00	2020-03-15	1	1	Awakening of Insects	Intracerebral Hemorrhage	2	0	2021-01-13	2	1	0	0	0	0	0	0	0	0	0	0	0	0	250	128	107	22	74	36.3					0	0	12.2	0	0	0	0	0	0
291	Male	55	2	1	2020-03-14	1899-12-31 16:20:00	2020-03-14	1899-12-31 21:23:00	2020-03-24	10	1	Awakening of Insects	Large Artery Atherosclerosis Type	1	0	2020-03-24	1	1	1	0	0	0	0	0	0	0	0	1	0	0	119	76	76	20	100	36.7	2	2	1	2	0	0	10.8	1	0	0	0	0	0
292	Female	74	1	1	2020-03-15	1899-12-31 02:00:00	2020-03-15	1899-12-31 02:45:00	2020-03-25	10	1	Awakening of Insects	Large Artery Atherosclerosis Type	1	0	2022-04-06	1	0	0	1	0	0	0	0	0	0	0	1	0	0	181	79	56	16	98	36.5	7	4	1		0	0	6.3	1	0	0	0	1	0
293	Male	67	1	1	2020-03-16	1899-12-31 16:15:00	2020-03-16	1899-12-31 17:30:00	2020-03-25	9	1	Awakening of Insects	Acute cerebral infarction	3	0	2023-03-21	1	1	0	0	0	0	0	0	0	0	0	1	0	0	181	92	74	18	97	36.6	2	1	1		0	0	7.8	1	0	1	0	1	0
294	Male	75	2	2	2020-03-18	1899-12-31 20:40:00	2020-03-18	1899-12-31 21:44:00	2020-03-31	13	1	Awakening of Insects	Cardioembolic Type	1	0	2022-04-09	1	1	0	0	1	1	0	0	0	0	0	0	1	0	222	111	90	18	97	36.8	9	4	1	4	0	0	8.1	1	0	0	0	1	0
295	Male	50	2	1	2020-03-19	1899-12-31 22:00:00	2020-03-19	1899-12-31 23:34:00	2020-03-24	5	1	Awakening of Insects	Large Artery Atherosclerosis Type	1	0	2020-03-31	1	0	0	0	0	0	0	0	0	0	0	0	1	0	127	81	90	25	98	36.5	6	2	1	1	0	0	5.9	1	0	0	1	0	0
296	Male	70	1	1	2020-03-19	1899-12-31 04:00:00	2020-03-19	1899-12-31 10:14:00	2020-03-30	11	1	Awakening of Insects	Intracerebral Hemorrhage	2	0	2020-03-31	1	1	0	0	0	1	0	0	0	0	0	1	0	0	187	110	96	20	99	36.6					0	0	7.8	0	0	0	0	0	0
297	Female	50	1	1	2020-03-19	1899-12-31 10:00:00	2020-03-19	1899-12-31 12:40:00	2020-03-25	6	1	Awakening of Insects	Large Artery Atherosclerosis Type	1	0	2020-12-23	1	1	0	0	0	0	0	0	0	0	0	1	0	0	211	116	63	20	99	36.8	3	1	1	1	0	0	9.8	0	0	0	0	0	0
298	Male	73	1	1	2020-03-19	1899-12-31 11:30:00	2020-03-19	1899-12-31 13:16:00	2020-03-26	7	1	Awakening of Insects	Large Artery Atherosclerosis Type	1	0	2022-08-10	1	1	0	1	0	0	0	1	0	0	0	1	0	0	118	99	76	20	100	36.1	2	1	1	3	0	0	7	1	1	0	1	0	0
299	Female	75	1	1	2020-03-22	1899-12-31 10:00:00	2020-03-22	1899-12-31 17:30:00	2020-03-30	8	1	Vernal Equinox	Large Artery Atherosclerosis Type	1	0	2020-03-30	1	1	0	0	0	0	0	0	0	0	0	1	0	0	188	104	109	19	98	36.7	5	2	2		0	0	6.7	1	0	0	0	1	0
300	Male	75	1	1	2020-03-26	1899-12-31 09:30:00	2020-03-26	1899-12-31 12:15:00	2020-03-27	1	1	Vernal Equinox	Large Artery Atherosclerosis Type	1	0	2020-03-27	1	1	0	0	0	0	0	0	0	0	0	1	1	0	193	93	70	18	98	36.5	3	2	1		0	0	5.1	1	0	0	0	1	0
301	Male	44	1	1	2020-04-03	1899-12-31 22:00:00	2020-04-04	1899-12-31 03:15:00	2020-04-16	12	1	Qingming	Cerebral Infarction	1	0	2020-06-12	1	0	0	0	0	0	0	0	0	0	0	0	0	0	104	66	64	18	99	36.7	21	5	4		0	0	6.7	1	0	1	0	0	1
302	Male	75	1	1	2020-04-04	1899-12-31 22:00:00	2020-04-05	1899-12-31 06:40:00	2020-04-24	19	1	Qingming	Large Artery Atherosclerosis Type	1	0	2020-04-24	1	1	0	0	1	0	0	0	0	0	0	0	0	0	170	110	108	21	100	36.1	19	5	4		0	0	7.8	0	1	0	0	0	0
303	Male	88	1	2	2020-04-06	1899-12-31 21:30:00	2020-04-06	1899-12-31 22:33:00	2020-04-13	7	1	Qingming	Large Artery Atherosclerosis Type	1	0	2020-12-15	1	1	1	0	0	1	0	0	0	0	0	1	0	0	160	90	77	18	98	36.6	4	2	1		0	0	15.1	1	0	0	0	0	0
304	Male	70	1	1	2020-04-07	1899-12-31 09:30:00	2020-04-07	1899-12-31 17:32:00	2020-04-14	7	1	Qingming	Large Artery Atherosclerosis Type	1	0	2020-04-14	1	1	0	0	0	1	0	0	0	0	0	1	0	0	180	101	107	20	98	36.3	6	4	1		0	0	5.6	0	0	1	0	1	0
305	Female	77	2	1	2020-04-08	1899-12-31 14:00:00	2020-04-08	1899-12-31 20:46:00	2020-04-14	6	1	Qingming	Large Artery Atherosclerosis Type	1	0	2020-04-14	1	0	0	0	0	1	0	0	0	0	0	0	0	0	139	64	82	29	100	37	21	5	4		0	0	6.4	0	0	0	1	0	1
306	Female	62	1	2	2020-04-12	1899-12-31 04:00:00	2020-04-12	1899-12-31 08:43:00	2020-04-24	12	1	Qingming	Cardioembolic Type	1	0	2020-07-14	1	0	0	0	0	1	0	0	0	0	0	1	0	0	125	62	137	29	98	36.9	7	4	2		0	0	6.8	1	0	1	0	1	1
307	Male	60	1	1	2020-04-12	1899-12-31 10:00:00	2020-04-12	1899-12-31 13:12:00	2020-04-20	8	1	Qingming	Intracerebral Hemorrhage	2	20	2020-04-20	1	1	1	0	0	1	0	0	0	0	0	0	0	0	174	102	147	32	100	36.7					0	0	10.6	0	0	0	0	0	0
308	Male	58	1	1	2020-04-14	1899-12-31 14:30:00	2020-04-14	1899-12-31 15:40:00	2020-04-23	9	1	Qingming	Large Artery Atherosclerosis Type	1	0	2023-01-10	1	1	1	0	0	1	0	0	0	0	0	1	0	0	128	80	98	20	98	36.5	4	2	1		0	0	9.7	1	0	0	0	1	0
309	Male	70	1	1	2020-04-16	1899-12-31 20:00:00	2020-04-17	1899-12-31 00:16:00	2020-07-20	94	2	Qingming	Intracerebral Hemorrhage	2	49	2020-07-18	2	1	1	0	0	0	0	0	0	0	0	1	0	0	124	78	103	20	98	36.3					0	0	11.8	0	0	0	0	0	0
310	Female	86	1	1	2020-04-16	1899-12-31 19:00:00	2020-04-17	1899-12-31 00:25:00	2020-04-20	3	1	Qingming	Intracerebral Hemorrhage	2	9	2020-04-20	1	0	0	0	0	0	0	0	0	0	0	0	0	0	219	112	98	18		36.5					0	0
311	Male	82	1	1	2020-04-15	1899-12-31 23:00:00	2020-04-16	1899-12-31 07:52:00	2020-04-28	12	1	Qingming	Large Artery Atherosclerosis Type	1	0	2022-10-27	1	0	1	1	0	1	0	0	0	0	0	0	1	0	149	82	85	17	98	36.3	11	5	2		0	0	11.6	1	0	0	0	0	0
312	Male	83	1	1	2020-04-17	1899-12-31 02:00:00	2020-04-17	1899-12-31 10:40:00	2020-04-23	6	1	Qingming	Cerebral Infarction	1	0	2021-07-04	1	0	0	0	0	0	0	0	0	0	0	0	0	0	176	94	63	20	100	36.7	2	1	1		0	0	6.3	0	0	1	0	1	0
313	Female	79	1	1	2020-04-20	1899-12-31 17:40:00	2020-04-20	1899-12-31 18:19:00	2020-05-05	15	1	Grain Rain	Intracerebral Hemorrhage	2	1	2023-01-12	1	0	0	0	0	1	0	0	0	0	0	0	0	0	189	116	93	20	98	36.8	3	4	2		0	0	8	1	0	0	0	1	0
314	Male	61	1	1	2020-04-23	1899-12-31 22:00:00	2020-04-24	1899-12-31 05:02:00	2020-05-07	13	1	Grain Rain	Large Artery Atherosclerosis Type	1	0	2020-11-09	1	1	1	1	0	0	0	0	0	0	0	0	0	0	130	82	95	20	98	36.5	24	5	4	4	0	0	9	1	1	0	0	0	0
315	Male	51	1	1	2020-04-23	1899-12-31 22:00:00	2020-04-24	1899-12-31 18:46:00	2020-05-10	16	1	Grain Rain	Acute cerebral infarction	1	0	2020-07-24	1	1	0	0	0	1	0	0	0	0	0	0	0	0	131	96	103	30	96	37	16	5	1		0	0	6.6	0	0	1	0	0	0
316	Female	81	2	1	2020-04-24	1899-12-31 22:00:00	2020-04-25	1899-12-31 08:35:00	2020-05-06	11	1	Grain Rain	Intracerebral Hemorrhage	2	0	2020-08-28	1	1	0	0	0	0	0	0	0	0	0	1	0	0	166	97	97	15	95	36.5					0	0	6.8	1	0	1	0	0	0
317	Female	66	1	1	2020-05-01	1899-12-31 16:00:00	2020-05-02	1899-12-31 08:36:00	2020-05-12	10	1	Grain Rain	Cerebral Infarction	1	0	2022-06-08	1	0	0	0	0	0	0	0	0	0	0	1	0	0	125	92	58	16	99	36	2	2	1		0	0	5.5	1	0	1	0	1	0
318	Female	70	1	1	2020-05-02	1899-12-31 07:00:00	2020-05-02	1899-12-31 17:10:00	2020-05-13	11	1	Grain Rain	Large Artery Atherosclerosis Type	1	0	2020-05-13	1	0	0	0	0	0	0	0	0	0	0	0	0	0	171	101	70	22	99	36	15	5	2		0	0	5.6	1	0	1	0	0	0
319	Male	71	1	1	2020-05-02	1899-12-31 14:00:00	2020-05-02	1899-12-31 20:20:00	2020-05-11	9	1	Grain Rain	Cerebral Infarction	1	0	2023-03-31	1	1	0	0	0	0	1	0	0	0	0	0	0	0	194	118	71	17	99	36.5	5	2	1		0	0	6	1	0	0	1	1	0
320	Female	78	1	1	2020-05-03	1899-12-31 15:40:00	2020-05-03	1899-12-31 16:23:00	2020-05-12	9	1	Grain Rain	Large Artery Atherosclerosis Type	1	0	2020-05-12	1	0	0	1	0	1	0	0	0	0	0	1	0	0	147	89	70	20	99	36.5	4	3	2		0	0	6.8	1	0	1	0	0	0
321	Male	73	1	1	2020-05-03	1899-12-31 07:30:00	2020-05-03	1899-12-31 15:15:00	2020-05-13	10	1	Grain Rain	Large Artery Atherosclerosis Type	1	0	2020-05-13	1	0	0	0	0	0	0	0	0	0	0	0	0	0	148	78	86	20		36.7	26	5	5	1	0	0		1	1	1	0	1	0
322	Male	92	2	1	2020-05-08	1899-12-31 10:35:00	2020-05-08	1899-12-31 12:15:00	2020-05-17	9	1	Beginning of Summer	Large Artery Atherosclerosis Type	1	0	2022-09-26	1	1	1	1	0	0	0	0	0	0	0	0	0	0	166	75	60	20	96	36.6	2	1	1	2	0	0	9.8	0	0	1	0	0	0
323	Male	55	2	1	2020-05-08	1899-12-31 12:00:00	2020-05-08	1899-12-31 13:55:00	2020-05-20	12	1	Beginning of Summer	Large Artery Atherosclerosis Type	1	0	2022-02-24	1	1	0	0	0	0	0	0	0	0	0	0	1	1	165	95	109	20	98	36.3	8	4	1		0	0	10.2	1	0	0	0	1	0
324	Male	70	1	1	2020-05-10	1899-12-31 20:05:00	2020-05-10	1899-12-31 20:35:00	2020-05-23	13	1	Beginning of Summer	Large Artery Atherosclerosis Type	1	0	2022-06-29	1	1	0	0	0	1	0	0	0	0	0	0	0	0	206	101	102	22	98	36.7	4	3	1		0	0	6.1	1	1	0	0	0	0
325	Male	62	1	1	2020-05-10	1899-12-31 21:42:00	2020-05-10	1899-12-31 23:49:00	2020-05-27	17	2	Beginning of Summer	Acute cerebral infarction	1	0	2020-05-24	2	1	0	1	1	1	0	0	1	0	0	0	0	0	180	103	73	22	95	36.3	1	2	1		0	0	5.7	0	0	0	0	0	0
326	Male	71	2	1	2020-05-12	1899-12-31 03:00:00	2020-05-12	1899-12-31 13:37:00	2020-05-22	10	1	Beginning of Summer	Large Artery Atherosclerosis Type	1	0	2020-05-22	1	1	1	0	0	0	0	0	0	0	0	1	0	0	132	86	68	20	100	36.3	6	4	1		0	0	7.2	1	0	0	0	1	0
327	Male	80	1	1	2020-05-14	1899-12-31 12:30:00	2020-05-14	1899-12-31 17:24:00	2020-06-12	29	2	Beginning of Summer	Intracerebral Hemorrhage	2	31	2020-06-11	2	0	0	0	1	1	0	0	1	0	1	0	0	0	153	93	93	20	97	36.4					0	0	7	0	0	1	0	0	0
328	Male	50	2	1	2020-05-15	1899-12-31 20:30:00	2020-05-16	1899-12-31 12:35:00	2020-05-27	11	1	Beginning of Summer	Large Artery Atherosclerosis Type	1	0	2023-01-20	1	0	0	0	0	0	0	0	0	0	0	0	0	0	172	90	63	18	99	36.3	3	3	1		0	0	11.3	1	0	0	0	1	0
329	Female	71	1	1	2020-05-17	1899-12-31 16:00:00	2020-05-17	1899-12-31 19:13:00	2020-05-25	8	1	Beginning of Summer	Cerebral Infarction	1	0	2023-04-08	1	1	1	0	0	0	0	0	0	0	0	0	0	0	116	74	109	24	97	38	2	2	1		0	0	9	1	0	0	0	0	0
330	Female	81	1	1	2020-05-21	1899-12-31 03:00:00	2020-05-21	1899-12-31 07:50:00	2020-05-28	7	1	Beginning of Summer	Acute cerebral infarction	1	0	2020-05-28	1	0	0	0	0	0	0	0	1	0	0	0	0	0	144	84	105	20	98	36.6					0	0	6.8
331	Male	68	1	2	2020-05-25	1899-12-31 15:10:00	2020-05-25	1899-12-31 15:55:00	2020-06-05	11	1	Grain Buds	Large Artery Atherosclerosis Type	1	0	2021-02-05	1	1	1	1	0	1	0	0	0	0	0	0	0	0	112	72	58	14	98	36.1	9	5	2		0	0	8.7	1	0	0	1	1	0
332	Female	34	1	1	2020-05-26	1899-12-31 15:30:00	2020-05-26	1899-12-31 15:57:00	2020-06-30	35	1	Grain Buds	Intracerebral Hemorrhage	2	32	2021-02-05	1	0	0	0	0	0	0	0	0	0	0	0	0	0	135	95	98	20	98	36.5					0	0	5.5	0	0	0	0	0	0
333	Male	52	2	1	2020-05-30	1899-12-31 14:41:00	2020-05-30	1899-12-31 16:34:00	2020-06-04	5	1	Grain Buds	Large Artery Atherosclerosis Type	1	0	2020-06-04	1	1	0	0	0	0	0	0	0	0	0	0	0	0	170	110	72	18	98	36.1	5	3	1		0	0	4	1	0	0	0	0	0
334	Female	76	1	2	2020-06-01	1899-12-31 19:40:00	2020-06-01	1899-12-31 22:23:00	2020-06-11	10	1	Grain Buds	Small Artery Occlusion Type	1	0	2021-08-10	1	1	0	0	0	0	0	0	0	0	0	1	0	0	134	72	66	20	99	36.7	6	3	1		0	0	11.2	1	0	0	0	0	0
335	Female	54	2	2	2020-06-03	1899-12-31 10:30:00	2020-06-03	1899-12-31 13:40:00	2020-06-23	20	1	Grain Buds	Acute cerebral infarction	1	0	2022-06-30	1	0	0	0	0	1	0	0	0	0	0	0	0	0	102	53	56	16	99	36.5	6	3			0	0	4.7	1	0	1	0	0	0
336	Female	87	2	1	2020-06-03	1899-12-31 13:30:00	2020-06-03	1899-12-31 21:44:00	2020-06-15	12	2	Grain Buds	Acute cerebral infarction	1	0	2020-06-15	2	1	0	1	0	0	0	0	0	0	0	0	0	0	151	85	78	21	98	36.7	14	5	2		0	0	8	0	0	0	0	0	1
337	Male	65	2	1	2020-06-05	17;48	2020-06-05	1899-12-31 18:33:00	2020-06-11	6	1	Grain in ear	TIA	3	0	2023-04-06	1	1	0	0	0	1	0	0	0	0	0	0	1	0	194	111	76	18	98	36.4	0	1	1		0	0	7.7	1	0	0	0	1	0
338	Male	63	2	1	2020-06-07	1899-12-31 17:30:00	2020-06-07	1899-12-31 19:21:00	2020-06-12	5	1	Grain in ear	TIA	3	0	2022-11-22	1	1	0	0	0	0	0	0	0	0	0	0	0	0	144	69	81	18	96	36.7	1	1	1		0	0	8.1	0	0	1	0	1	0
339	Female	62	1	1	2020-06-08	1899-12-31 23:00:00	2020-06-08	1899-12-31 11:55:00	2020-06-19	11	1	Grain in ear	Large Artery Atherosclerosis Type	1	0	2023-04-03	1	0	1	0	0	1	0	0	0	0	0	1	0	0	142	98	76	20	100	36.7	5	3	1		0	0	10	1	0	1	0	0	0
340	Female	82	2	1	2020-06-10	1899-12-31 13:00:00	2020-06-10	1899-12-31 21:28:00	2020-06-16	6	1	Grain in ear	Stroke	2	113	2020-06-16	1	1	0	0	0	0	0	0	0	0	0	0	0	0	161	96	92	25	98	36.3					0	0	5.9	0	0	0	0	0	0
341	Male	71	2	1	2020-06-10	1899-12-31 19:10:00	2020-06-10	1899-12-31 19:34:00	2020-06-16	6	1	Grain in ear	Large Artery Atherosclerosis Type	1	0	2023-01-03	1	1	1	0	0	0	0	0	0	0	0	0	0	0	148	98	67	16	98	36.2	6	3	1		0	0	6.8	1	0	0	0	0	0
342	Female	89	1	1	2020-06-11	1899-12-31 20:10:00	2020-06-11	1899-12-31 21:05:00	2020-06-17	6	2	Grain in ear	Large Artery Atherosclerosis Type	1	0	2020-06-16	2	0	0	1	0	0	0	0	0	0	0	1	0	0	118	109	118	20	99	36.7	8	4	1		0	0	6.4	1	0	0	0	0	1
343	Male	56	2	1	2020-06-12	1899-12-31 07:00:00	2020-06-12	1899-12-31 07:52:00	2020-06-21	9	2	Grain in ear	Intracerebral Hemorrhage	2	0	2020-06-20	2	0	0	0	0	0	0	0	0	0	0	0	0	0	144	83	89	20	98	36.7					0	0	8	0	0	0	0	0	0
344	Female	46	2	1	2020-06-16	1899-12-31 18:00:00	2020-06-16	1899-12-31 19:38:00	2020-07-03	17	1	Grain in ear	Intracerebral Hemorrhage	2	0	2023-03-15	1	1	0	0	0	0	0	0	0	0	0	0	0	0	163	111	76	20	100	36.7					0	0	6.2	0	0	0	0	0	0
345	Male	65	2	1	2020-06-18	1899-12-31 11:00:00	2020-06-18	1899-12-31 21:49:00	2020-06-27	9	1	Grain in ear	Lacunar Infarction due to Atherosclerosis	1	0	2020-06-28	1	1	0	0	0	0	0	0	0	0	0	0	0	0	167	101	73	19	97	36.6	6	3	3	2	0	0	7.7	1	0	1	1	0	0
346	Male	75	1	1	2020-06-17	1899-12-31 22:00:00	2020-06-18	1899-12-31 10:08:00	2020-07-07	19	1	Grain in ear	Large Artery Atherosclerosis Type	1	0	2020-07-07	1	1	1	0	1	1	0	0	0	0	0	0	0	0	129	93	106	20	98	36.8	16	5	5	5	0	0	7.4	0	1	0	0	1	0
347	Female	79	1	1	2020-06-19	1899-12-31 17:00:00	2020-06-19	1899-12-31 17:50:00	2020-06-27	8	1	Grain in ear	Large Artery Atherosclerosis Type	1	0	2020-07-31	1	1	0	1	0	0	0	0	0	0	0	0	0	0	144	74	59	21	97	36.1	22	5	4	5	0	0	5.5	1	0	1	0	0	0
348	Male	53	1	1	2020-06-19	1899-12-31 10:00:00	2020-06-19	1899-12-31 22:00:00	2020-06-22	3	1	Grain in ear	Large Artery Atherosclerosis Type	1	0	2020-06-22	1	1	1	0	0	0	0	0	0	0	0	0	0	0	201	99	93	23	100	36.8	19	5	3	3	0	0	18	1	1	0	0	0	1
349	Male	74	1	1	2020-06-21	1899-12-31 15:50:00	2020-06-21	1899-12-31 16:31:00	2020-06-30	9	1	Summer Solstice	Small Artery Occlusion Type	1	0	2022-05-29	2	1	1	0	0	1	0	0	0	0	0	0	0	0	137	82	100	24	100	36.5	13	4	4	6	0	0	9.9	1	0	0	0	0	0
350	Female	81	2	1	2020-06-21	1899-12-31 08:30:00	2020-06-21	1899-12-31 09:45:00	2020-07-07	16	2	Summer Solstice	Acute cerebral infarction	1	0	2020-07-03	2	1	1	0	0	0	0	0	0	0	1	0	0	0	113	53	70	20	100	36.3	16				0	0	9
351	Female	74	1	1	2020-06-22	1899-12-31 16:50:00	2020-06-22	1899-12-31 18:30:00	2020-06-30	8	1	Summer Solstice	TIA	3	0	2021-04-29	1	1	0	0	0	1	0	0	0	0	0	0	0	0	164	84	66	22	98	36.6	2	1	1	3	0	0	6.3	1	0	1	0	1	0
352	Female	64	1	1	2020-06-23	1899-12-31 16:50:00	2020-06-23	1899-12-31 18:19:00	2020-06-24	1	1	Summer Solstice	Lacunar Infarction due to Atherosclerosis	1	0	2020-06-24	1	1	0	0	0	1	0	0	0	0	1	0	0	0	121	68	100	30	98	40.2	5	2	1	2	0	0	9.2	1	0	0	0	0	0
353	Male	59	2	1	2020-06-25	1899-12-31 03:00:00	2020-06-25	1899-12-31 12:00:00	2020-07-06	11	1	Summer Solstice	Large Artery Atherosclerosis Type	1	0	2020-07-06	1	1	0	0	0	0	0	0	0	0	0	0	0	0	151	86	97	19	98	36.7	3	0	1	2	0	0	7.1	1	0	1	0	0	0
354	Female	77	1	2	2020-06-25	1899-12-31 20:00:00	2020-06-26	1899-12-31 17:45:00	2020-07-05	9	1	Summer Solstice	Small Artery Occlusion Type	1	0	2023-01-04	1	0	0	0	0	1	0	0	0	0	0	1	0	0	178	85	73	17	100	36.4	3	4	1	4	0	0	7.5	0	0	1	0	0	0
355	Male	69	2	1	2020-06-26	1899-12-31 22:45:00	2020-06-26	1899-12-31 23:24:00	2020-09-15	81	1	Summer Solstice	Large Artery Atherosclerosis Type	1	0	2022-06-05	1	1	1	1	0	0	0	0	0	0	0	0	0	0	135	81	92	19	99	36.2	12	4	1	6	0	0	9	0	0	0	0	0	0
356	Female	83	1	1	2020-06-26	1899-12-31 20:00:00	2020-06-27	1899-12-31 00:13:00	2020-07-02	5	1	Summer Solstice	Large Artery Atherosclerosis Type	1	0	2023-01-03	1	1	0	1	1	0	0	0	0	0	0	0	0	0	147	89	74	19	97	36.1	2	4	1	6	0	0	6.1	0	0	0	0	0	0
357	Male	59	1	1	2020-06-27	1899-12-31 01:00:00	2020-06-27	1899-12-31 01:53:00	2020-07-03	6	1	Summer Solstice	Small Artery Occlusion Type	1	0	2020-07-03	1	0	0	0	0	0	0	0	0	0	0	1	1	1	153	92	65	20	98	36.2	2	3	1	1	0	0	6.3	0	0	0	0	1	0
358	Female	73	2	1	2020-06-28	1899-12-31 20:30:00	2020-06-28	1899-12-31 22:35:00	2020-07-20	22	1	Summer Solstice	Cerebral Infarction	1	0	2023-03-23	1	0	0	0	0	0	0	0	0	0	0	0	0	0	162	87	84	17	100	36.2					0	0	6.6	0	0	0	0	1	0
359	Female	80	1	1	2020-06-29	1899-12-31 09:40:00	2020-06-29	1899-12-31 10:12:00	2020-07-07	8	1	Summer Solstice	Large Artery Atherosclerosis Type	1	0	2023-04-06	1	1	1	0	0	0	0	0	0	0	0	0	0	0	163	73	69	23	100	36.5	15	4	2	6	0	0	10.5	1	0	0	0	0	0
360	Male	82	1	1	2020-07-02	1899-12-31 21:00:00	2020-07-02	1899-12-31 22:13:00	2020-07-14	12	1	Summer Solstice	Intracerebral Hemorrhage	2	14	2020-07-14	1	1	0	0	0	0	0	0	0	0	0	0	0	0	174	89	80	20	98	36.7					0	0	6.7	0	0	0	0	0	0
361	Female	84	1	1	2020-07-03	1899-12-31 18:00:00	2020-07-04	1899-12-31 03:00:00	2020-07-05	1	1	Summer Solstice	Large Artery Atherosclerosis Type	1	0	2020-07-05	1	0	0	0	0	0	0	0	0	0	0	0	0	0	136	73	53	20	100	36.2	17	4		2	0	0	6.2	1	1	1	0	0	0
362	Male	64	1	1	2020-07-05	1899-12-31 19:00:00	2020-07-05	1899-12-31 21:20:00	2020-07-12	7	1	Summer Solstice	Large Artery Atherosclerosis Type	1	0	2022-11-26	1	0	0	0	0	0	0	0	0	0	0	0	1	0	159	95	102	20	98	36.4	3	4	1		0	0	11.2	1	0	0	0	0	1
363	Male	56	2	1	2020-07-06	1899-12-31 08:00:00	2020-07-06	1899-12-31 15:20:00	2020-07-14	8	1	Minor heat	Small Artery Occlusion Type	1	0	2020-10-07	1	1	0	0	0	0	0	0	0	0	0	0	0	0	180	120	87	19	98	36.7	5	4	1	2	0	0	5.7	0	0	1	0	0	0
364	Male	84	1	1	2020-07-07	1899-12-31 23:30:00	2020-07-08	1899-12-31 02:43:00	2020-07-20	12	1	Minor heat	Large Artery Atherosclerosis Type	1	0	2021-07-19	1	1	0	1	0	0	0	0	0	0	0	0	0	0	170	82	62	18	98	36.3	7	4	1	5	0	0	6.4	1	0	0	0	1	0
365	Female	84	1	1	2020-07-10	1899-12-31 14:30:00	2020-07-10	1899-12-31 17:07:00	2020-07-11	1	1	Minor heat	Large Artery Atherosclerosis Type	1	0	2020-07-11	1	1	0	0	0	0	0	0	0	0	0	0	0	0	203	117	80	15	98	36.5	18	5	4	3	0	0	7.8	1	1	0	0	0	0
366	Male	61	1	1	2020-07-10	1899-12-31 22:30:00	2020-07-11	1899-12-31 08:50:00	2020-07-17	6	1	Minor heat	Lacunar Infarction due to Atherosclerosis	1	0	2020-07-22	1	0	0	0	0	0	0	0	0	0	0	0	1	1	159	91	94	21	98	36.2	2	3	1	2	0	0	6.3	1	0	0	0	0	0
367	Male	59	1	1	2020-07-13	1899-12-31 07:00:00	2020-07-13	1899-12-31 11:35:00	2020-07-20	7	1	Minor heat	Large Artery Atherosclerosis Type	1	0	2022-10-07	1	0	1	0	0	0	0	0	0	0	0	0	0	0	208	116	91	20	100	36.5	1	0	1	3	0	0	20.2	1	0	1	0	1	0
368	Female	92	1	1	2020-07-13	1899-12-31 13:00:00	2020-07-13	1899-12-31 17:55:00	2020-08-12	30	1	Minor heat	Cerebral Infarction	1	0	2020-08-12	1	1	0	0	0	1	1	0	0	0	0	0	0	0	167	85	67	21	100	36.9					0	0	4.8	1	0	1	0	0	0
369	Male	89	1	1	2020-07-13	1899-12-31 22:00:00	2020-07-13	1899-12-31 22:35:00	2020-07-21	8	1	Minor heat	Large Artery Atherosclerosis Type	1	0	2022-01-24	2	0	0	0	0	1	0	0	0	0	0	0	0	0	128	67	100	16	100	36.7	8	3	3	4	0	0	8.9	1	0	1	0	0	0
370	Male	73	1	1	2020-07-14	1899-12-31 17:00:00	2020-07-14	1899-12-31 18:57:00	2020-07-22	8	1	Minor heat	Large Artery Atherosclerosis Type	1	0	2021-04-17	2	1	0	0	0	1	1	0	0	0	0	1	0	0	119	68	121	20	97	37.5	17	3	2	3	0	0	13.6	1	0	0	0	0	0
371	Female	76	1	1	2020-07-15	1899-12-31 17:00:00	2020-07-16	1899-12-31 12:54:00	2020-07-24	8	1	Minor heat	Cardioembolic Type	1	0	2020-07-24	1	0	0	0	1	0	0	0	0	0	0	0	0	0	147	98	125	22	98	36.5	9	4	1	5	0	0	6.5	0	0	0	0	0	0
372	Male	82	1	1	2020-07-15	1899-12-31 20:20:00	2020-07-16	1899-12-31 03:55:00	2020-07-21	5	1	Minor heat	Large Artery Atherosclerosis Type	1	0	2020-07-21	1	1	0	0	0	0	0	0	0	0	0	0	0	0	150	90	85	19	95	36.8	12	4	2	4	0	0	9	0	1	0	0	0	0
373	Male	79	1	1	2020-07-17	1899-12-31 12:00:00	2020-07-17	1899-12-31 18:42:00	2020-07-24	7	1	Minor heat	Large Artery Atherosclerosis Type	1	0	2020-07-24	1	1	0	0	0	0	0	0	0	0	1	0	0	0	165	77	80	20	97	36.3	4	4	1	4	0	0	6.2	1	1	1	0	0	0
374	Male	89	2	1	2020-07-17	1899-12-31 18:00:00	2020-07-18	1899-12-31 10:37:00	2020-08-03	16	1	Minor heat	Intracerebral Hemorrhage	2	0	2020-08-03	1	0	0	0	0	0	0	0	0	0	0	0	0	0	175	97	67	20	100	36.5	9	4	4	3	0	0	6.6	0	0	0	0	0	0
375	Male	84	1	1	2020-07-18	1899-12-31 19:00:00	2020-07-19	1899-12-31 09:56:00	2020-08-20	32	1	Minor heat	Large Artery Atherosclerosis Type	1	0	2020-08-20	1	1	0	0	0	0	0	0	0	0	0	1	0	0	133	76	125	17	96	36.6	24	5	5	3	0	0	7.9	1	1	0	0	0	1
376	Male	58	1	1	2020-07-19	1899-12-31 20:00:00	2020-07-19	1899-12-31 22:40:00	2020-08-07	19	1	Minor heat	Large Artery Atherosclerosis Type	1	0	2021-10-19	1	1	1	0	0	0	0	0	0	0	0	0	0	0	137	92	78	18	98	36.2	12	0	1	3	0	0	15	1	0	0	0	0	0
377	Female	80	1	2	2020-07-20	1899-12-31 19:00:00	2020-07-20	1899-12-31 20:50:00	2020-07-30	10	1	Minor heat	Large Artery Atherosclerosis Type	1	0	2023-02-28	1	1	0	0	0	1	0	0	0	0	0	0	0	0	157	92	71	20	98	36.4	3	3	1	4	0	0	6.8	1	0	0	0	1	0
378	Male	74	1	1	2020-07-20	1899-12-31 12:00:00	2020-07-20	1899-12-31 22:39:00	2020-08-02	13	1	Minor heat	Large Artery Atherosclerosis Type	1	0	2021-03-21	1	1	0	0	0	0	0	0	0	0	0	0	0	0	174	78	65	20	98	36.5	1	2	1	3	0	0	6.5	1	0	1	0	1	0
379	Male	73	1	1	2020-07-21	1899-12-31 15:00:00	2020-07-21	1899-12-31 16:42:00	2020-07-27	6	1	Minor heat	Large Artery Atherosclerosis Type	1	0	2020-07-27	1	0	0	0	0	0	0	0	0	0	0	0	0	0	150	105	78	20		36.5	23	5	5		0	0	5.8	0	0	0	0	0	0
380	Male	56	1	1	2020-07-21	1899-12-31 12:00:00	2020-07-21	1899-12-31 22:38:00	2020-07-27	6	1	Minor heat	Large Artery Atherosclerosis Type	1	0	2020-07-27	1	0	1	0	0	0	0	0	0	0	0	0	0	0	144	95	90	18	98	36.4	5	3	1	1	0	0	7.9	1	0	0	0	1	0
381	Female	83	1	2	2020-07-24	1899-12-31 09:00:00	2020-07-24	1899-12-31 11:15:00	2020-08-06	13	1	Great Heat	Cardioembolic Type	1	0	2022-06-24	2	1	0	1	1	1	0	0	0	0	0	1	0	0	167	89	73	19	98	36.5	19	5	5	4	0	0	5	0	1	1	0	0	1
382	Female	60	2	2	2020-07-25	1899-12-31 08:15:00	2020-07-25	1899-12-31 09:09:00	2020-08-04	10	1	Great Heat	Cerebral Infarction	3	0	2020-08-05	1	1	0	1	0	1	0	0	0	0	0	1	0	0	165	73	71	18	99	36.7				2	0	0	6.5	1	0	1	0	0	0
383	Male	70	1	1	2020-07-27	1899-12-31 14:50:00	2020-07-27	1899-12-31 15:20:00	2020-08-21	25	2	Great Heat	Intracerebral Hemorrhage	2	63	2020-08-20	2	1	1	0	0	0	0	0	0	0	0	0	0	0	145	84	64	20	99	36.5					0	0	16.4	0	0	1	0	0	0
384	Male	37	1	2	2020-07-27	1899-12-31 23:00:00	2020-07-27	1899-12-31 09:03:00	2020-08-03	7	1	Great Heat	Large Artery Atherosclerosis Type	1	0	2021-10-17	1	1	0	0	0	1	0	0	0	0	0	0	1	0	136	100	67	20		36.6	3	2	1	3	0	0	6.4	1	0	1	0	0	0
385	Male	79	1	1	2020-07-30	1899-12-31 14:00:00	2020-07-30	1899-12-31 22:15:00	2020-08-07	8	1	Great Heat	Large Artery Atherosclerosis Type	1	0	2020-08-07	1	0	0	0	0	0	0	0	0	0	0	0	0	0	167	88	63	16	99	36.6	12	4	1		0	0	9.4	0	1	0	0	0	0
386	Male	79	2	1	2020-07-31	1899-12-31 07:30:00	2020-07-31	1899-12-31 09:36:00	2020-08-10	10	1	Great Heat	Large Artery Atherosclerosis Type	1	0	2020-08-10	1	1	0	0	0	1	0	0	0	0	0	0	0	0	207	112	112	28	99	36.6	7	4	3	5	0	0	5	1	0	1	0	1	1
387	Male	78	1	1	2020-07-31	1899-12-31 11:20:00	2020-07-31	1899-12-31 16:22:00	2020-08-05	5	1	Great Heat	Large Artery Atherosclerosis Type	1	0	2022-11-16	1	1	0	0	0	0	0	0	0	0	0	1	0	0	136	78	70	20	98	36.8	6	4	1		0	0	8.5	1	0	0	0	0	0
388	Female	65	1	1	2020-07-31	1899-12-31 13:00:00	2020-07-31	1899-12-31 21:42:00	2020-08-05	5	1	Great Heat	Large Artery Atherosclerosis Type	1	0	2020-08-05	1	0	1	0	0	0	0	0	0	0	0	0	0	0	118	86	60	19	98	36.5	0	0	1	2	0	0	18.5	0	0	1	0	0	1
389	Male	86	2	1	2020-08-01	1899-12-31 10:30:00	2020-08-01	1899-12-31 14:00:00	2020-08-04	3	1	Great Heat	Stroke	1	0	2020-08-04	1	1	0	0	0	0	0	0	0	0	0	0	0	0	126	69	77	20	100	36.6	2	1	1	3	0	0	5.8	1	0	0	0	0	0
390	Female	88	1	1	2020-08-02	1899-12-31 17:50:00	2020-08-02	1899-12-31 18:53:00	2020-08-18	16	1	Great Heat	Large Artery Atherosclerosis Type	3	0	2021-03-09	2	1	0	0	0	0	0	0	0	0	0	1	0	0	171	80	88	20	96	36	3			2	0	0	7.5	0	0	1	0	0	0
391	Female	53	2	1	2020-08-03	1899-12-31 04:00:00	2020-08-03	1899-12-31 08:08:00	2020-09-07	35	1	Great Heat	Intracerebral Hemorrhage	2	0	2021-11-01	1	1	0	0	0	0	0	0	0	0	0	0	0	0	196	110	103	20	98	36.6					0	0	9.2	0	0	0	0	0	0
392	Male	80	1	1	2020-08-05	1899-12-31 07:30:00	2020-08-05	1899-12-31 09:18:00	2020-08-13	8	1	Great Heat	Large Artery Atherosclerosis Type	1	0	2020-11-08	1	0	0	0	0	1	0	0	0	0	0	0	0	0	169	91	89	20	98	36.6	6	4	2	3	0	0	7.8	1	0	1	1	0	0
393	Male	76	1	1	2020-08-05	1899-12-31 11:30:00	2020-08-05	1899-12-31 12:40:00	2020-08-10	5	1	Great Heat	Large Artery Atherosclerosis Type	1	0	2023-01-06	1	0	0	0	0	0	0	0	0	0	0	0	0	0	138	80	101	26	99	36.6	12	4	2	2	0	0	7	0	0	1	1	0	1
394	Male	66	1	1	2020-08-07	1899-12-31 08:00:00	2020-08-07	1899-12-31 09:24:00	2020-08-14	7	1	Start of autumn	Large Artery Atherosclerosis Type	1	0	2023-02-22	1	1	0	0	0	0	0	0	1	0	0	1	1	0	160	89	80	20	100	36.8	9	5	1	3	0	0	6.2	0	0	1	0	0	0
395	Female	80	1	1	2020-08-09	1899-12-31 07:30:00	2020-08-09	1899-12-31 09:03:00	2020-09-07	29	1	Start of autumn	Large Artery Atherosclerosis Type	1	0	2021-11-12	2	1	0	1	0	1	0	0	0	0	0	0	0	0	156	104	134	19	98	36.5	6	4	1	5	0	0	9.1	1	0	0	0	0	0
396	Female	70	1	1	2020-08-09	1899-12-31 08:30:00	2020-08-09	1899-12-31 09:10:00	2020-08-17	8	1	Start of autumn	Large Artery Atherosclerosis Type	1	0	2022-12-07	1	1	0	0	0	0	1	0	0	0	0	0	0	0	135	75	99	20	99	36.7	6	3	1	3	0	0	12	0	0	0	0	0	0
397	Male	66	1	1	2020-08-08	1899-12-31 20:00:00	2020-08-09	1899-12-31 21:23:00	2020-10-10	62	1	Start of autumn	Cerebral Infarction	1	0	2023-03-20	1	0	0	0	0	0	0	0	0	0	0	0	0	0	251	113	77	18	100	37.1					0	0	9.6	0	0	1	0	0	0
398	Male	62	2	1	2020-08-10	1899-12-31 12:00:00	2020-08-10	1899-12-31 13:30:00	2020-08-16	6	1	Start of autumn	Large Artery Atherosclerosis Type	1	0	2023-04-06	1	1	0	0	0	0	0	0	0	0	0	0	1	0	191	92	80	20	98	36.4	22	5	2		0	0	6.9	1	1	0	0	0	0
399	Male	76	2	1	2020-08-16	1899-12-31	2020-08-16	1899-12-31 08:17:00	2020-08-22	6	1	Start of autumn	Cardioembolic Type	1	0	2023-02-13	1	0	0	0	1	0	0	0	0	0	0	1	1	1	132	75	82	20	99	36.2	13	5	3	3	0	0	5.2	1	1	0	0	0	0
400	Female	81	1	1	2020-08-16	1899-12-31 09:00:00	2020-08-16	1899-12-31 14:28:00	2020-08-18	2	2	Start of autumn	Large Artery Atherosclerosis Type	1	0	2020-08-17	2	1	0	1	0	0	0	0	0	0	0	0	0	0	219	89	60	34	99	36.5	25	5	5	3	0	0	6.1	1	1	1	1	0	0
401	Male	76	1	1	2020-08-19	1899-12-31 12:40:00	2020-08-19	1899-12-31 13:20:00	2020-08-29	10	1	Start of autumn	Cerebral Infarction	1	0	2022-12-28	1	1	1	0	0	1	0	0	0	0	0	0	0	0	181	76	81	20	98	36.7	1	1	1	6	0	0	9.3	1	1	0	0	1	0
402	Male	83	1	1	2020-08-21	1899-12-31 19:00:00	2020-08-21	1899-12-31 19:55:00	2020-08-28	7	1	Start of autumn	TIA	3	0	2021-01-25	1	1	0	0	0	1	0	0	0	0	1	0	0	0	146	71	87	13	98	36.6	8	4	1	4	0	0	7.2	1	0	0	0	1	0
403	Male	41	1	1	2020-08-21	1899-12-31 08:00:00	2020-08-21	1899-12-31 14:54:00	2020-10-28	68	1	Start of autumn	Large Artery Atherosclerosis Type	1	0	2020-10-28	1	0	0	0	0	0	0	0	0	0	0	1	0	0	141	87	65	20	99	36.9	13	4	5		0	0	5.2	1	1	0	0	0	1
404	Female	83	1	1	2020-08-22	1899-12-31 16:00:00	2020-08-22	1899-12-31 16:16:00	2020-09-01	10	1	End of Hea	Large Artery Atherosclerosis Type	1	0	2020-10-26	1	1	0	1	0	1	0	0	0	0	0	1	0	0	181	78	76	20	98	36.4	7	4	3	4	0	0	6.8	1	0	1	0	1	0
405	Female	57	2	1	2020-08-23	1899-12-31 10:30:00	2020-08-23	1899-12-31 12:55:00	2020-09-21	29	1	End of Hea	Intracerebral Hemorrhage	2	17	2020-11-20	1	0	0	0	0	0	0	0	0	0	0	1	0	0	149	90	78	22	100	36.8	21	4			0	0	8.2	0	0	0	0	0	0
406	Female	64	2	1	2020-08-26	1899-12-31 09:00:00	2020-08-26	1899-12-31 11:00:00	2020-08-27	1	1	End of Hea	Cardioembolic Type	1	0	2020-08-26	1	0	0	0	1	1	1	0	0	0	0	1	0	0	126	77	82	18	99	36	29				0	0	4.9	0	0	1	0	0	0
407	Male	80	1	1	2020-08-26	1899-12-31 17:00:00	2020-08-27	1899-12-31 05:37:00	2020-08-30	3	1	End of Hea	Large Artery Atherosclerosis Type	1	0	2020-08-30	1	1	0	0	0	0	0	0	0	0	0	1	1	0	143	79	68	20	99	36.3	6	4	1		0	0	5.1	1	0	1	1	0	1
408	Male	50	2	1	2020-08-27	1899-12-31 21:16:00	2020-08-28	1899-12-31 01:09:00	2020-09-08	11	1	End of Hea	Acute cerebral infarction	1	0	2021-03-23	1	0	0	0	0	0	0	0	0	0	0	1	1	0	203	113	73	20	98	37.1	1	1	1	2	0	0	6.8	1	0	0	0	1	0
409	Male	72	1	1	2020-08-27	1899-12-31 20:00:00	2020-08-28	1899-12-31 08:14:00	2020-09-07	10	1	End of Hea	Large Artery Atherosclerosis Type	1	0	2020-09-07	1	0	0	0	0	0	0	0	0	0	1	0	0	0	164	83	61	18	99	36.9	4	3	1	1	0	0	6.4	1	0	0	0	0	0
410	Male	47	2	1	2020-08-30	1899-12-31 22:25:00	2020-08-30	1899-12-31 23:12:00	2020-09-13	14	1	End of Hea	Intracerebral Hemorrhage	2	6.2	2020-10-16	1	0	0	0	0	0	0	0	0	0	0	0	0	0	160	110	80	16	96	36.1	6	4	2		0	0	7.2	0	0	0	0	0	0
411	Female	88	1	1	2020-08-30	1899-12-31 16:00:00	2020-09-01	1899-12-31 08:35:00	2020-09-08	7	1	End of Hea	Acute cerebral infarction	1	0	2020-09-08	1	1	0	0	0	0	0	0	0	0	0	0	0	0	106	57	145	23	98	40.8	31	5	2	3	0	0	10.8	0	0	1	0	0	0
412	Male	79	1	2	2020-09-01	1899-12-31 21:00:00	2020-09-02	1899-12-31 14:29:00	2020-09-28	26	1	End of Hea	Large Artery Atherosclerosis Type	1	0	2020-09-28	1	1	1	0	0	1	0	0	0	0	0	1	0	0	123	71	109	24	98	36.6	14	5	3	5	0	0	23.9	1	0	1	0	0	0
413	Female	67	1	1	2020-09-04	1899-12-31 20:00:00	2020-09-04	1899-12-31 22:55:00	2020-09-11	7	1	End of Hea	Large Artery Atherosclerosis Type	1	0	2022-11-28	1	0	1	1	0	1	0	0	0	0	0	1	0	0	148	83	80	18	99	36.5	1	2	1	3	0	0	8.4	1	0	0	0	1	0
414	Male	51	2	1	2020-09-06	1899-12-31 16:50:00	2020-09-06	1899-12-31 18:21:00	2020-09-06	0	1	End of Hea	Intracerebral Hemorrhage	2	16	2020-09-06	1	0	1	0	0	0	0	0	0	0	0	1	0	0	108	77	61	20	97	36.1	8				0	0	16.2	0	0	0	0	0	0
415	Female	90	2	1	2020-09-06	1899-12-31 15:40:00	2020-09-06	1899-12-31 16:40:00	2020-10-05	29	1	End of Hea	Large Artery Atherosclerosis Type	1	0	2020-10-15	1	1	1	1	1	0	0	0	0	0	0	0	0	0	218	102	87	18	98	36.8	15	4	4	4	0	0	7.5	1	0	0	0	1	0
416	Male	63	2	1	2020-09-13	1899-12-31 12:40:00	2020-09-13	1899-12-31 13:48:00	2020-09-18	5	1	White dew	TIA	3	0	2023-03-23	1	1	0	1	0	1	0	0	0	0	0	0	0	0	209	123	71	17	99	36.1	1	1	1	5	0	0	8.4	0	0	1	0	1	0
417	Female	76	1	1	2020-09-14	1899-12-31 13:00:00	2020-09-14	1899-12-31 17:05:00	2020-09-15	1	1	White dew	Large Artery Atherosclerosis Type	1	0	2020-09-15	1	1	0	0	0	0	0	0	0	0	0	0	0	0	185	80	88	22	98	36.8	27	5		3	0	0	6.8	0	0	0	0	0	0
418	Male	84	1	1	2020-09-17	1899-12-31 09:40:00	2020-09-17	1899-12-31 10:40:00	2020-09-25	8	1	White dew	TIA	3	0	2021-01-25	1	1	0	1	0	1	0	0	0	0	0	0	0	0	149	86	130	22	100	36.5	12			5	0	0	5.4	1	0	0	0	0	0
419	Female	80	1	2	2020-09-19	1899-12-31 14:00:00	2020-09-19	1899-12-31 16:00:00	2020-09-24	5	1	White dew	TIA	3	0	2021-11-12	2	1	0	1	1	1	0	0	0	0	0	0	0	0	157	91	121	16	99	36.5	6	3	1	5	0	0	7.3	1	0	0	0	0	0
420	Male	54	1	1	2020-09-21	1899-12-31 13:03:00	2020-09-21	1899-12-31 14:03:00	2020-09-27	6	1	White dew	Large Artery Atherosclerosis Type	1	0	2020-09-27	1	1	1	0	0	1	0	0	0	0	0	0	0	0	147	89	103	20	99	36.2	0	1	1	4	0	0	12	1	0	1	0	1	0
421	Male	70	1	1	2020-09-20	1899-12-31 15:00:00	2020-09-21	1899-12-31 07:00:00	2020-09-29	8	1	White dew	Large Artery Atherosclerosis Type	1	0	2021-08-18	1	0	0	1	0	0	0	0	0	0	0	0	0	0	120	80	80	20	98	36.7	9	4	2	4	0	0	5.5	1	0	0	0	1	0
422	Male	75	1	1	2020-09-21	1899-12-31 14:00:00	2020-09-21	1899-12-31 17:07:00	2020-10-09	18	1	Autumn equinox	Large Artery Atherosclerosis Type	1	0	2021-04-26	2	1	0	0	0	0	0	0	0	0	1	0	1	1	160	98	75	18	99	36	6	4	3	3	0	0	4.9	1	0	1	0	1	0
423	Male	64	1	1	2020-09-22	1899-12-31 18:00:00	2020-09-23	1899-12-31 02:03:00	2020-09-24	1	1	Start of autumn	Large Artery Atherosclerosis Type	1	0	2020-09-24	1	1	1	0	0	1	0	0	0	0	0	0	1	1	100	62	95	20	98	36.7	4	3	1	5	0	0	7.8	1	0	0	0	1	0
424	Male	47	2	1	2020-09-23	1899-12-31 18:00:00	2020-09-23	1899-12-31 18:40:00	2020-12-24	92	1	Autumn equinox	Intracerebral Hemorrhage	2	0	2021-09-06	1	1	0	0	0	0	0	0	0	0	0	0	0	0	178	106	80	18	99	36	41	5			0	0	7.4	0	0	0	0	0	0
425	Male	68	1	2	2020-09-23	1899-12-31 23:00:00	2020-09-24	1899-12-31 08:25:00	2020-09-29	5	1	Autumn equinox	Large Artery Atherosclerosis Type	1	0	2020-10-06	1	0	0	0	0	1	0	0	0	0	0	0	0	0	150	85	75	18	98	36.4	2	3	1	2	0	0	7.3	1	0	0	0	0	0
426	Female	64	2	1	2020-09-24	1899-12-31 11:50:00	2020-09-24	1899-12-31 12:32:00	2020-09-30	6	1	Autumn equinox	Large Artery Atherosclerosis Type	1	0	2020-12-25	1	1	1	0	0	0	0	0	0	0	0	0	0	0	200	102	79	24	99	36.6	11	4	1	2	0	0	9.7	1	0	0	0	0	0
427	Male	51	1	1	2020-09-24	1899-12-31 17:30:00	2020-09-24	1899-12-31 22:53:00	2020-09-29	5	1	Autumn equinox	Small Artery Occlusion Type	1	0	2023-04-05	2	1	0	0	0	0	0	0	0	0	0	0	0	0	170	112	78	19	98	36.6	1	2	1	2	0	0	8.9	0	0	1	0	0	0
428	Female	88	1	1	2020-09-25	1899-12-31 18:45:00	2020-09-25	1899-12-31 19:25:00	2020-10-01	6	1	Autumn equinox	Large Artery Atherosclerosis Type	1	0	2021-03-10	1	1	0	1	1	1	0	0	0	0	0	0	0	0	180	108	100	25	99	36.3	2	3	1	5	0	0	8.8	1	1	1	0	0	0
429	Female	88	1	1	2020-09-27	1899-12-31 10:07:00	2020-09-27	1899-12-31 10:48:00	2020-10-03	6	1	Autumn equinox	Large Artery Atherosclerosis Type	1	0	2022-07-18	2	1	0	0	0	0	0	0	0	0	0	0	0	0	184	112	75	25	99	36.6	13	5	2	3	0	0	7	1	0	0	0	0	0
430	Male	74	1	1	2020-09-28	1899-12-31 02:00:00	2020-09-28	1899-12-31 08:32:00	2020-10-12	14	1	Autumn equinox	Large Artery Atherosclerosis Type	1	0	2023-04-13	1	1	1	0	0	1	0	0	0	0	0	0	1	1	201	102	83	18	99	36.3	2	4	1	5	0	0	6.8	1	0	1	0	1	0
431	Male	60	2	1	2020-09-29	1899-12-31 10:40:00	2020-09-29	1899-12-31 11:20:00	2020-10-09	10	1	Autumn equinox	Large Artery Atherosclerosis Type	1	0	2020-10-09	1	0	0	0	0	1	0	0	0	0	0	0	1	1	142	104	101	20	100	36.2	3	1	1	2	0	0	6.7	1	0	1	0	0	0
432	Male	86	1	1	2020-09-28	1899-12-31 20:00:00	2020-09-29	1899-12-31 00:31:00	2020-10-04	5	1	Autumn equinox	Large Artery Atherosclerosis Type	1	0	2020-10-04	1	0	0	1	0	0	0	0	0	0	0	0	0	0	113	67	139	15	96	36	16	5	2	4	0	0	6.1	1	0	1	1	0	0
433	Female	77	2	1	2020-09-30	1899-12-31 19:30:00	2020-09-30	1899-12-31 23:34:00	2020-10-10	10	1	Autumn equinox	Large Artery Atherosclerosis Type	1	0	2023-04-08	1	1	1	1	1	1	0	0	0	0	1	0	0	0	145	102	85	20	99	36.5	5	4	1	5	0	0	8.3	1	1	0	0	0	0
434	Male	68	1	1	2020-10-02	1899-12-31 13:06:00	2020-10-02	1899-12-31 13:36:00	2020-10-11	9	1	Autumn equinox	TIA	3	0	2023-04-15	1	0	0	0	0	0	0	0	0	0	0	0	1	0	133	69	58	20	100	36.2	0	1	1		0	0	8.6	1	0	0	0	1	0
435	Male	82	2	1	2020-10-05	1899-12-31 17:40:00	2020-10-06	1899-12-31 19:09:00	2020-10-12	6	1	Autumn equinox	Large Artery Atherosclerosis Type	1	0	2023-04-11	1	1	0	0	0	1	0	0	1	0	0	0	0	0	200	89	80	20	100	36.3	4	3	1	2	0	0	6.3	1	0	0	0	0	0
436	Female	71	1	1	2020-10-06	1899-12-31 09:30:00	2020-10-06	1899-12-31 22:24:00	2020-10-14	8	1	Autumn equinox	Large Artery Atherosclerosis Type	1	0	2022-12-14	1	1	0	0	0	0	0	0	0	0	0	0	0	0	206	90	76	19	96	37	9	3	1	2	0	0	4.4	1	1	1	0	0	0
437	Male	67	2	1	2020-10-06	1899-12-31 22:00:00	2020-10-07	1899-12-31 07:51:00	2020-10-21	14	1	Autumn equinox	Acute cerebral infarction	1	0	2021-03-19	1	1	0	0	0	0	0	0	0	0	0	0	0	0	156	69	75	16	96	36.8	3	2	1	2	0	0	8.3	1	0	1	0	1	0
438	Male	75	1	1	2020-10-07	1899-12-31 21:33:00	2020-10-07	1899-12-31 21:55:00	2020-10-14	7	1	Autumn equinox	TIA	3	0	2022-03-22	1	1	0	0	0	0	0	0	0	0	0	0	0	0	221	75	78	20	100	36.5	0	0	1	3	0	0	6.4	1	0	0	1	1	0
439	Male	52	2	1	2020-10-09	1899-12-31	2020-10-09	1899-12-31 07:00:00	2020-10-26	17	1	Cold dew	Large Artery Atherosclerosis Type	1	0	2021-10-07	1	1	0	0	0	0	0	0	0	0	0	0	0	0	174	104	68	18	100	36.5	6	4	1	1	0	0	5.5	0	0	0	1	0	0
440	Male	65	1	1	2020-10-09	1899-12-31 04:00:00	2020-10-09	1899-12-31 15:40:00	2020-10-15	6	1	Cold dew	Large Artery Atherosclerosis Type	1	0	2020-10-15	1	1	0	0	0	0	0	0	0	0	0	0	0	0	166	106	124	24	98	37.5	32	5		2	0	0	8.1	1	0	0	0	0	0
441	Male	58	1	1	2020-10-12	1899-12-31 00:30:00	2020-10-12	1899-12-31 09:37:00	2020-10-18	6	1	Cold dew	Large Artery Atherosclerosis Type	1	0	2020-10-19	1	1	1	0	0	0	0	0	0	0	0	0	1	1	146	88	80	22	98	36.3	7	4	2	3	0	0	10.3	1	0	0	0	1	0
442	Male	61	1	1	2020-10-12	1899-12-31 15:25:00	2020-10-12	1899-12-31 17:50:00	2020-10-17	5	1	Cold dew	Large Artery Atherosclerosis Type	1	0	2020-10-16	1	1	0	0	0	0	0	0	0	0	0	0	0	0	129	70	90	20	100	36.4	5	0	1	2	0	0	7.8	1	0	1	0	1	0
443	Male	64	1	1	2020-10-15	1899-12-31 21:00:00	2020-10-15	1899-12-31 22:35:00	2020-10-23	8	1	Cold dew	Large Artery Atherosclerosis Type	1	0	2022-10-10	1	0	0	0	0	1	0	0	0	0	0	0	0	0	141	95	85	20	98	36.2	0	2	1		0	0	7.3	1	0	1	0	1	1
444	Male	46	1	1	2020-10-16	1899-12-31 20:00:00	2020-10-16	1899-12-31 20:58:00	2020-10-22	6	1	Cold dew	Large Artery Atherosclerosis Type	1	0	2020-10-22	1	1	0	0	0	0	0	0	0	0	0	0	0	0	157	101	112	16	100	36.9	1	0	1	1	0	0	8	1	0	0	0	0	0
445	Male	45	1	2	2020-10-18	1899-12-31 14:00:00	2020-10-18	1899-12-31 15:45:00	2020-10-26	8	1	Cold dew	Large Artery Atherosclerosis Type	1	0	2022-11-07	1	1	0	0	0	1	0	0	0	0	0	0	1	1	186	117	71	16	100	36.8	4	3	1	3	0	0	6.1	1	0	0	1	1	0
446	Female	84	1	2	2020-10-18	1899-12-31 10:30:00	2020-10-18	1899-12-31 11:26:00	2020-10-23	5	1	Cold dew	Large Artery Atherosclerosis Type	1	0	2021-12-28	1	1	0	1	0	1	0	0	0	0	0	0	0	0	194	89	50	16	99	36.3	1	2	1	5	0	0	5.4	1	0	0	0	1	0
447	Male	82	2	1	2020-10-22	1899-12-31 22:10:00	2020-10-23	1899-12-31 05:50:00	2020-11-04	12	1	Frost's Descent	Large Artery Atherosclerosis Type	1	0	2020-12-09	1	1	0	0	0	0	0	0	0	0	0	1	0	0	171	86	45	17	98	36.7	18	5	2	3	0	0	7.3	0	0	1	0	0	0
448	Male	87	2	1	2020-10-24	1899-12-31 21:00:00	2020-10-25	1899-12-31 06:53:00	2020-11-05	11	1	Frost's Descent	Small Artery Occlusion Type	1	0	2022-05-23	1	1	0	0	0	0	0	0	0	0	0	1	0	0	210	119	59	17	100	36.7	9	4	3	3	0	0	5.7	1	0	0	0	0	0
449	Male	70	1	2	2020-10-24	1899-12-31 08:40:00	2020-10-24	1899-12-31 09:12:00	2020-12-24	61	1	Frost's Descent	Intracerebral Hemorrhage	2	7	2021-03-09	1	1	1	0	0	1	1	0	0	0	0	0	0	0	200	90	92	23	99	36.7		5			0	0	8	0	0	1	0	0	0
450	Male	61	1	1	2020-10-25	1899-12-31 06:30:00	2020-10-25	1899-12-31 09:40:00	2020-11-05	11	1	Frost's Descent	Intracerebral Hemorrhage	2	3	2021-02-26	1	1	0	1	0	0	0	0	0	0	0	0	0	0	172	96	64	18	98	36	2	3	1		0	0	7.6	0	0	0	0	0	0
451	Female	74	1	1	2020-10-25	1899-12-31 14:50:00	2020-10-25	1899-12-31 15:18:00	2020-11-02	8	1	Frost's Descent	Large Artery Atherosclerosis Type	3	0	2022-12-27	1	0	0	0	0	0	0	0	0	0	0	1	0	0	220	112	77	22	98	36.5	0	0	1	1	0	0	5.8	1	0	1	0	1	0
452	Male	51	2	1	2020-10-26	1899-12-31 07:40:00	2020-10-26	1899-12-31 12:28:00	2020-11-05	10	1	Frost's Descent	Large Artery Atherosclerosis Type	1	0	2023-04-03	1	1	0	0	0	0	0	0	0	0	0	0	1	1	143	86	56	20	95	36.3	3	2	1	2	0	0	6.7	1	0	0	0	0	0
453	Male	78	2	2	2020-10-26	1899-12-31 16:00:00	2020-10-26	1899-12-31 19:47:00	2020-11-15	20	2	Frost's Descent	Large Artery Atherosclerosis Type	1	0	2020-11-14	2	1	0	0	0	1	0	0	0	0	0	0	0	0	170	97	100	20	100	36.5	7	4	5	4	0	0	7.2	1	0	0	0	0	0
454	Female	81	1	1	2020-10-29	1899-12-31 19:25:00	2020-10-29	1899-12-31 20:38:00	2020-11-09	11	1	Frost's Descent	Cerebral Infarction	1	0	2023-04-02	1	1	0	1	0	0	0	0	0	0	0	0	0	0	159	85	87	21	98	36.7	1	1	1	3	0	0	6.5	1	0	1	0	0	0
455	Male	55	1	1	2020-10-31	1899-12-31 16:00:00	2020-10-31	1899-12-31 22:20:00	2020-11-10	10	1	Frost's Descent	Large Artery Atherosclerosis Type	1	0	2022-08-15	1	0	0	0	0	0	0	0	0	0	0	0	0	0	142	84	81	20	98	36.7	1	1	1	2	0	0	8.5	1	0	1	0	1	0
456	Male	80	1	2	2020-10-31	1899-12-31 23:00:00	2020-11-01	1899-12-31 09:25:00	2020-11-10	9	1	Frost's Descent	Large Artery Atherosclerosis Type	1	0	2020-11-10	1	0	0	0	0	0	1	0	0	0	0	1	0	0	133	72	87	18	100	36.4	13	5	3		0	0	5.7	0	0	0	0	0	0
457	Female	66	1	1	2020-11-01	1899-12-31 18:30:00	2020-11-01	1899-12-31 20:55:00	2020-11-06	5	1	Frost's Descent	Large Artery Atherosclerosis Type	1	0	2022-12-14	1	1	1	0	0	0	0	0	0	0	0	0	0	0	165	89	88	20	98	36.5	5	2	1	3	0	0	6.7	1	0	0	0	1	0
458	Male	61	1	1	2020-11-03	1899-12-31 08:30:00	2020-11-03	1899-12-31 11:45:00	2020-11-17	14	1	Start of winter	Small Artery Occlusion Type	1	0	2020-11-23	1	1	1	0	0	0	0	0	0	0	0	0	0	0	167	99	87	20	97	36.6	6				0	0	28.9	0	0	1	0	1	0
459	Male	73	1	1	2020-11-04	1899-12-31 20:06:00	2020-11-05	1899-12-31 10:40:00	2020-11-13	8	1	Frost's Descent	Large Vessel Occlusion		0	2021-12-27	1	0	1	0	0	0	0	0	0	0	0	0	0	0	165	86	81	18	99	36.7	3	4	1	3	0	0	11.5	1	0	1	0	0	0
460	Male	67	1	1	2020-11-05	1899-12-31 20:40:00	2020-11-05	1899-12-31 20:45:00	2020-11-12	7	1	Frost's Descent	Large Artery Atherosclerosis Type	1	0	2020-12-27	1	1	0	0	0	0	0	0	0	0	0	0	0	0	141	90	85	20	97	36.1	5	3	1	3	0	0	10.1	1	1	0	0	0	0
461	Male	36	1	1	2020-11-08	1899-12-31 14:10:00	2020-11-08	1899-12-31 14:30:00	2020-11-08	0	1	Frost's Descent	TIA	3	0	2020-11-08	1	0	0	0	0	0	0	0	0	0	0	0	0	0	116	73	74	20	98	36.7	0				0	0	5.6	1	0	0	0	0	0
462	Male	50	1	1	2020-11-08	1899-12-31 21:00:00	2020-11-08	1899-12-31 22:09:00	2020-11-14	6	1	Start of winter	TIA	3	0	2020-11-14	1	1	0	0	0	0	0	0	0	0	0	1	0	0	142	81	90	15	99	36.7	1	3	1	1	0	0	10.3	0	0	1	0	0	0
463	Male	53	1	1	2020-11-09	1899-12-31 12:00:00	2020-11-09	1899-12-31 13:40:00	2020-11-18	9	1	Start of winter	Acute cerebral infarction	1	0	2022-07-15	1	0	0	0	0	0	0	0	0	0	0	0	0	0	180	100	74	20	99	36.7	11	4	1	1	0	0	9.7	0	0	0	0	0	0
464	Female	79	2	1	2020-11-09	1899-12-31 18:16:00	2020-11-09	1899-12-31 18:46:00	2020-12-27	48	1	Start of winter	Intracerebral Hemorrhage	2	16	2022-06-28	1	1	0	0	0	0	0	0	0	0	0	0	0	0	222	138	80	25	98	36	31				0	0	9.2	0	0	0	0	0	0
465	Female	84	1	1	2020-11-09	1899-12-31 06:00:00	2020-11-09	1899-12-31 08:10:00	2020-11-20	11	1	Start of winter	Small Artery Occlusion Type	1	0	2021-07-11	2	1	0	1	0	1	0	0	0	0	0	0	0	0	166	75	79	19	98	36.3	4	3	1	3	0	0	8.7	0	0	0	0	0	0
466	Male	68	2	1	2020-11-10	1899-12-31 05:05:00	2020-11-10	1899-12-31 05:48:00	2020-11-21	11	2	Start of winter	Intracerebral Hemorrhage	2	30	2020-11-20	2	1	1	0	1	1	0	0	0	0	0	0	0	0	95	62	82	18	75	36.5	31	5	5		0	0	10.8	0	1	0	0	0	0
467	Female	59	2	1	2020-11-10	1899-12-31 12:50:00	2020-11-10	1899-12-31 13:35:00	2020-11-14	4	1	Start of winter	Small Artery Occlusion Type	1	0	2023-02-28	2	0	0	0	1	0	0	0	1	0	0	1	0	0	137	72	88	23	97	36.5	2	2	1	1	0	0	7	1	0	0	0	1	0
468	Male	65	1	1	2020-11-10		2020-11-11	1899-12-31 01:10:00	2020-11-12	1	1	Start of winter	Intracerebral Hemorrhage	2	48	2020-11-12	1	1	0	0	0	1	0	0	0	0	0	0	0	0	213	76	23	79	22	36.9	5	5	5	2	0	0	8.1	0	0	0	0	0	0
469	Male	69	1	1	2020-11-12	1899-12-31 07:10:00	2020-11-12	1899-12-31 09:00:00	2020-12-07	25	1	Start of winter	Intracerebral Hemorrhage	2	100	2020-12-07	1	1	1	0	0	0	0	0	0	0	0	0	0	1	210	116	78	23	99	36.7	18	0	0	0	0	0	15.2	0	0	0	0	0	0
470	Male	66	1	1	2020-11-15	1899-12-31 02:00:00	2020-11-15	1899-12-31 08:20:00	2020-11-21	6	1	Start of winter	TIA	3	0	2022-10-12	1	0	0	0	0	0	0	0	0	0	0	0	0	0	178	80	102	17	99	36.2	0	3	1	3	6	0	6.4	1	0	0	0	1	0
471	Male	70	1	1	2020-11-15	1899-12-31 16:30:00	2020-11-15	1899-12-31 21:09:00	2020-11-26	11	1	Start of winter	Intracerebral Hemorrhage	2	2.5	2021-09-10	1	0	0	0	0	0	0	0	0	0	0	0	0	0	218	108	76	20	98	36.6	1	1	1	1	0	0	7.8	1	0	1	0	1	0
472	Male	65	2	1	2020-11-16	1899-12-31 12:22:00	2020-11-16	1899-12-31 12:58:00	2020-12-01	15	1	Start of winter	Intracerebral Hemorrhage	2	4	2022-10-13	1	1	0	0	0	0	0	0	0	0	0	1	0	0	191	124	75	20	99	36.8	7	4	2	2	0	0	4	0	0	0	0	0	0
473	Male	70	1	1	2020-11-19	1899-12-31 02:00:00	2020-11-19	1899-12-31 09:58:00	2020-11-27	8	1	Start of winter	Large Artery Atherosclerosis Type	1	0	2021-08-15	1	1	0	0	0	0	0	0	0	0	0	0	0	0	138	76	76	20	99	36.7	2	4	1	2	0	0	7.4	1	0	0	0	1	0
474	Male	70	1	1	2020-11-18	1899-12-31 18:00:00	2020-11-19	1899-12-31 15:09:00	2020-12-04	15	1	Start of winter	Large Artery Atherosclerosis Type	1	0	2022-12-23	1	1	0	0	0	0	0	0	0	0	0	0	1	1	130	89	103	22	99	36.5	7	4	3	2	0	0	7.5	1	0	1	0	1	0
475	Male	62	2	1	2020-11-26	1899-12-31 17:00:00	2020-11-27	1899-12-31 09:03:00	2020-12-02	5	2	Light Snow	Large Artery Atherosclerosis Type	1	0	2020-12-01	2	1	1	0	0	1	0	0	0	0	0	0	0	0	170	89	88	20	91	36.3	23	5	5	4	0	0	14.5	1	1	0	1	0	0
476	Female	59	1	2	2020-01-28	1899-12-31 01:30:00	2020-11-28	1899-12-31 08:18:00	2020-12-18	20	1	Light Snow	Cerebral infarction with hemorrhagic transformation	1	0	2023-02-23	2	0	0	0	1	1	0	0	0	0	0	1	0	0	159	72	75	20	98	36.8	8	4	1		0	5	6.9	1	0	0	0	1	0
477	Male	57	2	1	2020-11-28	1899-12-31 09:00:00	2020-11-28	1899-12-31 18:25:00	2020-12-05	7	1	Light Snow	Acute cerebral infarction	1	0	2020-12-23	1	0	0	0	0	0	0	0	0	0	0	0	0	0	182	110	75	20	100	36.5	1	0	1	2	0	0	7.7	1	0	0	0	1	0
478	Male	44	1	1	2020-11-29	1899-12-31 12:00:00	2020-11-29	1899-12-31 13:25:00	2020-12-11	12	1	Light Snow	Intracerebral Hemorrhage	2	8	2021-01-03	1	1	0	0	0	0	0	0	0	0	0	0	0	0	170	120	90	24	96	36.2	11	5	2	1	0	0	7	0	0	0	0	0	0
479	Female	65	1	2	2020-11-30	1899-12-31 04:00:00	2020-11-30	1899-12-31 14:11:00	2020-12-07	7	1	Light Snow	Large Artery Atherosclerosis Type	1	0	2021-07-12	1	1	0	0	0	1	0	0	0	0	0	0	0	0	165	92	85	21	99	36.8	2	1	1	3	0	0	7.9	1	0	0	0	1	0
480	Male	38	1	1	2020-11-29	1899-12-31 20:40:00	2020-11-30	1899-12-31 00:17:00	2021-01-16	47	1	Light Snow	Intracerebral Hemorrhage	2	14.6	2021-01-16	2	1	0	0	0	0	0	0	0	0	0	0	0	0	193	106	77	38	98	36.1	38				0	0	8.6	0	0	0	0	0	0
481	Male	49	1	1	2020-11-30	1899-12-31 22:30:00	2020-11-30	1899-12-31 22:43:00	2020-12-08	8	1	Light Snow	TIA	3	0	2022-10-08	1	1	0	0	0	0	1	0	0	0	0	0	0	0	205	112	92	20	97	36.1	3	3	1	1	2	0	7.6	1	0	1	0	1	0
482	Female	83	1	2	2020-12-01	1899-12-31 05:00:00	2020-12-01	1899-12-31 06:13:00	2020-12-07	6	1	Light Snow	TIA	3	0	2020-12-07	1	1	1	1	0	1	0	0	0	0	0	0	0	0	108	54	56	18	98	36.1	7	5	2	4	0	0	8.5	1	0	0	0	0	0
483	Female	62	2	1	2020-12-02	1899-12-31 19:10:00	2020-12-02	1899-12-31 19:43:00	2020-12-10	8	1	Light Snow	Cerebral Infarction	1	0	2023-04-09	1	1	0	0	0	0	0	0	0	0	0	0	0	0	200	121	67	20	99	36.7	0	1	1	1	0	0	7	0	0	1	0	1	0
484	Male	73	1	1	2020-12-07	1899-12-31 07:26:00	2020-12-07	1899-12-31 08:26:00	2020-12-15	8	1	Major Snow	Cardioembolic Type	1	0	2021-04-07	1	1	1	1	1	0	0	0	0	0	0	0	0	0	169	70	75	18	98	36.5	19	4	3	4	0	9	7.8	1	0	0	0	0	0
485	Female	84	1	1	2020-12-07	1899-12-31 14:10:00	2020-12-07	1899-12-31 15:10:00	2020-12-14	7	1	Major Snow	Cerebral Infarction	1	0	2023-02-20	1	0	0	0	0	0	0	0	0	0	0	0	0	0	148	82	82	21	98	36.8	0	1	1	4	4	0	7.4	0	0	1	0	0	0
486	Female	60	2	1	2020-12-09	1899-12-31 10:30:00	2020-12-09	1899-12-31 13:50:00	2020-12-31	22	1	Major Snow	Intracerebral Hemorrhage	2	43	2021-01-14	1	1	0	0	0	0	0	0	0	0	0	1	0	0	185	92	82	20	98	36.3	15	5	5		0	0	7.3	0	0	0	0	0	0
487	Female	94	2	1	2020-12-09	1899-12-31 21:00:00	2020-12-09	1899-12-31 21:33:00	2020-12-17	8	1	Major Snow	Acute cerebral infarction	1	0	2020-12-17	1	1	0	0	0	0	0	0	0	0	0	0	0	0	135	102	60	22	98	36.5	14	4	3	4	0	4	5.4	1	0	0	0	0	0
488	Male	58	1	1	2020-12-09	1899-12-31 17:20:00	2020-12-09	1899-12-31 18:00:00	2020-12-16	7	1	Major Snow	Acute cerebral infarction	1	0	2020-12-16	1	0	0	0	0	0	0	0	0	0	1	0	0	0	195	120	100	21	99	36.5	35	5	5	1	0	0	5.8	1	0	0	0	0	0
489	Female	61	1	1	2020-12-10	1899-12-31 09:00:00	2020-12-10	1899-12-31 11:46:00	2020-12-18	8	1	Major Snow	Large Artery Atherosclerosis Type	1	0	2020-12-18	1	1	0	0	0	0	0	0	0	0	0	0	0	0	115	78	78	15	100	36.3	14	5	3	1	0	0	8.6	1	0	0	0	1	0
490	Male	44	1	1	2020-12-11	1899-12-31 01:10:00	2020-12-11	1899-12-31 02:41:00	2021-01-19	39	1	Major Snow	Intracerebral Hemorrhage	2	5	2022-12-05	1	1	0	0	0	0	0	0	0	0	0	0	0	0	213	122	100	25	98	36.8	20	5	5		0	0	8.4	0	0	0	0	0	0
491	Female	68	2	1	2020-12-17	1899-12-31 17:30:00	2020-12-17	1899-12-31 20:47:00	2020-12-24	7	1	Major Snow	TIA	3	0	2023-03-10	1	1	1	0	0	0	0	0	0	0	0	0	0	0	208	91	107	19	99	36.3	0	0	1	4	0	0	7.7	1	0	0	0	1	0
492	Male	66	2	1	2020-12-17	1899-12-31 16:00:00	2020-12-18	1899-12-31 10:20:00	2020-12-22	4	1	Major Snow	Large Artery Atherosclerosis Type	1	0	2020-12-22	1	1	1	0	0	1	0	0	0	0	0	0	0	0	135	86	88	19	96	36.5	8	4	3	4	0	0	7.5	1	0	1	0	1	0
493	Male	55	1	1	2020-12-19	1899-12-31 03:00:00	2020-12-19	1899-12-31 08:57:00	2020-12-20	1	1	Major Snow	Intracerebral Hemorrhage	2	21	2020-12-19	1	0	0	0	0	0	1	0	0	0	0	0	0	0	232	132	122	28	91	36.9					0	0	7.8	0	0	0	0	0	0
494	Male	77	1	2	2021-01-01	1899-12-31 21:25:00	2021-01-01	1899-12-31 23:28:00	2021-01-06	5	1	Winter Solstice Festival	Large Artery Atherosclerosis Type	1	0	2022-01-22	1	0	0	0	0	1	0	0	0	1	0	0	1	1	120	77	88	20	100	36.7	7	4	1	4	0	0	6.4	1	0	0	0	1	0
495	Female	74	1	2	2021-01-01	1899-12-31 19:35:00	2021-01-01	1899-12-31 20:33:00	2021-01-07	6	1	Winter Solstice Festival	Large Artery Atherosclerosis Type	1	0	2021-04-07	1	1	0	0	0	1	0	0	0	0	0	0	0	0	159	73	117	22	99	37.4	2	2	2	3	0	0	5.6	1	1	0	0	1	0
496	Male	73	1	1	2020-12-31	1899-12-31 22:00:00	2021-01-01	1899-12-31 17:59:00	2021-01-08	7	1	Winter Solstice Festival	Large Artery Atherosclerosis Type	1	0	2022-08-11	1	1	0	0	0	0	0	0	0	0	0	0	1	0	161	91	89	20	96	36.7	8	4	2	4	0	0	8.9	1	0	0	0	1	0
497	Male	70	2	1	2021-01-01	1899-12-31 18:00:00	2021-01-01	1899-12-31 19:56:00	2021-01-16	15	1	Winter Solstice Festival	Large Artery Atherosclerosis Type	1	0	2021-09-07	1	1	0	0	0	0	0	0	0	0	1	0	0	0	170	74	86	18	100	36.4	1	1	1	3	0	0	5.5	1	0	0	1	1	0
498	Female	77	1	1	2021-01-02	1899-12-31 10:58:00	2021-01-03	1899-12-31 03:58:00	2021-01-13	10	1	Winter Solstice Festival	Large Artery Atherosclerosis Type	1	0	2023-03-30	1	1	0	0	0	0	0	0	0	0	0	0	0	0	201	109	100	18	99	36.5	15	4	1	3	0	0	7.5	1	0	0	0	0	0
499	Male	90	1	1	2021-01-03	1899-12-31 04:30:00	2021-01-03	1899-12-31 05:42:00	2021-01-03	0	1	Winter Solstice Festival	Intracerebral Hemorrhage	2	4.2	2021-01-03	1	1	0	0	0	0	0	0	0	0	0	0	0	0	167	100	102	22	97	36.7	14				0	0	6	0	0	0	0	0	0
500	Male	65	2	1	2020-12-22	1899-12-31 02:00:00	2020-12-22	1899-12-31 07:40:00	2020-12-28	6	1	Winter Solstice Festival	Acute cerebral infarction	1	0	2021-02-25	1	0	0	0	0	0	0	0	0	0	1	0	0	0	170	103	121	20	95	36.3	5	2	2	2	0	0	8.2	1	0	0	0	0	0
501	Female	85	1	1	2020-12-23	1899-12-31 15:00:00	2020-12-23	1899-12-31 20:55:00	2021-01-11	19	1	Winter Solstice Festival	Large Artery Atherosclerosis Type	1	0	2021-01-11	1	1	1	0	0	0	0	0	0	0	0	0	0	0	189	87	97	17	98	36.7	12	4	4	4	0	0	13	1	1	0	0	0	0
502	Female	67	1	1	2020-12-23	4;00	2020-12-23	1899-12-31 12:46:00	2020-12-31	8	1	Winter Solstice Festival	Cardioembolic Type	1	0	2022-12-24	2	0	0	0	1	0	0	0	0	0	0	1	0	0	145	90	136	30	98	36.5	13	5	5		0	0	6.1	1	0	0	0	0	0
503	Female	70	1	1	2020-12-24	1899-12-31 10:40:00	2020-12-24	1899-12-31 12:27:00	2020-12-31	7	1	Winter Solstice Festival	Intracerebral Hemorrhage	2	1.3	2023-04-03	1	0	0	0	0	0	0	0	0	0	0	0	0	0	161	101	67	20	98	36.3	1	2	1	1	0	0	5.4	1	0	1	0	1	0
504	Male	69	1	1	2020-12-25	1899-12-31 20:30:00	2020-12-25	1899-12-31 21:45:00	2021-01-02	8	1	Winter Solstice Festival	Large Artery Atherosclerosis Type	1	0	2022-10-21	1	1	0	0	0	1	0	0	0	0	0	1	0	0	247	159	102	20	97	36.8	15	5	5	3	0	0	7.8	0	0	0	0	0	0
505	Male	71	1	1	2020-12-25	1899-12-31 22:00:00	2020-12-26	1899-12-31 12:55:00	2021-01-02	7	1	Winter Solstice Festival	Cardioembolic Type	1	0	2021-01-02	1	1	0	1	1	1	0	0	0	0	0	0	0	0	142	109	109	18	99	36.2	11	5	2	5	0	5	5.5	0	1	0	0	0	0
506	Male	79	2	1	2020-12-28	1899-12-31 12:00:00	2020-12-28	1899-12-31 13:20:00	2021-01-11	14	1	Winter Solstice Festival	Large Artery Atherosclerosis Type	1	0	2021-03-20	1	1	0	0	0	0	0	0	0	0	0	0	0	0	184	102	95	20		36.5	8	2	2	5	0	0		1	0	1	0	1	0
507	Female	84	1	1	2020-12-29	1899-12-31 12:10:00	2020-12-29	1899-12-31 13:05:00	2021-01-08	10	1	Winter Solstice Festival	Large Artery Atherosclerosis Type	1	0	2023-03-21	1	1	0	0	0	0	0	0	0	0	0	0	0	0	136	68	104	19	99	36.4	5	4	1	3	0	0	7.3	1	0	1	0	0	0
508	Male	68	2	1	2020-12-29	1899-12-31 19:30:00	2020-12-29	1899-12-31 21:00:00	2021-01-03	5	1	Winter Solstice Festival	Acute cerebral infarction	1	0	2021-02-01	1	0	0	0	0	0	0	0	0	0	0	1	0	0	160	93	55	20	100	36.6	2	1	1	2	0	0	5.9	1	0	0	0	0	0
509	Female	80	1	1	2020-12-30	1899-12-31 05:00:00	2020-12-30	1899-12-31 07:48:00	2021-01-08	9	1	Winter Solstice Festival	Large Artery Atherosclerosis Type	1	0	2023-03-20	1	1	0	0	0	0	0	0	0	0	0	1	0	0	172	86	70	24	99	36.9	7	4	4	3	0	0	5.8	1	0	1	1	1	0
510	Female	63	2	1	2020-12-31	1899-12-31 15:00:00	2020-12-31	1899-12-31 18:06:00	2021-01-05	5	1	Winter Solstice Festival	Large Artery Atherosclerosis Type	1	0	2023-03-27	1	1	0	0	0	0	0	0	0	0	0	0	0	0	183	103	79	12	100	36.8	2	3	1	1	0	0		1	0	0	0	1	0
511	Female	83	2	2	2020-12-31	1899-12-31 18:00:00	2020-12-31	1899-12-31 19:06:00	2021-01-14	14	1	Winter Solstice Festival	Large Artery Atherosclerosis Type	1	0	2021-07-28	2	0	0	0	1	1	0	0	0	0	0	0	0	0	131	63	65	19	99	36.3	21	5	4	5	0	7	7.7	1	0	1	0	1	0
512	Male	68	1	2	2019-10-16	1899-12-31 14:35:00	2019-10-16	1899-12-31 15:12:00	2019-10-27	11	1	Cold dew	Large Artery Atherosclerosis Type	1	0	2023-02-02	1	1	1	1	0	1	0	1	0	0	0	0	0	0	142	90	76	18	98	36.8	3	3	1		7	0	4.3	1	0	1	0	0	0
513	Male	76	1	1	2019-10-19	1899-12-31 20:30:00	2019-10-19	1899-12-31 22:35:00	2019-10-25	6	1	Cold dew	Large Artery Atherosclerosis Type	1	0	2023-04-12	1	1	1	0	0	0	0	0	0	0	0	0	0	0	150	77	54	20	96	37	3	1	1		0	0	9.5	1	0	0	0	0	0
514	Male	82	2	1	2019-10-19	1899-12-31 16:00:00	2019-10-19	1899-12-31 18:24:00	2019-10-30	11	1	Cold dew	Large Artery Atherosclerosis Type	1	0	2020-04-22	1	0	0	0	0	0	0	0	0	0	0	0	0	0	157	81	78	20	97	36.9	4	3	1		0	0	5.4	1	0	0	0	0	0
515	Female	46	1	1	2019-10-20	1899-12-31 15:20:00	2019-10-20	1899-12-31 16:13:00	2019-12-16	57	1	Cold dew	Intracerebral Hemorrhage	2	28	2020-07-31	1	1	0	0	0	0	0	0	0	0	0	0	0	0	258	145	67	22	98	36.4		5	5		0	0	5.4	0	0	0	0	0	0
516	Male	61	1	1	2019-10-21	1899-12-31 16:00:00	2019-10-21	1899-12-31 18:18:00	2019-10-31	10	1	Cold dew	Acute cerebral infarction	1	0	2019-10-31	1	1	1	0	0	0	0	0	0	0	0	0	0	0	197	99	69	20	98	36.6	5	2	1		0	0	14.8	1	0	0	1	1	0
517	Male	69	1	1	2019-10-20	1899-12-31 23:00:00	2019-10-21	1899-12-31 02:39:00	2019-10-23	2	1	Cold dew	Large Artery Atherosclerosis Type	1	0	2019-10-31	1	0	0	0	0	0	0	1	1	0	0	0	0	0	118	90	86	20	98	36.8	21	5	3		0	0	11	0	1	0	0	0	0
518	Male	48	1	1	2019-10-31	1899-12-31 19:10:00	2019-10-31	1899-12-31 19:46:00	2019-11-06	6	1	Frost's Descent	Large Artery Atherosclerosis Type	1	0	2023-04-18	1	1	0	0	0	1	0	0	0	0	0	0	0	0	173	109	77	16	96	36.9	3	1	1	2	0	0	10.6	1	0	0	0	1	0
519	Male	60	1	1	2019-10-22	1899-12-31 17:30:00	2019-10-22	1899-12-31 18:30:00	2019-11-04	13	1	Cold dew	Large Artery Atherosclerosis Type	1	0	2019-12-09	1	0	0	0	0	0	0	0	0	0	0	1	1	0	178	103	79	20	100	36.6	2	1	1	2	0	0	3.4	1	0	0	0	0	0
520	Male	75	1	1	2019-10-23	1899-12-31 17:00:00	2019-10-23	1899-12-31 22:53:00	2019-10-31	8	1	Cold dew	Large Artery Atherosclerosis Type	1	0	2019-11-14	1	0	0	0	0	0	0	0	0	0	0	0	0	0	136	78	103	21	95	36.9	6	3	2		0	0	7.5	1	0	1	0	1	0
521	Female	60	1	1	2019-10-24	1899-12-31 09:30:00	2019-10-24	1899-12-31 17:55:00	2019-11-15	22	1	Frost's Descent	Large Artery Atherosclerosis Type	1	0	2019-11-15	1	0	0	0	0	0	0	0	0	0	0	1	0	0	138	65	43	20	99	36.7	20	5	2		0	0	7.6	1	0	0	0	1	0
522	Male	57	1	1	2019-10-26	1899-12-31 20:50:00	2019-10-26	1899-12-31 21:09:00	2019-11-10	15	1	Frost's Descent	Large Artery Atherosclerosis Type	1	0	2020-12-14	1	1	0	0	0	1	0	0	0	0	0	0	0	0	189	75	68	18	100	36.7	2	1	1		0	0	7.3	1	1	0	0	0	0
523	Female	79	1	1	2019-11-05	1899-12-31 17:30:00	2019-11-05	1899-12-31 18:37:00	2019-11-24	19	1	Frost's Descent	Cardioembolic Type	1	0	2023-03-22	1	1	1	1	1	0	0	0	0	0	0	0	0	0	135	70	82	20	96	36.7	17	4	3		0	6	17.1	0	1	0	0	0	0
524	Male	85	1	1	2019-11-06	1899-12-31 18:00:00	2019-11-06	1899-12-31 22:49:00	2019-11-07	1	1	Frost's Descent	Cardioembolic Type	1	0	2019-11-07	1	0	0	0	1	0	0	0	0	0	0	0	0	0	147	86	73	20	98	36.4	21	5	4		0	5	6.4	0	0	0	0	0	1
525	Female	66	1	1	2019-11-06	1899-12-31 11:40:00	2019-11-06	1899-12-31 11:50:00	2019-11-13	7	1	Frost's Descent	Large Artery Atherosclerosis Type	1	0	2023-04-17	1	0	0	0	0	1	0	0	0	0	0	0	0	0	139	76	78	20	100	36.5	8	4	1	4	0	0	6.4	1	0	1	0	1	0
526	Female	70	1	1	2019-11-07	1899-12-31 11:00:00	2019-11-07	1899-12-31 22:47:00	2019-11-13	6	1	Start of winter	Large Artery Atherosclerosis Type	1	0	2020-05-12	1	0	0	0	0	0	0	0	0	0	0	0	0	0	262	142	104	20		36.9	2	3	1	1	0	0	7.1	1	0	0	0	0	0
527	Male	53	1	1	2019-11-07	1899-12-31 11:30:00	2019-11-07	1899-12-31 12:43:00	2019-11-16	9	1	Frost's Descent	Large Artery Atherosclerosis Type	1	0	2021-09-04	1	1	0	0	0	1	0	0	0	0	0	1	0	0	149	102	65	18	100	36.1	3	2	1	3	0	0	5.9	1	0	1	0	0	0
528	Male	55	1	1	2019-11-08	1899-12-31 10:30:00	2019-11-08	1899-12-31 13:45:00	2019-11-19	11	1	Start of winter	Large Artery Atherosclerosis Type	1	0	2019-11-19	1	1	1	1	0	1	0	0	0	0	0	0	0	0	164	117	95	20	96	37	5	2			0	0	10.9	1	0	0	0	0	0
529	Male	86	1	1	2019-11-09	1899-12-31 21:45:00	2019-11-09	1899-12-31 22:41:00	2019-11-14	5	1	Start of winter	TIA	3	0	2022-07-17	1	0	0	0	0	0	0	0	0	0	0	0	0	0	106	66	66	19	98	36.8	0	0	1		6	0	6.5	1	0	1	0	0	0
530	Male	64	1	1	2019-11-08	1899-12-31 16:00:00	2019-11-09	1899-12-31 07:55:00	2019-11-23	14	1	Start of winter	Large Artery Atherosclerosis Type	1	0	2023-03-23	1	1	0	0	0	1	0	0	0	0	0	0	0	0	144	76	89	20	98	36.3	3	3	1		0	0	10.4	1	0	1	0	1	0
531	Female	85	1	1	2019-11-11	1899-12-31 20:00:00	2019-11-11	1899-12-31 21:06:00	2019-11-16	5	1	Start of winter	Large Artery Atherosclerosis Type	1	0	2022-02-09	2	1	0	1	0	1	0	0	0	0	0	0	0	0	164	55	103	20	98	36.6	11	3	1	7	0	0	8.9	0	0	1	0	0	0
532	Male	66	1	1	2019-11-11	1899-12-31 14:00:00	2019-11-11	1899-12-31 15:55:00	2019-11-29	18	1	Start of winter	Cardioembolic Type	1	0	2022-11-30	1	1	1	1	1	0	0	0	0	0	0	0	0	0	150	99	96	20	100	36.5	22	5	5		0	6	6.5	0	1	0	0	0	0
533	Male	63	1	2	2019-11-12	1899-12-31 22:00:00	2019-11-13	1899-12-31 00:04:00	2019-11-30	17	1	Start of winter	Small Artery Occlusion Type	1	0	2021-09-17	1	1	1	0	0	1	0	0	0	0	0	0	0	0	177	103	92	20	95	36.2	2	3	3		0	0	10.4	1	0	1	1	1	0
534	Female	90	1	1	2019-11-14	1899-12-31 11:45:00	2019-11-14	1899-12-31 13:57:00	2020-01-23	70	1	Start of winter	Cardioembolic Type	1	0	2023-04-18	1	1	0	1	1	0	0	0	0	0	0	0	0	0	147	93	76	20	97	36.7	17	5	2	4	0	6	4.9	0	0	0	0	0	0
535	Female	81	1	1	2019-11-15	1899-12-31 07:00:00	2019-11-15	1899-12-31 12:12:00	2019-11-22	7	1	Start of winter	Large Artery Atherosclerosis Type	1	0	2020-12-12	1	1	1	1	0	0	0	0	0	0	0	1	0	0	170	100	87	20	97	36.5	10	4	2	4	0	0	11.5	1	0	0	0	0	0
536	Male	81	1	1	2019-11-17	1899-12-31 12:15:00	2019-11-17	1899-12-31 12:50:00	2019-11-29	12	1	Start of winter	Posterior Circulation Ischemia	3	0	2020-03-31	1	0	0	0	0	0	1	1	1	1	0	0	0	0	105	76	72	15	96	36.6	0	2	2		0	0	18	0	0	0	0	0	0
537	Male	63	1	1	2019-11-18	1899-12-31 07:10:00	2019-11-18	1899-12-31 08:14:00	2019-12-09	21	1	Start of winter	Intracerebral Hemorrhage	2	7.5	2020-06-28	2	1	0	0	0	0	0	0	0	0	0	0	0	0	144	85	120	20	95	37.1	7				0	0	6.4	0	0	0	0	0	0
538	Female	83	1	1	2019-11-18	1899-12-31 09:00:00	2019-11-18	1899-12-31 14:02:00	2019-11-29	11	1	Start of winter	Cerebral Infarction	1	0	2019-11-29	1	1	1	0	0	1	0	0	0	0	0	0	0	0	130	60	80	20	98	36.5	2	2	1	7	0	0	8.4	1	0	0	0	0	0
539	Male	51	2	1	2019-11-19	1899-12-31 13:30:00	2019-11-19	1899-12-31 16:46:00	2019-11-25	6	1	Start of winter	Large Artery Atherosclerosis Type	1	0	2022-11-16	1	0	0	0	0	0	0	0	0	0	0	0	0	1	199	109	65	18	99	36.5	3	1	1		0	0	17.3	1	0	0	1	0	0
540	Female	33	1	1	2019-11-18	1899-12-31 22:00:00	2019-11-19	1899-12-31 11:44:00	2019-11-21	2	1	Start of winter	Acute cerebral infarction	1	0	2019-11-21	1	1	0	0	0	0	0	0	0	0	0	0	0	0	150	85	70	18	98	36.6	20	5	5		0	0	5.9	0	1	0	0	0	1
541	Female	67	1	1	2019-11-19	1899-12-31 23:00:00	2019-11-20	1899-12-31 09:50:00	2019-12-03	13	1	Start of winter	Small Artery Occlusion Type	1	0	2020-01-13	1	1	0	0	0	1	0	0	0	0	0	0	0	0	209	112	104	19	98	37	1	2	1		0	0	7.5	1	0	0	0	0	0
542	Male	63	1	1	2019-11-21	1899-12-31 16:00:00	2019-11-21	1899-12-31 20:50:00	2019-11-28	7	1	Start of winter	Acute cerebral infarction	1	0	2019-11-28	1	1	0	1	0	0	0	0	0	0	0	0	0	0	169	89	88	20	97	37	4	3	2	4	0	0	8.7	0	0	1	0	0	0
543	Male	60	1	1	2019-11-24	1899-12-31 08:30:00	2019-11-24	1899-12-31 09:23:00	2019-12-03	9	1	Light Snow	Large Artery Atherosclerosis Type	1	0	2020-07-22	1	1	1	0	0	0	0	0	0	0	0	0	0	0	164	80	89	19	98	37	1	2	1		0	4	17.7	0	0	0	0	0	0
544	Male	86	2	1	2019-11-25	1899-12-31 13:00:00	2019-11-25	1899-12-31 14:35:00	2019-12-09	14	1	Light Snow	Large Artery Atherosclerosis Type	1	0	2020-02-10	1	1	0	0	0	1	0	0	0	0	0	0	0	0	169	69	90	19	100	37	17	5	2		0	0	7.5	1	0	0	1	0	0
545	Female	91	1	2	2019-11-26	1899-12-31 09:30:00	2019-11-26	1899-12-31 12:50:00	2019-12-01	5	1	Light Snow	Large Artery Atherosclerosis Type	1	0	2023-04-07	1	1	0	1	1	1	0	0	0	0	0	0	0	0	153	71	85	20	99	36.7	1	1	1		0	0	8	1	0	1	0	0	0
546	Male	47	1	1	2019-11-26	1899-12-31 16:00:00	2019-11-26	1899-12-31 16:10:00	2019-12-18	22	1	Light Snow	Large Artery Atherosclerosis Type	1	0	2019-12-18	1	0	0	0	0	0	0	0	0	0	0	0	0	0	196	111	113	20	98	36.7	2	2	5		0	0	9	1	0	0	0	1	0
547	Male	59	2	1	2019-11-27	1899-12-31 12:00:00	2019-11-27	1899-12-31 15:45:00	2019-12-03	6	1	Light Snow	Large Artery Atherosclerosis Type	1	0	2023-04-03	1	0	1	0	0	0	0	0	0	0	0	0	0	0	125	74	78	20	98	36.5	0				0	0	4.3	1	0	0	0	0	0
548	Female	53	2	1	2019-11-27	1899-12-31 14:00:00	2019-11-27	1899-12-31 20:46:00	2019-12-10	13	1	Light Snow	TIA	3	0	2019-12-11	1	1	0	0	0	0	0	0	0	0	0	0	0	0	120	72	64	16	99	36.7	1	0	1		0	0	10.7	0	0	0	0	1	0
549	Male	81	1	2	2019-11-28	1899-12-31 12:00:00	2019-11-28	1899-12-31 23:31:00	2019-12-12	14	1	Light Snow	Large Artery Atherosclerosis Type	1	0	2019-12-25	1	1	0	0	0	1	0	0	0	0	0	0	0	0	168	90	88	16	98	37	23	5	5	5	0	0	8	1	1	0	1	1	0
550	Female	79	1	1	2019-11-30	1899-12-31 09:30:00	2019-11-30	1899-12-31 11:46:00	2019-12-10	10	1	Light Snow	Large Artery Atherosclerosis Type	1	0	2020-09-16	1	1	0	0	0	0	1	0	0	0	1	0	0	0	178	102	72	18	99	36.5	14	5	2	4	0	7	6.6	1	1	0	0	0	0
551	Male	62	2	1	2019-12-02	1899-12-31 23:00:00	2019-12-03	1899-12-31 00:10:00	2019-12-19	16	1	Light Snow	Intracerebral Hemorrhage	2	25	2020-01-03	1	1	0	0	0	0	0	1	0	0	0	0	0	0	180	95	60	16	97	36.8	16				0	0	7.4	0	0	0	0	0	0
552	Male	71	2	1	2019-12-03	1899-12-31 08:00:00	2019-12-03	1899-12-31 11:05:00	2019-12-13	10	1	Light Snow	Large Artery Atherosclerosis Type	1	0	2023-01-04	1	1	0	1	0	1	0	0	0	0	0	0	0	0	141	104	113	16	100	36.6	2	1	1		0	0	7.1	1	0	1	0	1	0
553	Female	50	2	1	2019-12-03	1899-12-31 21:21:00	2019-12-03	1899-12-31 22:23:00	2019-12-05	2	1	Light Snow	Intracerebral Hemorrhage	2	90	2019-12-05	2	1	0	0	0	0	1	0	0	0	0	0	0	0	162	100	126	20	98	36	22	5	5		0	0	11.6	0	0	0	0	0	0
554	Female	78	2	1	2019-12-06	1899-12-31 08:30:00	2019-12-06	1899-12-31 19:27:00	2019-12-14	8	1	Light Snow	Cerebral Infarction	1	0	2019-12-14	1	1	0	0	0	0	0	0	0	0	0	0	0	0	179	91	71	17	98	36.7	2	2	1		0	0	6.8	1	0	1	0	1	0
555	Female	82	2	1	2019-12-08	1899-12-31 15:30:00	2019-12-08	1899-12-31 16:10:00	2019-12-17	9	1	Major Snow	Cerebral Infarction	1	0	2021-07-24	1	1	0	1	0	1	0	0	0	0	1	0	0	0	143	56	81	18	98	36.5			1		5	0	6.3	1	0	0	0	0	0
556	Female	58	1	1	2019-12-10	1899-12-31 19:30:00	2019-12-10	1899-12-31 20:48:00	2019-12-20	10	1	Major Snow	Lacunar Infarction due to Atherosclerosis	1	0	2022-01-11	1	0	0	0	0	0	0	0	0	0	0	0	0	0	200	105	85	18	99	36.8	4	2	1		0	0	6	1	0	0	0	1	0
557	Male	66	1	1	2019-12-10	1899-12-31 10:30:00	2019-12-10	1899-12-31 11:27:00	2019-12-17	7	1	Major Snow	Cerebral Infarction	3	0	2023-04-07	1	1	0	1	0	0	0	0	0	0	1	0	0	0	170	95	85	19	98	36.5	0			6	6	0	4.4	1	0	1	0	1	0
558	Male	53	1	1	2019-12-11	1899-12-31 08:00:00	2019-12-11	1899-12-31 10:41:00	2019-12-12	1	1	Major Snow	Small Artery Occlusion Type	1	0	2021-12-16	1	0	0	0	0	0	0	0	0	0	0	0	0	0	180	105	95	20		36.7	1		1		0	0	6.8	0	0	0	0	0	0
559	Male	53	1	1	2019-12-11	1899-12-31 13:00:00	2019-12-11	1899-12-31 20:00:00	2019-12-30	19	1	Major Snow	Cardioembolic Type	1	0	2020-03-10	1	1	0	1	1	0	0	0	0	0	0	0	0	0	125	70	128	28	90	36.2	29	5			0	4	6.6	0	0	0	0	0	0
560	Male	81	2	1	2019-12-13	1899-12-31 12:00:00	2019-12-13	1899-12-31 14:37:00	2019-12-23	10	1	Major Snow	Large Artery Atherosclerosis Type	1	0	2019-12-23	1	1	0	1	0	0	0	0	0	0	0	0	0	0	140	64	65	20	99	37.1	10	4	1		0	0	7.1	1	0	1	0	0	0
561	Female	69	1	1	2019-12-13	1899-12-31 20:00:00	2019-12-14	1899-12-31 03:57:00	2019-12-24	10	1	Major Snow	Large Artery Atherosclerosis Type	1	0	2020-01-07	1	1	1	0	0	1	0	0	0	0	0	0	0	0	170	85	76	18	98	36.7	7	5	2	4	0	0	9.7	1	0	1	1	0	0
562	Male	70	1	1	2019-12-13	1899-12-31 19:15:00	2019-12-14	1899-12-31 00:28:00	2020-01-04	21	1	Major Snow	Large Artery Atherosclerosis Type	1	0	2020-01-04	1	1	1	0	0	0	0	0	0	0	0	0	0	0	100	56	94	20	99	37.5	31	5	5		0	0	11.8	1	0	0	0	0	0
563	Female	68	2	1	2019-12-16	1899-12-31 16:30:00	2019-12-16	1899-12-31 18:43:00	2019-12-27	11	1	Major Snow	Large Artery Atherosclerosis Type	1	0	2021-10-07	1	1	1	1	0	0	0	0	0	0	0	0	0	0	174	89	86	16	100	36.9	3	2	2	4	0	0	8.3	1	0	0	0	0	0
564	Female	80	1	1	2019-12-17	1899-12-31 23:00:00	2019-12-18	1899-12-31 06:35:00	2019-12-31	13	1	Major Snow	Hemorrhage Cerebral Infarction	2	3	2020-12-29	1	1	1	0	0	0	0	0	1	0	0	0	0	0	239	121	109	20	100	36.6	9	4	1		0	0	6.1	0	0	0	0	0	0
565	Female	73	1	1	2019-12-17	1899-12-31 22:00:00	2019-12-18	1899-12-31 05:24:00	2020-02-02	46	1	Major Snow	Intracerebral Hemorrhage	2	0	2023-04-17	1	1	0	1	0	0	0	0	0	0	0	0	0	0	245	135	83	20	100	36.9	27	5			0	0	8.6	0	0	0	0	0	0
566	Male	50	1	1	2019-12-19	1899-12-31 12:00:00	2019-12-19	1899-12-31 12:20:00	2019-12-28	9	1	Major Snow	Intracerebral Hemorrhage	2	1	2020-08-07	1	1	0	0	0	0	0	0	0	0	0	0	0	0	163	94	86	18	95	36.6	2	1	1		0	0	6.5	0	0	0	0	0	0
567	Male	67	2	1	2019-12-19	1899-12-31 07:00:00	2019-12-19	1899-12-31 10:51:00	2019-12-26	7	1	Major Snow	Cardioembolic Type	1	0	2022-12-15	1	0	0	0	1	0	0	0	0	0	0	0	0	0	157	87	88	16	100	36.8	1	1	1		0	3	6.9	1	0	0	0	1	0
568	Female	51	1	1	2019-12-20	1899-12-31 19:00:00	2019-12-21	1899-12-31 01:57:00	2019-12-28	7	1	Major Snow	Acute cerebral infarction	1	0	2019-12-28	1	0	0	0	0	0	0	0	0	0	0	0	0	0	188	92	81	16	97	36.4	7	4	1		0	0	13.6	1	0	1	1	1	0
569	Female	44	1	1	2019-12-21	1899-12-31 20:00:00	2019-12-22	1899-12-31 09:18:00	2019-12-29	7	1	Winter Solstice Festival	Large Artery Atherosclerosis Type	1	0	2020-08-31	1	1	0	0	0	0	0	0	0	0	0	0	0	0	189	102	86	20	95	36.9	13	2	2	1	0	0	7	0	1	0	0	0	0
570	Male	63	1	1	2019-12-23	1899-12-31 06:30:00	2019-12-23	1899-12-31 10:33:00	2020-02-03	42	1	Winter Solstice Festival	Large Artery Atherosclerosis Type	1	0	2020-02-10	1	0	0	0	0	1	0	0	0	0	0	0	0	0	141	91	141	28	96	36.8	30	5		2	0	0	11.4	1	1	0	0	0	0
571	Female	43	1	1	2019-12-24	1899-12-31 18:40:00	2019-12-24	1899-12-31 19:58:00	2019-12-31	7	1	Winter Solstice Festival	Large Artery Atherosclerosis Type	1	0	2022-01-08	1	1	0	0	0	0	0	0	0	0	0	0	0	0	144	79	74	21	97	36.7	8	4	1		0	0	7.4	1	0	0	0	0	0
572	Female	89	1	1	2019-12-24	1899-12-31 10:00:00	2019-12-24	1899-12-31 22:10:00	2020-01-03	10	1	Winter Solstice Festival	Large Artery Atherosclerosis Type	1	0	2020-02-03	2	0	0	0	0	0	1	0	0	0	0	0	0	0	142	97	87	19	98	36.5	10	4	4		0	0	5.6	0	0	0	0	1	0
573	Male	67	1	2	2019-12-24	1899-12-31 22:00:00	2019-12-25	1899-12-31 16:28:00	2019-12-30	5	1	Winter Solstice Festival	Large Artery Atherosclerosis Type	1	0	2020-02-03	1	0	0	0	0	1	0	0	0	0	0	0	0	0	164	95	82	20	99	37	8	3	2	1	0	0	6.1	1	0	1	0	0	0
574	Male	53	1	1	2020-01-02	1899-12-31 12:00:00	2020-01-02	1899-12-31 20:15:00	2020-01-10	8	1	Winter Solstice Festival	Large Artery Atherosclerosis Type	1	0	2020-03-13	1	0	0	0	0	0	0	0	0	0	0	0	0	0	113	79	85	16	100	36.8	6	2	1		0	0	7	0	0	0	0	0	0
575	Male	82	1	1	2019-12-27	1899-12-31 06:30:00	2019-12-27	1899-12-31 09:31:00	2020-01-22	26	1	Major Snow	Intracerebral Hemorrhage	2	38	2020-01-22	1	0	0	0	0	0	0	0	0	0	0	1	0	0	163	76	71	15	97	36.8	5	4	2		0	0	6.4	0	0	0	0	0	0
576	Male	71	2	1	2019-12-26	1899-12-31 18:00:00	2019-12-27	1899-12-31 16:34:00	2019-12-29	2	1	Winter Solstice Festival	Cardioembolic Type	1	0	2019-12-29	1	0	0	1	1	0	0	0	0	0	0	0	0	0	152	84	84	20	98	37.2	19	5	5		0	4		0	1	0	0	0	0
577	Female	71	1	2	2019-12-27	1899-12-31 21:00:00	2019-12-27	1899-12-31 22:55:00	2019-12-31	4	2	Winter Solstice Festival	Large Artery Atherosclerosis Type	1	0	2019-12-30	2	1	0	0	0	0	0	0	0	0	0	0	0	0	234	130	88	20	98	36.5	27	5			0	0	7.7	0	0	0	0	0	1
578	Male	66	1	1	2019-12-26	1899-12-31 21:00:00	2019-12-27	1899-12-31 11:05:00	2019-12-31	4	1	Winter Solstice Festival	Large Artery Atherosclerosis Type	1	0	2019-12-31	1	0	0	0	0	0	0	0	0	0	0	0	0	0	145	95	89	18	98	36.7	9	4	2	1	0	0	8.5	1	0	1	0	0	0
579	Male	70	1	1	2019-12-28	1899-12-31 12:10:00	2019-12-28	1899-12-31 14:17:00	2019-12-29	1	1	Winter Solstice Festival	Large Artery Atherosclerosis Type	1	0	2023-03-16	1	0	0	0	0	0	0	0	0	0	0	0	0	0	110	76	92	17	98	36.7	3	3	1		0	0	7.1	0	0	0	0	0	0
580	Female	76	1	1	2019-12-28	1899-12-31 18:20:00	2019-12-28	1899-12-31 18:45:00	2020-01-21	24	2	Major Snow	Cerebral Infarction	1	0	2020-01-20	2	1	0	0	1	1	0	0	0	0	1	0	0	0	112	67	82	20	98	36.4	15	5		4	0	6		1	0	0	0	0	1
581	Female	65	2	2	2019-12-28	1899-12-31 20:00:00	2019-12-28	1899-12-31 22:20:00	2020-01-12	15	1	Winter Solstice Festival	Large Artery Atherosclerosis Type	1	115	2020-01-12	1	0	0	0	0	1	0	0	0	0	0	0	0	0	110	70	82	20	98	37	2	1	1		0	0		1	0	0	0	0	0
582	Male	72	1	1	2019-12-29	1899-12-31 18:30:00	2019-12-29	1899-12-31 21:58:00	2020-01-10	12	1	Winter Solstice Festival	Large Artery Atherosclerosis Type	1	0	2020-08-06	1	0	0	0	0	0	0	0	0	0	0	0	0	0	178	94	100	18	97	36.8	2	2	1		0	0	9	0	0	0	0	1	0
583	Female	83	2	1	2019-12-30	1899-12-31 09:00:00	2019-12-30	1899-12-31 11:45:00	2020-01-08	9	1	Winter Solstice Festival	Large Artery Atherosclerosis Type	1	0	2020-01-13	1	1	0	0	0	0	0	0	0	0	0	0	0	0	132	80	84	16	100	36.6	12	5	1	3	0	0	7.7	1	0	0	0	0	0
584	Male	61	1	1	2019-12-31	1899-12-31 09:00:00	2019-12-31	1899-12-31 09:58:00	2020-05-23	144	1	Winter Solstice Festival	Intracerebral Hemorrhage	2	5	2022-12-06	1	1	0	0	0	0	0	0	0	0	0	1	0	0	191	68	89	22	98	37.8	28				0	0	8.2	0	0	0	0	0	0
585	Male	53	2	1	2020-05-30	1899-12-31 20:05:00	2020-05-30	1899-12-31 22:58:00	2020-06-10	11	1	Grain Buds	Cerebral Infarction	1	0	2022-11-25	1	1	1	0	0	0	0	0	0	0	0	0	0	0	108	66	85	19	100	36	10	4	2	3	0	0	15.3	1	0	0	1	0	0
586	Male	75	1	1	2020-08-27	1899-12-31 06:00:00	2020-08-27	1899-12-31 18:28:00	2020-09-05	9	1	End of Hea	Large Artery Atherosclerosis Type	1	0	2022-12-20	1	0	0	0	0	0	0	0	0	0	0	0	1	1	182	96	95	20	98	36.5	2	2	2	2	0	0	6.5	1	0	1	0	1	0
587	Male	78	1	2	2020-10-24	1899-12-31 16:30:00	2020-10-24	1899-12-31 16:57:00	2020-10-30	6	1	Frost's Descent	Cerebral Infarction	1	0	2022-06-21	1	1	0	0	0	1	0	0	0	0	0	0	0	0	150	82	79	18	95	36.8	27	5		4	0	0	6.1	1	0	0	0	0	0
588	Male	62	1	2	2019-11-24	1899-12-31 11:20:00	2019-11-24	1899-12-31 14:43:00	2019-12-01	7	1	Light Snow	Cerebral Infarction	1	0	2020-02-09	1	1	0	0	0	1	0	0	0	0	0	0	0	0	134	93	80	20	98	37	5	4	1		0	0	8.1	1	0	0	0	0	0
589	Female	79	1	2	2020-05-13	1899-12-31 10:30:00	2020-05-13	1899-12-31 14:02:00	2020-05-28	15	1	Beginning of Summer	Cardioembolic Type	1	0	2021-01-11	1	1	1	1	1	1	0	0	0	0	0	0	0	0	137	79	120	23	99	36.5	6	4	2		0	7	17.2	1	0	0	0	1	0
590	Female	72	2	1	2021-07-29	1899-12-31 08:00:00	2021-07-29	1899-12-31 12:05:00	2021-08-16	18	1	Great Heat	Large Artery Atherosclerosis Type	1	0	2023-03-23	1	1	1	0	0	1	0	0	0	0	0	0	0	0	150	97	124	24	99	37.5	11	4	4	4	0	0	7.2	1	1	1	0	1	0
591	Female	58	1	1	2021-08-08	1899-12-31 22:00:00	2021-08-09	1899-12-31 13:16:00	2021-08-13	4	1	Start of autumn	Cerebral Infarction	1	0	2021-08-13	1	1	1	1	0	0	0	0	0	0	0	0	0	0	110	76	91	20	97	36.3	14	4	4	2	0	0	7.8	0	0	0	0	0	1
592	Male	49	2	1	2021-08-10	1899-12-31 18:00:00	2021-08-11	1900-01-11	2021-08-26	15	1	Start of autumn	Large Artery Atherosclerosis Type	1	0	2022-05-11	1	0	0	0	0	0	0	0	0	0	0	0	1	0	111	68	72	18	100	36.6	12	4	3		0	0	7.5	0	1	1	0	0	0
593	Male	66	1	1	2021-08-11	1899-12-31 18:00:00	2021-08-11	1899-12-31 23:30:00	2021-08-12	1	1	Start of autumn	Large Artery Atherosclerosis Type	1	0	2021-08-12	1	0	0	1	0	0	0	0	0	0	0	0	0	0	128	80	90	20	99	36.7	11	4	3	1	0	0	12.3	0	0	0	0	0	0
594	Male	67	2	2	2021-08-12	1899-12-31 14:30:00	2021-08-12	1899-12-31 21:08:00	2021-08-19	7	1	Start of autumn	Cerebral Infarction	1	0	2022-01-19	1	1	0	0	0	1	0	0	1	0	0	0	0	0	188	104	74	20	99	36.2	1	1	1	3	0	0	9.6	1	0	1	0	1	0
595	Male	55	1	2	2021-08-13	1899-12-31 19:00:00	2021-08-14	1899-12-31 11:21:00	2021-09-04	21	1	Start of autumn	Large Artery Atherosclerosis Type	1	0	2021-09-04	1	1	0	0	0	1	0	0	0	0	0	0	0	0	198	96	104	25	95	38.8	25	5	5		0	0	8.8	0	1	0	0	0	0
596	Male	47	2	1	2021-08-15	1899-12-31 10:00:00	2021-08-15	1899-12-31 12:39:00	2021-08-21	6	1	Start of autumn	Cerebral Infarction	1	0	2022-04-04	1	1	0	0	0	0	0	0	0	0	0	0	0	0	128	95	70	19	98	36.7	3	2	1	2	0	0	6.2	0	0	0	1	0	0
597	Male	40	2	1	2021-08-20	1899-12-31 10:20:00	2021-08-20	1899-12-31 11:16:00	2021-08-27	7	1	Start of autumn	Small Artery Occlusion Type	1	0	2022-03-08	1	1	0	0	0	0	0	0	0	0	0	0	0	0	180	109	82	24	100	36.7	3	4	1	2	0	0	7.3	1	0	0	0	0	0
598	Male	57	1	2	2021-08-22	8;15	2021-08-22	1899-12-31 10:36:00	2021-08-28	6	1	Start of autumn	Large Artery Atherosclerosis Type	1	0	2022-11-10	1	1	1	0	0	1	0	0	0	0	0	1	0	0	108	63	72	20	100	36.9	0	1	1	4	0	0	6.1	1	0	0	0	1	0
599	Male	53	1	1	2021-08-22	1899-12-31 16:00:00	2021-08-22	1899-12-31 21:38:00	2021-09-03	12	1	Start of autumn	Large Artery Atherosclerosis Type	1	0	2021-09-03	1	0	0	0	0	0	0	0	0	0	0	0	1	0	153	90	85	20	99	36.6	11	4	1	1	0	0	6.8	0	0	0	0	0	1
600	Male	59	1	1	2021-08-22	1899-12-31 22:30:00	2021-08-23	1899-12-31 09:40:00	2021-08-30	7	1	Start of autumn	Large Artery Atherosclerosis Type	1	0	2022-06-27	1	1	1	0	0	0	0	0	0	0	0	0	0	0	208	90	81	16	97	36.3	11	4	1	2	0	0	9.8	1	0	0	0	0	0
601	Male	74	2	1	2021-08-23	1899-12-31 03:00:00	2021-08-23	1899-12-31 13:55:00	2021-08-28	5	1	End of Hea	TIA	3	0	2021-08-28	1	0	0	0	0	0	0	0	0	0	0	0	0	0	183	88	63	20	100	36.1	0	1	2	2	0	0	4.9	1	0	0	0	0	0
602	Male	32	1	1	2021-08-27	1899-12-31 19:00:00	2021-08-27	1899-12-31 19:29:00	2021-09-03	7	1	End of Hea	Unclear Cause	1	0	2023-01-20	1	0	0	0	0	0	0	0	0	0	0	1	0	0	154	80	76	20	96	36.2	12	4	1	0	0	0	5.6	0	0	0	0	0	1
603	Female	81	2	1	2021-08-28	1899-12-31 19:00:00	2021-08-28	1899-12-31 21:40:00	2021-09-05	8	1	End of Hea	Cerebral Infarction	1	0	2023-02-28	1	1	0	0	0	0	0	0	0	0	0	0	0	0	193	93	68	21	98	36.2	6	3	1	4	0	0	9.8	1	0	0	0	0	0
604	Female	82	1	1	2021-08-28	1899-12-31 23:00:00	2021-08-29	1899-12-31 07:35:00	2021-09-08	10	1	End of Hea	Large Artery Atherosclerosis Type	1	0	2022-03-15	1	1	0	0	0	0	0	0	0	0	0	0	0	0	171	81	67	20	98	36.7	2	4	1	3	0	0	6.8	1	0	0	0	0	0
605	Male	49	1	1	2021-08-29	1899-12-31 12:30:00	2021-08-29	1899-12-31 13:03:00	2021-08-30	1	1	End of Hea	TIA	3	0	2021-08-29	1	1	0	0	0	0	0	0	0	0	0	0	0	0	164	99	72	17	98	36.2					0	0	8.3
606	Female	81	1	1	2021-08-31	1899-12-31 07:00:00	2021-08-31	1899-12-31 07:28:00	2021-09-15	15	1	End of Hea	Cerebral Infarction	1	0	2021-09-15	1	0	0	0	0	1	0	0	0	0	0	0	0	0	147	83	64	18	98	36.6	5	4	1	3	0	0	8.8	1	0	0	0	1	0
607	Male	90	1	1	2021-08-31	1899-12-31 16:35:00	2021-08-31	1899-12-31 17:13:00	2021-10-13	43	1	End of Hea	Intracerebral Hemorrhage	2	0	2021-09-24	1	1	0	0	0	1	0	0	0	0	0	0	0	0	175	96	79	20	99	36.4	17	4	3	3	0	0	6.5	0	0	0	0	0	0
608	Male	61	2	2	2021-09-01	1899-12-31 20:30:00	2021-09-01	1899-12-31 21:27:00	2021-09-09	8	1	End of Hea	Large Artery Atherosclerosis Type	1	0	2023-04-03	1	0	1	0	0	1	0	0	0	0	0	0	0	0	147	84	74	16	98	36.6	6	4	1	2	0	0	4.8	0	1	1	0	0	0
609	Female	48	1	1	2021-09-03	1899-12-31 18:00:00	2021-09-03	1899-12-31 23:50:00	2021-09-09	6	1	End of Hea	Large Artery Atherosclerosis Type	1	0	3023-03-31	1	1	0	0	0	0	0	0	0	0	0	0	0	0	202	108	85	20	100	36.7	1	3	1	1	0	0	6.1	0	0	1	0	1	0
610	Male	51	2	1	2021-09-03	1899-12-31 16:30:00	2021-09-03	1899-12-31 23:02:00	2021-09-17	14	1	End of Hea	Cerebral Infarction	1	0	2021-09-17	1	1	0	0	0	0	0	0	0	0	0	0	0	0	163	118	98	16	99	36.6	13	5	2	3	0	0	8.2	1	1	0	0	0	0
611	Female	56	1	1	2021-09-04	1899-12-31 18:00:00	2021-09-05	1899-12-31 02:18:00	2021-09-12	7	1	End of Hea	Large Artery Atherosclerosis Type	1	0	2021-10-22	1	0	0	0	0	1	0	0	0	0	0	0	0	0	157	89	76	21	98	36.4	1	2	1	2	0	0	8.4	1	1	1	0	1	0
612	Female	87	2	1	2021-09-05	1899-12-31 07:57:00	2021-09-05	1899-12-31 08:34:00	2021-09-16	11	1	End of Hea	Cardioembolic Type	1	0	2021-09-30	1	1	0	1	0	0	0	0	0	0	0	0	0	0	138	72	60	16	99	36.1	17	5	4	4	0	0	6.2	0	0	0	0	0	0
613	Male	47	2	1	2021-09-06	1899-12-31 01:10:00	2021-09-06	1899-12-31 07:18:00	2021-09-09	3	1	End of Hea	Cerebral Infarction	1	0	2022-11-27	1	0	0	0	0	0	0	0	0	0	0	0	0	0	166	123	86	14	99	36.7	1	1	1	2	0	0	10.3	0	0	1	0	0	0
614	Female	60	1	2	2021-09-06	1899-12-31 13:00:00	2021-09-06	1899-12-31 13:28:00	2021-09-28	22	1	End of Hea	Cerebral Infarction	1	0	2023-02-23	2	0	0	0	1	1	1	0	1	0	0	1	0	0	120	63	60	16	98	36.4	14	4	1		6	4	6.5	1	0	0	0	1	0
615	Male	84	1	1	2021-09-08	1899-12-31 13:00:00	2021-09-08	1899-12-31 17:48:00	2021-09-19	11	1	White dew	Large Artery Atherosclerosis Type	1	0	2021-09-19	1	1	0	0	0	0	0	0	0	0	0	0	1	1	178	86	70	17	100	35.7	18	5	4	4	0	0	7.4	1	1	0	0	0	0
616	Female	82	1	1	2021-09-08	1899-12-31 18:30:00	2021-09-09	1899-12-31 08:32:00	2021-09-18	9	1	White dew	Cerebral Infarction	1	0	2021-09-30	1	1	1	1	0	1	0	0	0	0	0	0	0	0	214	106	100	20	95	36.4	6	5	5	6	0	0	25.3	1	0	0	0	0	0
617	Male	74	1	1	2021-09-09	1899-12-31 16:15:00	2021-09-09	1899-12-31 17:39:00	2021-09-16	7	1	White dew	Large Artery Atherosclerosis Type	1	0	2021-10-20	1	0	0	0	0	0	0	0	0	0	0	0	0	0	157	84	66	22	99	36.7	4	2	2	2	0	0	8.2	0	0	1	0	1	0
618	Male	84	1	2	2021-09-11	1899-12-31 02:00:00	2021-09-12	1899-12-31 13:15:00	2021-09-19	7	1	White dew	Cerebral Infarction	1	0	2023-03-19	1	1	0	0	0	1	0	0	0	0	0	0	0	0	142	86	71	21	98	36.7	5	3	3	4	0	0	6.9	1	0	1	0	1	0
619	Male	65	1	1	2021-09-13	1899-12-31 06:30:00	2021-09-13	1899-12-31 08:40:00	2021-09-19	6	1	White dew	Large Artery Atherosclerosis Type	1	0	2022-06-18	1	0	1	0	0	0	0	0	0	0	0	0	0	0	153	78	78	20	100	36.5	2	2	1	3	0	0	19.7	0	0	1	0	0	0
620	Male	56	1	1	2021-09-16	1899-12-31 18:00:00	2021-09-16	1899-12-31 20:16:00	2021-09-24	8	1	White dew	Cerebral Infarction	1	0	2022-03-22	1	1	0	0	0	0	0	0	0	0	0	0	0	0	183	110	74	15	100	36.7	0	0	1	2	0	0	7.1	0	0	1	0	1	0
621	Male	50	2	1	2021-09-18	1899-12-31 23:30:00	2021-09-19	1899-12-31 08:10:00	2021-10-01	12	2	White dew	Cerebral Infarction	1	0	2021-09-27	2	1	0	0	1	0	0	0	0	0	0	1	0	0	145	73	107	20	98		13	4	2		0	0	6.34	0	1	0	0	0	0
622	Female	86	1	1	2021-09-18	1899-12-31 20:00:00	2021-09-19	1899-12-31 07:50:00	2021-09-25	6	1	White dew	Large Artery Atherosclerosis Type	1	0	2021-09-25	1	1	0	0	0	0	0	0	0	0	0	0	0	0	126	64	93	21	99	37.1	10	4	1	2	0	0	7	1	0	0	1	1	0
623	Male	60	1	1	2021-09-19	1899-12-31 02:00:00	2021-09-19	1899-12-31 08:43:00	2021-09-25	6	1	White dew	Large Artery Atherosclerosis Type	1	0	2022-01-17	1	0	0	0	0	0	0	0	0	0	0	0	1	0	205	108	68	20	99	36.7	3	2	1	1	0	0	5.9	0	0	1	0	1	0
624	Male	74	1	1	2021-09-20	1899-12-31 08:10:00	2021-09-20	1899-12-31 11:03:00	2021-09-26	6	1	White dew	Cerebral Infarction	1	0	2022-06-09	1	1	1	1	0	0	0	0	0	0	0	0	0	0	160	91	76	20	98	36.7	8	4	3	5	0	0	12	0	0	0	0	0	0
625	Male	66	2	1	2021-09-20	1899-12-31 08:00:00	2021-09-20	1899-12-31 16:30:00	2021-09-30	10	1	White dew	Large Artery Atherosclerosis Type	1	0	2021-09-30	1	1	0	0	0	1	0	0	0	0	0	0	0	0	203	116	69	18	99	36.3	12	4	3	4	0	0	7.5	1	0	0	0	0	1
626	Male	53	1	1	2021-09-20	1899-12-31 20:19:00	2021-09-20	1899-12-31 20:54:00	2021-10-23	33	2	White dew	Cerebral Infarction	1	0	2021-10-23	2	1	0	0	0	1	0	0	0	0	0	0	1	0	170	110	85	24	99	36.8	2	2	1	3	0	0	14.5	0	0	0	0	0	0
627	Male	77	2	1	2021-09-24	1899-12-31 15:30:00	2021-09-24	1899-12-31 16:14:00	2021-10-15	21	1	Autumn equinox	Large Artery Atherosclerosis Type	1	0	2021-10-15	1	1	0	0	0	1	0	0	0	0	0	0	0	0	192	104	85	20	98	36.8	12	4	3	4	0	4	4.7	0	0	0	0	0	0
628	Female	43	2	1	2021-09-26	1899-12-31 06:00:00	2021-09-26	1899-12-31 15:50:00	2021-10-06	10	1	Autumn equinox	Cardioembolic Type	1	0	2021-10-10	1	0	0	0	0	0	0	0	0	0	0	1	0	0	117	79	62	20	99	37	17	5	2		0	0	8.3	0	0	0	0	0	0
629	Male	69	2	1	2021-09-26	1899-12-31 11:00:00	2021-09-26	1899-12-31 19:53:00	2021-10-05	9	1	Autumn equinox	Cardioembolic Type	1	0	2022-06-17	1	1	0	0	0	0	1	0	0	0	0	0	0	0	138	78	111	25	98	36.5	4	3	1	3	0	0	6.7	0	1	0	0	1	0
630	Male	71	1	1	2021-09-28	1899-12-31 22:00:00	2021-09-29	1899-12-31 23:34:00	2021-10-14	15	1	Autumn equinox	Large Artery Atherosclerosis Type	1	0	2021-10-15	1	1	0	0	0	0	0	0	0	0	0	0	1	0	192	80	90	24	99	36.7	10	4	2	3	0	0	5.5	1	0	0	0	1	0
631	Male	91	2	1	2021-09-30	1899-12-31 13:00:00	2021-09-30	1899-12-31 20:00:00	2021-10-28	28	1	Autumn equinox	Cerebral Infarction	1	0	2023-04-07	1	1	0	0	0	0	0	0	0	0	0	0	0	0	177	94	73	20	98	36.3	6	4	1	4	0	0	5.8	1	0	1	0	0	0
632	Male	56	1	1	2021-10-02	1899-12-31 20:40:00	2021-10-03	1899-12-31 01:30:00	2021-10-09	6	1	Autumn equinox	Large Artery Atherosclerosis Type	1	0	2021-10-09	1	0	0	0	0	0	0	0	0	0	0	0	0	0	128	78	75	20	98	36.4	12	4	1	0	0	0	7.2	0	1	0	0	1	0
633	Female	64	2	1	2021-10-05	1899-12-31 09:56:00	2021-10-05	1899-12-31 12:26:00	2021-10-13	8	1	Autumn equinox	Cerebral Infarction	1	0	2022-06-06	1	1	0	0	0	0	1	0	0	1	0	0	0	0	170	105	82	26	97	36.2	5	3	1	1	0	0	7.1	0	0	1	0	0	0
634	Male	76	1	1	2021-10-05	1899-12-31 08:00:00	2021-10-05	1899-12-31 11:35:00	2021-10-11	6	1	Autumn equinox	Cerebral Infarction	1	0	2021-10-11	1	1	0	1	0	0	0	0	0	0	0	0	0	0	153	93	93	20	99	36.5	3	2	1	3	0	0	12.4	1	0	1	0	1	0
635	Male	57	1	1	2021-10-09	1899-12-31 12:00:00	2021-10-11	1899-12-31 18:00:00	2021-10-22	11	1	Cold dew	Cerebral Infarction	1	0	2021-10-22	1	0	0	0	0	0	0	0	0	0	0	0	1	1	210	80	90	24	98	36.8	6	4	2	1	0	0	7.1	1	0	0	0	1	0
636	Male	47	1	1	2021-10-14	1899-12-31 07:00:00	2021-10-14	1899-12-31 12:04:00	2021-10-22	8	2	Cold dew	Cardioembolic Type	1	0	2021-10-21	2	0	0	0	0	0	0	0	0	0	0	0	0	0	144	83	88	19	99	39.4	30	5		1	0	2	7.2	0	0	0	0	0	0
637	Male	66	1	2	2021-10-17	1899-12-31 03:00:00	2021-10-17	1899-12-31 07:31:00	2021-10-23	6	1	Cold dew	Large Artery Atherosclerosis Type	1	0	2021-10-23	1	1	1	0	0	1	0	0	0	0	0	0	0	0	153	95	68	22	98	36.7	3	3	1	4	0	0	11	1	0	0	0	1	0
638	Male	92	1	1	2021-10-17	1899-12-31 19:20:00	2021-10-17	1899-12-31 08:02:00	2021-10-23	6	1	Cold dew	Cerebral Infarction	1	0	2022-05-18	1	1	0	0	1	1	0	0	0	0	0	0	0	0	154	77	130	25	99	36.7	3	1	1	4	4	0	11.4	1	0	0	0	0	0
639	Male	50	1	1	2021-10-19	1899-12-31 02:30:00	2021-10-19	1899-12-31 03:15:00	2021-11-17	29	1	Cold dew	Cerebral Infarction	1	0	2022-08-27	1	1	0	0	0	0	0	0	0	0	0	0	0	0	166	108	74	16	98	36.4	15	5	3	1	0	0	6.9	0	0	0	0	1	0
640	Female	44	1	1	2021-10-21	1899-12-31 12:40:00	2021-10-21	1899-12-31 13:10:00	2021-10-27	6	1	Cold dew	Intracerebral Hemorrhage	2	0	2021-11-30	2	1	0	0	0	0	0	0	0	0	0	0	0	0	230	151	78	16	90	36.5	38				0	0	6.5	0	0	0	0	0	0
641	Male	72	1	1	2021-10-23	1899-12-31 08:00:00	2021-10-23	1899-12-31 13:00:00	2021-11-24	32	1	Frost's Descent	Large Artery Atherosclerosis Type	1	0	2021-11-24	1	0	0	0	0	1	0	0	0	0	0	0	0	0	192	104	73	13	100	36.7	7	4	2	3	0	0	6.5	1	1	0	1	0	0
642	Male	71	1	2	2021-10-25	1899-12-31 15:00:00	2021-10-25	1899-12-31 16:58:00	2021-11-02	8	1	Frost's Descent	TIA	3	0	2021-11-02	1	1	0	0	0	1	0	0	0	0	0	0	0	0	160	109	116	20	99	36.4	3	1	1	4	0	0	6.9	1	0	1	0	1	0
643	Female	70	2	1	2021-10-25	1899-12-31 12:00:00	2021-10-25	1899-12-31 21:55:00	2021-11-09	15	1	Frost's Descent	Large Artery Atherosclerosis Type	1	0	2023-03-05	1	1	0	0	0	1	0	0	0	0	0	0	0	0	171	79	76	20	100	36.8	9	4	2	3	0	0	6.5	1	0	1	0	1	0
644	Male	53	1	1	2021-10-25	1899-12-31 13:00:00	2021-10-25	1899-12-31 19:36:00	2021-11-02	8	1	Frost's Descent	TIA	3	0	2022-01-07	1	0	1	0	0	0	0	0	0	0	0	0	1	1	116	79	84	20	100	36.3	1	1	1	2	5	0	18.9	0	0	1	0	0	0
645	Female	87	1	1	2021-10-26	1899-12-31 09:21:00	2021-10-26	1899-12-31 13:25:00	2021-11-09	14	1	Frost's Descent	Cerebral Infarction	1	0	2022-01-14	1	0	0	0	0	0	0	0	0	0	0	0	0	0	149	94	101	25	99	36.5	6	5	4	2	0	8	8.7	0	0	0	0	0	0
646	Male	38	2	1	2021-10-27	1899-12-31 16:00:00	2021-10-28	1899-12-31 01:55:00	2021-11-03	6	1	Frost's Descent	Cerebral Infarction	1	0	2021-11-03	1	1	0	0	0	0	0	0	0	0	0	0	1	1	164	112	112	16	99	36.6	2				0	0	6.7	0	0	0	0	0	0
647	Male	56	2	1	2021-10-28	1899-12-31 09:00:00	2021-10-28	1899-12-31 19:18:00	2021-11-05	8	1	Frost's Descent	Large Artery Atherosclerosis Type	1	0	2022-09-24	1	0	0	0	0	0	0	0	0	0	0	0	1	0	155	99	76	21	99	36.5	0	1	1	1	0	0	8.5	1	0	0	0	1	0
648	Male	57	1	2	2021-10-28	1899-12-31 20:00:00	2021-10-29	1899-12-31 07:58:00	2021-10-31	2	2	Frost's Descent	Intracerebral Hemorrhage	2	0	2021-11-03	2	1	0	0	0	1	0	0	0	0	0	0	0	0	125	81	107	25	99	37	6	3	2		0	0	8.6	1	0	1	1	0	0
649	Female	65	2	1	2021-10-30	1899-12-31 09:30:00	2021-10-30	1899-12-31 10:07:00	2021-11-19	20	1	Frost's Descent	Intracerebral Hemorrhage	2	0	2022-06-14	1	1	0	0	0	0	1	0	0	0	0	0	0	0	176	101	80	20	98	36.5					0	0	6.2	0	0	0	0	0	0
650	Female	71	2	1	2021-10-30	1899-12-31 09:00:00	2021-10-30	1899-12-31 16:58:00	2021-11-10	11	1	Frost's Descent	Large Artery Atherosclerosis Type	1	0	2021-11-10	1	0	1	0	0	1	0	0	0	0	0	0	0	0	157	88	15	100	37	37	2	2	1	4	0	0	21.1	1	0	1	0	1	0
651	Female	59	1	1	2021-10-31	1899-12-31	2021-10-31	1899-12-31 10:10:00	2021-11-19	19	1	Frost's Descent	Cerebral Infarction	1	0	2021-11-19	1	1	0	1	0	0	0	0	0	0	0	0	0	0	165	107	100	18	99	36.3	16	5	5	2	0	0	7	0	1	0	0	0	0
652	Male	71	1	1	2021-11-01	1899-12-31 14:00:00	2021-11-01	1899-12-31 16:25:00	2021-11-08	7	1	Frost's Descent	Large Artery Atherosclerosis Type	1	0	2022-05-27	1	1	0	0	0	1	0	0	0	0	0	0	0	0	169	97	82	18	100	36.5	2	3	1	4	0	0	17.8	1	0	0	0	0	0
653	Female	46	1	1	2021-11-03	1899-12-31 09:20:00	2021-11-03	1899-12-31 22:58:00	2021-11-09	6	1	Frost's Descent	Small Artery Occlusion Type	1	0	2022-05-09	1	1	0	0	0	1	0	0	0	0	0	0	0	0	192	93	89	21	98	36.3	2	3	1	2	0	0	7.4	1	0	0	0	0	0
654	Male	71	2	1	2021-11-03	1899-12-31 09:20:00	2021-11-03	1899-12-31 10:21:00	2021-11-18	15	1	Frost's Descent	Cerebral Infarction	1	0	2023-01-17	1	1	1	0	1	0	0	0	0	0	0	0	0	0	160	108	112	20	99	36.4	17	5	2	3	0	6	10.9	1	1	0	0	0	0
655	Male	83	1	1	2021-11-06	1899-12-31 10:30:00	2021-11-06	1899-12-31 12:30:00	2021-11-12	6	1	Frost's Descent	Cerebral Infarction	1	0	2022-12-14	2	1	0	0	0	1	0	0	1	0	1	0	0	0	123	54	68	20	95	36.9	2	3	1	5	0	0	5.8	0	0	1	1	1	1
656	Male	59	1	1	2021-11-07	1899-12-31 10:00:00	2021-11-07	1899-12-31 16:24:00	2021-11-13	6	1	Start of winter	Large Artery Atherosclerosis Type	1	0	2021-11-13	1	1	0	0	0	0	0	0	0	0	0	0	0	0	173	92	79	20	98	36.3	1	2	1	2	0	0	13.2	1	0	0	0	0	0
657	Male	55	1	1	2021-11-08	1899-12-31 21:00:00	2021-11-09	1899-12-31 00:26:00	2021-11-17	8	1	Start of winter	Small Artery Occlusion Type	1	0	2023-04-12	1	1	0	0	0	0	0	0	0	0	0	0	1	0	241	139	70	18	96	36.7	1	2	1	2	0	0	11	1	0	0	0	1	0
658	Male	49	1	1	2021-11-16	1899-12-31 20:00:00	2021-11-17	1899-12-31 10:04:00	2021-11-20	3	1	Start of winter	Cerebral Infarction	1	0	2023-03-10	1	0	0	0	0	0	0	0	0	0	0	0	0	0	153	73	70	15	98		4	3	1	0	0	0	6.1	0	0	0	0	1	0
659	Male	77	1	1	2021-11-17	1899-12-31 00:10:00	2021-11-17	1899-12-31 01:17:00	2021-11-20	3	1	Start of winter	TIA	3	0	2022-07-27	1	1	0	0	0	0	0	0	0	0	0	0	0	0	166	107	79	19	97	36.2				7	0	6	5.4	0	0	1	0	0	0
660	Female	62	2	1	2021-11-17	1899-12-31 17:00:00	2021-11-17	1899-12-31 18:05:00	2021-11-20	3	1	Start of winter	Intracerebral Hemorrhage	2	21	2023-03-18	1	1	0	0	0	0	0	0	0	0	0	0	0	0	218	119	79	19	88	36.3					0	0	7.9	0	0	0	1	0	0
661	Male	67	1	1	2021-11-19	1899-12-31 12:00:00	2021-11-19	1899-12-31 14:33:00	2021-11-23	4	1	Start of winter	TIA	3	0	2021-12-01	1	0	0	0	0	0	0	0	0	0	0	0	0	0	140	86	66	14	100	36.3				2	0	0	6.5	1	0	0	0	1	0
662	Male	48	1	2	2021-11-21	1899-12-31 03:00:00	2021-11-21	1899-12-31 16:00:00	2021-11-29	8	1	Start of winter	Large Artery Atherosclerosis Type	1	0	2023-04-08	1	1	1	0	0	0	0	0	0	0	0	1	0	0	163	113	71	21	98	36.5	0	1	1	3	0	0	11.9	1	0	1	0	0	0
663	Male	64	2	1	2021-11-24	1899-12-31 06:00:00	2021-11-24	1899-12-31 19:00:00	2021-12-07	13	1	Light Snow	Large Artery Atherosclerosis Type	1	0	2023-04-02	1	1	1	0	0	0	0	0	0	0	0	0	0	0	166	85	68	18	97	36.5	8	3	2	2	0	0	16.4	1	1	0	1	1	0
664	Female	69	2	2	2021-11-25	1899-12-31 03:35:00	2021-11-25	1899-12-31 08:20:00	2021-11-30	5	2	Light Snow	Large Artery Atherosclerosis Type	1	0	2021-12-22	2	0	0	0	0	1	0	0	0	0	0	0	0	0	142	68	85	20	99	36.5	15	5	3		0	0	6.75	1	0	0	0	0	0
665	Male	61	1	1	2021-11-25	1899-12-31 21:00:00	2021-11-25	1899-12-31 22:46:00	2021-12-08	13	1	Light Snow	Cerebral Infarction	1	0	2022-10-17	1	0	0	0	0	0	0	0	0	0	0	0	1	1	148	93	78	20	99	36.6	10	4	1	1	5	0	9.4	1	0	0	0	1	0
666	Male	65	1	1	2021-11-25	1899-12-31 12:00:00	2021-11-25	1899-12-31 14:09:00	2021-12-04	9	1	Light Snow	Large Artery Atherosclerosis Type	1	0	2021-12-17	1	1	0	0	0	0	0	0	0	0	0	0	0	0	154	91	69	20	100	36.7	13	4	3	1	0	0	8.1	0	1	1	0	0	0
667	Male	75	1	1	2021-11-25	1899-12-31 17:00:00	2021-11-26	1899-12-31 14:15:00	2021-12-04	8	1	Light Snow	Large Artery Atherosclerosis Type	1	0	2022-06-21	1	0	0	0	1	1	1	0	0	0	0	0	0	0	122	75	102	19	99	36.6	8	4	1	3	0	4	11.6	1	0	0	0	1	0
668	Female	60	2	1	2021-11-26	1899-12-31 15:40:00	2021-11-26	1899-12-31 16:49:00	2021-12-05	9	1	Light Snow	Cerebral Infarction	1	0	2021-12-05	1	0	0	0	0	1	0	0	0	0	0	0	0	0	176	117	51	20	98	36.3	8	5	2	2	0	0	5.4	1	0	1	0	0	0
669	Male	65	1	1	2021-11-28	1899-12-31 20:30:00	2021-11-28	1899-12-31 21:49:00	2021-12-04	6	1	Light Snow	Cardioembolic Type	1	0	2022-07-18	1	0	0	0	0	0	0	0	0	0	0	0	1	0	128	75	138	22	99	36.5	1	2	1	1	0	2	7.5	1	0	0	1	0	0
670	Male	73	2	1	2021-11-29	1899-12-31 10:00:00	2021-11-29	1899-12-31 15:38:00	2021-12-08	9	1	Light Snow	Large Artery Atherosclerosis Type	1	0	2021-12-08	1	1	0	0	0	1	0	0	0	0	0	0	0	0	173	123	100	18	98	36.4	7	4	2	3	0	0	4.7	1	0	0	0	1	0
671	Male	82	2	2	2021-11-30	1899-12-31 19:10:00	2021-11-30	1899-12-31 21:29:00	2021-12-06	6	1	Light Snow	Large Artery Atherosclerosis Type	1	0	2022-08-06	2	1	0	0	0	1	0	0	0	0	0	0	0	0	201	101	84	20	99	36.6	0	0	1	5	0	0	6.3	1	0	0	1	1	0
672	Male	66	1	2	2021-12-03	1899-12-31 19:30:00	2021-12-03	1899-12-31 21:00:00	2021-12-13	10	1	Light Snow	Cerebral Infarction	1	0	2021-12-13	1	1	1	0	1	1	0	0	0	0	0	0	0	0	150	113	120	20	98	36.3	30	5	5	5	0	5	10.7	1	0	0	0	0	1
673	Female	70	2	2	2021-12-06	1899-12-31 16:05:00	2021-12-06	1899-12-31 19:33:00	2021-12-14	8	1	Light Snow	Large Artery Atherosclerosis Type	1	0	2023-04-09	1	1	1	0	0	0	0	0	0	0	0	0	0	0	163	78	81	18	99	36.1	1	0	1	4	0	0	15.9	1	0	1	1	1	0
674	Male	57	2	1	2021-12-08	1899-12-31 01:58:00	2021-12-08	1899-12-31 03:10:00	2021-12-16	8	1	Major Snow	Large Artery Atherosclerosis Type	1	0	2023-03-14	1	0	0	0	0	0	0	0	0	0	0	1	1	0	167	88	55	15	97	36.5	0	0	1	1	0	0	8.6	1	0	0	0	0	0
675	Male	68	2	1	2021-12-08	1899-12-31 09:30:00	2021-12-08	1899-12-31 10:51:00	2021-12-15	7	1	Major Snow	Intracerebral Hemorrhage	2	40	2021-12-15	1	0	0	0	0	0	0	0	0	0	0	0	1	1	187	102	83	23	95	36.7					0	0	7.8	0	0	0	0	0	0
676	Male	58	2	1	2021-12-11	1899-12-31 14:01:00	2021-12-11	1899-12-31 16:42:00	2021-12-31	20	1	Major Snow	Intracerebral Hemorrhage	2	39	2023-03-02	1	0	0	0	0	0	0	0	0	0	0	0	1	1	157	97	69	19	99	36.7					0	0	6.4	0	0	0	0	0	0
677	Female	74	2	1	2021-12-11	1899-12-31 08:00:00	2021-12-12	1899-12-31 23:52:00	2021-12-20	8	1	Major Snow	Cerebral Infarction	1	0	2023-04-12	1	1	0	0	1	1	0	0	0	0	0	0	0	0	161	84	97	23	99	37.6	15	4	3	3	0	0	6	0	1	0	0	0	0
678	Male	55	1	1	2021-12-12	1899-12-31 09:00:00	2021-12-12	1899-12-31 15:28:00	2021-12-14	2	1	Major Snow	Large Artery Atherosclerosis Type	1	0	2022-08-31	1	1	0	0	0	0	0	0	0	0	0	0	1	0	209	126	123	16	98		1	2	1	2	0	0	5.7	1	0	1	0	0	0
679	Male	83	1	1	2021-12-12	1899-12-31 08:00:00	2021-12-12	1899-12-31 13:50:00	2021-12-20	8	1	Major Snow	Large Artery Atherosclerosis Type	1	0	2021-12-20	1	1	1	0	0	0	0	0	0	0	0	0	1	0	147	78	87	20	99	36.5	0	3	1	4	0	0	22.1	1	0	0	0	0	0
680	Male	61	1	2	2021-12-13	1899-12-31 22:00:00	2021-12-14	1899-12-31 23:05:00	2021-12-19	5	1	Major Snow	Cerebral Infarction	1	0	2023-02-23	1	1	0	0	0	1	0	0	0	0	0	0	1	0	151	93	78	19	99	36.7	3	2	1	4	0	0	8.8	0	0	0	0	1	0
681	Female	77	1	1	2021-12-20	1899-12-31 07:30:00	2021-12-20	1899-12-31 08:14:00	2021-12-31	11	1	Major Snow	Cardioembolic Type	1	0	2023-03-11	1	0	0	0	1	0	0	0	0	0	0	0	0	0	105	80	84	20	99	36.5	20	5	5		0	0	9.2	0	0	0	0	0	1
682	Male	82	2	2	2021-12-20	1899-12-31 15:00:00	2021-12-20	1899-12-31 19:00:00	2021-12-28	8	1	Major Snow	Cerebral Infarction	1	0	2022-07-01	1	1	0	0	0	1	0	0	0	0	0	0	0	0	166	108	102	21	98	36.5	2	3	3	6	0	0	7.7	1	0	0	0	0	0
683	Female	64	2	2	2021-12-20	1899-12-31 18:20:00	2021-12-20	1899-12-31 18:40:00	2022-01-01	12	1	Major Snow	Cerebral Infarction	1	0	2023-04-09	1	0	0	0	0	1	0	0	0	0	0	0	0	0	173	93	80	20	97	36.8	1	1	1	2	0	0	8.4	0	0	1	0	1	0
684	Male	55	2	1	2021-12-21	1899-12-31 23:50:00	2021-12-22	1899-12-31 00:50:00	2021-12-25	3	2	Winter Solstice Festival	Cerebral Infarction	1	0	2021-12-25	2	1	0	0	0	0	0	0	0	0	0	0	1	1	110	90	57	17	100	36.7					0	0	7.3	0	0	0	0	0	1
685	Male	50	1	1	2021-12-22	1899-12-31 20:00:00	2021-12-23	1899-12-31 11:52:00	2022-01-04	12	1	Winter Solstice Festival	Intracerebral Hemorrhage	2	12	2022-10-24	1	1	0	0	0	0	0	0	0	0	0	1	0	1	180	113	86	20	100	36.5	8	4	4	1	0	0	8.3	0	0	1	0	0	0
686	Male	66	2	1	2021-12-26	1899-12-31 09:10:00	2021-12-26	1899-12-31 09:49:00	2021-12-29	3	1	Winter Solstice Festival	Intracerebral Hemorrhage	2	13	2021-12-29	1	0	0	0	0	0	0	0	0	0	0	0	0	0	130	65	63	19	97	36.5					0	0	6.5	0	0	0	0	0	0
687	Male	67	2	1	2021-12-27	1899-12-31 07:10:00	2021-12-27	1899-12-31 09:37:00	2021-12-31	4	1	Winter Solstice Festival	Large Artery Atherosclerosis Type	1	0	2021-12-31	1	0	0	0	0	0	0	0	0	0	0	0	0	0	191	68	64	18	99	36.5	0	1	1	2	0	0	7.4	0	0	1	0	1	0
688	Female	74	1	1	2021-12-27	1899-12-31 20:35:00	2021-12-27	1899-12-31 21:16:00	2022-01-03	7	1	Winter Solstice Festival	Cerebral Infarction	1	0	2023-04-02	1	1	1	1	0	0	1	0	0	0	0	0	0	0	142	75	96	24	94	36.6	6	4	2	5	0	0	7.2	1	0	0	0	0	0
689	Male	68	1	1	2019-01-16	1899-12-31 13:00:00	2019-01-17	1899-12-31 07:50:00	2019-01-26	9	1	Slight cold	Cerebral Infarction	1	0	2022-01-19	1	1	1	0	0	1	0	0	0	0	0	0	0	0	136	86	108	20		36.2					0	0		1	0	0	0	0	0
690	Female	91	1	1	2019-03-07	1899-12-31 12:00:00	2019-03-08	1899-12-31 09:46:00	2019-03-15	7	1	Awakening of Insects	Acute cerebral infarction	1	0	2022-01-22	1	1	0	1	0	0	0	0	0	0	0	0	1	1	157	98	85	20		36.3					0	0		1	0	1	0	0	0
691	Female	53	1	1	2019-04-25	1899-12-31 07:00:00	2019-04-25	1899-12-31 09:48:00	2019-05-16	21	1	Grain Rain	Cerebral Infarction	1	0	2020-08-05	1	0	0	0	0	1	0	0	0	0	0	0	0	0	109	60	73	20		37.5					0	0		1	0	1	0	0	0
692	Male	64	1	1	2019-06-06	1899-12-31 10:00:00	2019-05-26	1899-12-31 18:01:00	2019-06-06	11	1	Grain in ear	Large Artery Atherosclerosis Type	1	0	2020-12-15	1	1	0	0	0	1	0	0	1	0	0	0	0	0	133	74	76	20		36.9	4				0	0		1	0	1	0	1	0
693	Male	77	1	1	2019-05-07	1899-12-31 16:00:00	2019-05-08	1899-12-31 10:00:00	2019-05-27	19	1	Beginning of Summer	Large Artery Atherosclerosis Type	1	0	2023-03-06	1	0	0	0	0	1	0	0	0	1	0	0	0	0	156	82	80	20		36.8	2				0	0		1	0	0	0	1	0
694	Male	67	1	1	2019-05-26	1899-12-31 10:00:00	2019-05-26	1899-12-31 18:00:00	2019-06-06	11	1	Grain Buds	Large Artery Atherosclerosis Type	1	0	2022-03-13	1	1	0	0	0	0	0	0	0	0	0	0	1	0	133	74	76	20		36.9	4				0	0		1	0	1	0	0	0
695	Female	58	2	1	2019-05-24	1899-12-31 08:00:00	2019-05-27	1899-12-31 11:26:00	2019-06-03	6	1	Grain Buds	Acute cerebral infarction	1	0	2021-03-11	1	1	0	1	0	1	0	0	0	0	0	1	0	0	174	89	72	20		36.6					0	0		1	0	1	0	0	0
696	Male	88	1	1	2019-06-11	1899-12-31 07:00:00	2019-06-11	1899-12-31 12:00:00	2019-06-17	6	1	Grain in ear	Large Artery Atherosclerosis Type	1	0	2021-04-07	1	0	1	0	0	1	0	0	0	0	0	1	0	0	112	72	68	20		36.4	6	1			0	0		1	0	0	0	0	0
697	Female	47	1	1	2019-07-18	1899-12-31 15:00:00	2019-07-19	1899-12-31 04:00:00	2019-08-09	21	1	Minor heat	Cardioembolic Type	1	0	2023-02-28	1	0	0	0	0	0	0	0	0	0	0	0	0	0	100	67	72	20		36.8	11	4	2		0	0		1	0	0	0	0	0
698	Female	65	1	1	2019-07-18	1899-12-31 10:00:00	2019-07-22	1899-12-31 08:00:00	2019-07-29	7	1	Minor heat	Lacunar Cerebral Infarction	1	0	2023-01-04	1	0	0	0	0	0	0	0	0	0	0	0	0	0	92	60	96	20		36.2	1	2	1		0	0		1	0	1	0	0	0
699	Male	62	1	2	2019-09-17	1899-12-31 08:00:00	2019-09-17	1899-12-31 13:10:00	2019-09-24	7	1	Cold dew	Cerebral Infarction	1	0	2020-12-15	1	0	0	0	0	0	0	0	0	0	0	0	0	0	150	76	105	20		36.7					0	0		1	0	0	1	0	0
700	Female	73	1	1	2019-10-01	1899-12-31 16:00:00	2019-10-07	1899-12-31 19:12:00	2019-10-14	7	1	Autumn equinox	Cerebral Infarction	1	0	2020-07-14	1	1	0	0	0	0	0	0	0	0	0	0	0	0	145	73	92	20		36.8	3	2	2		0	0		1	0	1	0	0	0
701	Female	79	1	2	2019-10-13	1899-12-31 18:30:00	2019-10-13	1899-12-31 20:16:00	2019-10-20	7	1	Cold dew	Acute cerebral infarction	1	0	2023-03-22	1	1	0	0	0	1	0	0	0	0	0	0	0	0	137	86	76	20		36.4	2	4	1		0	0		1	0	1	0	1	0
702	Female	76	1	2	2019-10-14	1899-12-31 14:20:00	2019-10-16	1899-12-31 13:45:00	2019-10-23	7	1	Cold dew	Acute cerebral infarction	1	0	2021-11-03	2	0	0	0	0	0	0	0	0	0	0	1	0	0	125	71	78	20		36.5					0	0		1	0	0	0	0	0
703	Male	57	1	1	2019-10-15	1899-12-31 14:00:00	2019-10-16	1899-12-31 16:37:00	2019-10-25	9	1	Cold dew	Large Artery Atherosclerosis Type	1	0	2021-10-17	1	1	0	0	0	0	0	0	0	0	0	0	1	0	163	107	109	20		37	3	1	2	1	0	0		1	0	1	1	0	0
704	Male	53	1	2	2019-11-07	1899-12-31 12:00:00	2019-11-07	1899-12-31 13:00:00	2019-11-16	9	1	Frost's Descent	Acute cerebral infarction	1	0	2020-03-26	1	1	0	0	0	1	0	0	0	0	0	0	0	0	132	78	81	21		36.1	3	2	1	3	0	0		1	0	1	0	0	0
705	Male	88	1	2	2019-11-20	1899-12-31 17:00:00	2019-11-20	1899-12-31 22:10:00	2019-11-26	6	1	Start of winter	Large Artery Atherosclerosis Type	1	0	2021-09-17	1	0	1	0	0	1	0	0	0	0	0	1	0	0	138	98	96	20		36.5	6	3	2		0	0		1	0	0	0	0	0
706	Male	67	1	1	2019-12-25	1899-12-31 04:00:00	2019-12-25	1899-12-31 16:51:00	2019-12-30	5	1	Winter Solstice Festival	Large Artery Atherosclerosis Type	1	0	2021-02-05	1	0	0	0	0	1	0	0	0	0	0	0	0	0	166	84	74	20		37	8	3	2	1	0	0		1	0	1	0	0	0
707	Female	79	2	1	2020-01-01	1899-12-31 12:00:00	2020-01-02	1899-12-31 16:49:00	2020-01-20	18	1	Winter Solstice Festival	Large Artery Atherosclerosis Type	1	0	2021-03-08	1	1	1	0	0	0	0	0	0	0	0	0	0	0	133	81	74	20		36.5	4	3	1		0	0		1	0	0	0	0	0
708	Female	83	2	1	2020-01-14	1899-12-31 11:00:00	2020-01-14	1899-12-31 15:00:00	2020-01-22	8	1	Slight cold	Cardioembolic Type	1	0	2020-09-28	1	0	0	0	1	0	0	0	0	0	0	0	0	0	112	62	84	20		36.5	4	4	1	3	0	5		1	0	0	0	0	0
709	Male	62	1	2	2020-01-14	1899-12-31 06:00:00	2020-01-14	1899-12-31 10:52:00	2020-02-02	19	1	Slight cold	Intracerebral Hemorrhage	2	15	2020-07-14	1	1	0	0	0	1	0	0	0	0	0	0	0	0	168	99	89	20		36.5	0	0	0	0	0	0	0	0	0	0	0	0	0
710	Male	55	1	1	2020-01-30	1899-12-31 10:00:00	2020-01-30	1899-12-31 18:00:00	2020-02-05	6	1	Major Cold	Acute cerebral infarction	1	0	2022-07-22	1	1	0	0	0	1	0	0	0	0	0	0	0	1	145	91	77	20		37.2	3	2	2		0	0		1	0	1	1	0	0
711	Male	75	2	1	2020-02-24	1899-12-31 08:00:00	2020-02-24	1899-12-31 14:44:00	2020-03-02	7	1	Rain Wate	Cardioembolic Type	1	0	2020-12-07	1	1	0	0	1	1	0	0	0	0	0	0	0	0	161	95	123	20		36	5	3	1		0	6		1	0	0	0	0	0
712	Male	37	1	2	2020-03-08	1899-12-31 14:00:00	2020-03-09	1899-12-31 12:18:00	2020-03-17	8	1	Awakening of Insects	Acute cerebral infarction	1	0	2022-04-07	1	1	0	0	0	0	0	0	0	0	0	0	0	0	197	114	78	20		36.7	6	4	1		0	0		1	0	0	0	0	0
713	Male	53	1	2	2020-03-07	1899-12-31 18:00:00	2020-03-08	1899-12-31 00:24:00	2020-03-13	5	1	Awakening of Insects	Large Artery Atherosclerosis Type	1	0	2022-05-29	2	0	0	0	0	0	0	0	0	0	0	0	0	0	130	90	102	20		37.6	4	2	1		0	0		1	0	0	0	0	0
714	Female	79	1	1	2020-03-26	1899-12-31 09:00:00	2020-03-27	1899-12-31 15:22:00	2020-04-04	7	1	Vernal Equinox	Large Artery Atherosclerosis Type	1	0	2022-07-01	1	1	1	0	0	1	0	0	0	0	0	0	0	0	119	73	74	20		36.6	3	2	1	6	0	8		1	0	0	0	1	0
715	Male	68	1	1	2020-04-10	1899-12-31 11:00:00	2020-04-10	1899-12-31 16:28:00	2020-04-17	7	1	Qingming	Cerebral Infarction	1	0	2023-01-11	1	1	0	1	0	0	0	0	0	0	0	0	0	0	117	81	85	20		36.7				3	0	0		1	0	0	0	1	0
716	Female	61	1	1	2020-04-20	1899-12-31 06:00:00	2020-04-26	1899-12-31 10:54:00	2020-05-01	5	1	Grain Rain	Acute cerebral infarction	1	0	2021-11-02	1	1	0	0	0	0	0	0	0	0	0	0	0	0	142	91	75	20		36.7	2	1	1		0	0		1	0	0	0	1	0
717	Male	68	1	1	2020-04-26	1899-12-31 11:00:00	2020-04-27	1899-12-31 11:01:00	2020-05-12	15	1	Grain Rain	Large Artery Atherosclerosis Type	1	0	2023-03-08	1	1	1	0	0	1	0	0	0	0	0	1	1	0	144	73	110	20		36.3	7	3	1	5	0	0		1	0	1	0	1	0
718	Male	79	1	2	2020-05-01	1899-12-31 12:00:00	2020-05-02	1899-12-31 14:07:00	2020-05-13	11	1	Grain Rain	Cerebral Infarction	1	0	2023-04-03	1	1	1	0	0	1	0	0	0	0	0	1	0	0	167	84	84	20		36.5	3	4	1	5	0	0		1	0	0	0	0	0
719	Female	62	2	2	2020-05-28	1899-12-31 10:30:00	2020-05-30	1899-12-31 12:54:00	2020-06-14	15	1	Grain Buds	Cerebral Infarction	1	0	2022-12-07	1	0	0	0	0	1	0	0	0	0	0	1	0	0	106	72	74	20		36.3					0	0		1	0	1	0	1	1
720	Male	68	1	2	2020-05-27	1899-12-31 13:00:00	2020-05-31	1899-12-31 08:38:00	2020-06-09	9	1	Grain Buds	Small Artery Occlusion Type	1	0	2021-07-19	1	0	1	0	0	0	0	0	0	0	0	0	0	0	97	73	75	20		36.3	3	2	1		0	0		1	0	0	0	0	1
721	Female	76	1	1	2020-06-01	1899-12-31 19:40:00	2020-06-01	1899-12-31 22:50:00	2020-06-11	10	1	Grain Buds	Small Artery Occlusion Type	1	0	2022-08-08	1	1	0	0	0	0	0	0	0	0	0	1	0	0	134	72	64	20		36.6	6	3	1	3	0	0		1	0	0	0	0	0
722	Female	83	1	2	2020-05-31	1899-12-31 12:40:00	2020-06-03	1899-12-31 16:42:00	2020-06-15	12	1	Grain Buds	Large Artery Atherosclerosis Type	1	0	2020-11-23	1	1	0	1	0	0	0	0	0	0	0	0	0	0	152	82	62	20		36.7	5	4	1	3	0	0		1	0	1	0	1	0
723	Male	62	1	2	2020-06-08	1899-12-31 16:00:00	2020-06-10	1899-12-31 15:22:00	2020-06-24	14	1	Grain in ear	Small Artery Occlusion Type	1	0	2020-12-09	1	1	1	0	0	1	1	0	0	0	0	0	0	0	138	80	78	20		36.6	4	4	4	4	0	0		1	0	0	0	0	0
724	Male	70	1	1	2020-06-05	1899-12-31 12:00:00	2020-06-13	1899-12-31 20:01:00	2020-06-25	12	1	Grain in ear	Large Artery Atherosclerosis Type	1	0	2022-11-09	1	1	1	0	0	1	1	0	0	0	0	0	0	0	133	73	77	20		36.9	5	3	1	4	0	0		1	0	1	0	1	0
725	Male	71	2	1	2020-06-18	1899-12-31 08:00:00	2020-06-19	1899-12-31 09:09:00	2020-06-29	10	1	Grain in ear	Large Artery Atherosclerosis Type	1	0	2020-12-22	1	1	0	1	0	1	0	0	0	0	0	0	0	0	145	75	82	20		36.5	3	1	1	4	0	0		1	0	1	0	0	0
726	Male	60	1	2	2020-07-08	1899-12-31 16:00:00	2020-07-15	1899-12-31 10:27:00	2020-07-22	7	1	Minor heat	Cardioembolic Type	1	0	2021-07-12	1	1	1	0	0	1	0	0	0	0	0	0	0	0	118	71	84	20		36.5	4	3	1	4	0	4		0	0	1	0	1	0
727	Male	80	2	2	2020-08-01	1899-12-31 06:30:00	2020-08-03	1899-12-31 11:43:00	2020-08-11	8	1	Great Heat	Cerebral Infarction	1	0	2023-01-11	1	0	0	0	0	1	0	0	0	0	0	0	0	0	151	84	97	21		36.6				4	0	0		1	0	0	0	0	0
728	Male	68	1	1	2020-09-01	1899-12-31 06:11:00	2020-09-01	1899-12-31 12:10:00	2020-09-10	9	1	End of Hea	Large Artery Atherosclerosis Type	1	0	2023-03-19	1	0	0	0	0	0	0	0	0	0	0	0	0	0	145	87	90	20		36	1	2	2	1	0	0		1	0	0	0	1	0
729	Male	77	1	2	2020-09-01	1899-12-31 16:00:00	2020-09-02	1899-12-31 17:46:00	2020-09-22	19	1	End of Hea	Large Artery Atherosclerosis Type	1	0	2021-11-12	2	1	0	0	1	1	0	0	0	0	0	0	0	0	132	72	62	20		36.6			1	5	0	5		1	0	1	0	0	0
730	Male	68	1	2	2020-09-10	1899-12-31 07:00:00	2020-09-10	1899-12-31 10:20:00	2020-09-19	9	1	White dew	Large Artery Atherosclerosis Type	1	0	2021-04-07	1	1	1	0	0	0	0	0	0	0	0	0	0	0	116	70	83	20		36.2	1	2	1	5	0	0		1	0	0	0	0	0
731	Female	74	2	1	2020-09-19	1899-12-31 14:00:00	2020-09-21	1899-12-31 18:55:00	2020-09-30	9	1	White dew	Large Artery Atherosclerosis Type	1	0	2021-04-09	1	1	0	0	0	1	0	0	0	0	0	0	0	0	176	77	78	20		36.3	2	2	3	3	0	0		1	1	1	0	0	0
732	Male	69	2	1	2020-10-11	1899-12-31 06:00:00	2020-10-14	1899-12-31 10:27:00	2020-10-23	9	1	Cold dew	Large Artery Atherosclerosis Type	1	0	2023-03-16	1	1	0	0	0	0	0	0	0	0	0	0	0	0	181	92	82	20		36.5	4	4	1	3	0	0		1	0	1	0	1	0
733	Female	63	1	2	2020-11-25	1899-12-31 11:00:00	2020-10-25	1899-12-31 18:28:00	2020-11-02	8	1	Light Snow	Cerebral Infarction	1	0	2021-03-10	1	0	1	0	0	1	0	0	0	0	0	1	0	0	114	70	71	20		36.2		2	1	2	0	0		1	0	1	0	1	0
734	Male	84	1	2	2020-11-08	1899-12-31 17:00:00	2020-11-08	1899-12-31 20:38:00	2020-11-16	8	1	Start of winter	Cerebral Infarction	1	0	2022-08-08	1	1	0	1	0	1	0	0	0	0	0	0	0	0	136	72	76	20		36.7	0	1	1	5	0	0		1	0	1	0	0	0
735	Male	69	2	2	2020-11-11	1899-12-31 22:00:00	2020-11-12	1899-12-31 23:03:00	2020-11-19	7	1	Start of winter	Cerebral Infarction	1	0	2022-04-07	1	0	0	0	0	0	0	0	0	0	0	1	0	0	141	79	73	20		36.5	2	3	1	2	0	0		1	0	0	0	0	0
736	Male	61	1	2	2020-11-03	1899-12-31 08:30:00	2020-11-03	1899-12-31 13:02:00	2020-11-09	6	1	Frost's Descent	Small Artery Occlusion Type	1	0	2023-01-04	1	1	1	0	0	0	0	0	0	0	0	0	0	0	136	88	85	20		36.8	8	4	2	3	0	0		0	0	1	0	1	0
737	Male	82	2	2	2020-11-20	1899-12-31 09:50:00	2020-11-30	1899-12-31 11:00:00	2020-12-09	9	1	Start of winter	Cerebral Infarction	1	0	2021-10-19	1	1	0	0	0	1	0	0	0	0	0	1	0	0	140	68	78	20		36.2	20	4	2	4	0	0		1	0	1	0	0	0
738	Male	64	1	2	2020-12-08	1899-12-31 08:00:00	2020-12-08	1899-12-31 09:37:00	2020-12-08	1	1	Major Snow	TIA	3	0	2021-09-10	1	1	1	0	0	0	0	0	0	0	0	0	0	0	169	90	96	19		36.9					0	0		1	0	0	0	0	0
739	Male	66	2	2	2020-12-17	1899-12-31 17:00:00	2020-12-18	1899-12-31 11:34:00	2020-12-22	4	1	Major Snow	Large Artery Atherosclerosis Type	1	0	2021-04-26	2	1	1	0	0	1	0	0	0	0	0	0	1	1	166	88	88	20		36.7	8	4	3	4	0	0		1	0	1	0	1	0
740	Female	67	2	2	2020-12-24	1899-12-31 18:00:00	2020-12-25	1899-12-31 00:08:00	2020-12-31	6	1	Winter Solstice Festival	Cerebral Infarction	1	0	2021-10-19	1	0	1	1	0	1	0	0	0	0	0	1	0	0	168	95	86	20		36.8					0	0		1	0	0	0	1	0
741	Female	65	1	1	2020-11-30	1899-12-31 05:30:00	2020-11-30	1899-12-31 15:29:00	2020-12-07	7	1	Light Snow	Large Artery Atherosclerosis Type	1	0	2023-04-09	1	1	0	0	0	1	0	0	0	0	0	0	0	0	165	86	70	20		36.6	2	1	1	3	0	0		1	0	0	0	1	0
742	Female	74	2	1	2020-12-26	1899-12-31 12:09:00	2020-12-26	1899-12-31 15:36:00	2020-12-31	5	1	Winter Solstice Festival	TIA	3	0	2022-08-06	2	1	0	0	0	1	0	0	0	0	0	0	0	0	147	70	81	20		36.4				4	3	0		1	1	0	0	0	0
743	Male	47	1	1	2020-12-29	1899-12-31 18:00:00	2021-01-01	1899-12-31 16:22:00	2021-01-07	6	1	Winter Solstice Festival	TIA	3	0	2021-10-23	1	1	1	0	0	0	0	0	0	0	0	0	0	0	100	64	115	20		36.9	0	0	1	2	0	0		1	0	1	0	0	0
744	Male	63	2	2	2021-01-05	1899-12-31 05:00:00	2021-01-05	1899-12-31 11:48:00	2021-01-11	6	1	Slight cold	Cerebral Infarction	1	0	2022-10-03	1	1	0	0	0	1	0	0	0	0	0	0	0	0	158	71	88	20		36.8	9	3	1	4	0	0		1	0	0	0	1	0
745	Male	84	1	2	2021-01-08	1899-12-31 10:00:00	2021-01-09	1899-12-31 01:16:00	2021-01-15	6	1	Slight cold	Lacunar Cerebral Infarction	1	0	2021-06-09	1	1	0	1	0	1	0	0	0	0	0	0	1	0	125	76	74	20		36.6				5	0	0		1	0	1	0	1	0
746	Female	80	2	1	2021-01-23	1899-12-31 11:00:00	2021-01-23	1899-12-31 14:21:00	2021-01-31	8	1	Major Cold	Cerebral Infarction	1	0	2023-03-23	1	1	0	1	1	1	0	0	0	0	0	0	0	0	118	70	70	20		36.5	6	3	1	5	0	0		1	0	0	0	0	0
747	Male	73	1	2	2021-01-24	1899-12-31 21:30:00	2021-01-27	1899-12-31 15:52:00	2021-02-02	6	1	Major Cold	Acute cerebral infarction	1	0	2023-03-20	1	1	1	1	1	0	0	0	0	0	0	0	0	0	131	67	110	20		37	4	3	1	5	0	0		1	0	0	0	0	0
748	Male	57	1	2	2021-02-09	1899-12-31 14:00:00	2021-02-09	1899-12-31 18:58:00	2021-02-16	7	1	Start of Spring	Large Artery Atherosclerosis Type	1	0	2021-07-19	1	1	0	0	0	1	0	0	0	0	0	0	0	0	158	92	89	20		36.9	0	1	1	3	0	0		0	0	0	0	1	0
749	Male	76	2	2	2021-02-08	1899-12-31 18:00:00	2021-02-19	1899-12-31 15:38:00	2021-02-25	6	1	Start of Spring	Large Artery Atherosclerosis Type	1	0	2023-02-15	1	0	0	0	0	1	0	0	0	0	0	0	0	0	142	60	81	20		36.8	5	4	3	4	0	0		1	0	0	1	1	0
750	Male	63	2	2	2021-02-27	1899-12-31 08:00:00	2021-03-02	1899-12-31 11:02:00	2021-04-12	39	1	Rain Wate	Large Artery Atherosclerosis Type	1	0	2023-02-22	1	0	0	1	0	1	0	0	0	0	0	1	1	0	144	84	87	20		36.8	16	5	1	3	0	0		1	0	0	0	1	0
751	Male	66	1	2	2020-08-08	1899-12-31 20:00:00	2020-08-09	1899-12-31 23:11:00	2020-10-10	62	1	Start of autumn	Cerebral Infarction	1	0	2023-04-11	1	0	0	0	0	0	0	0	0	0	0	0	0	0	184	90	71	22		36					0	0		0	0	1	0	0	0
752	Female	88	1	2	2021-03-07	1899-12-31 11:30:00	2021-03-07	1899-12-31 15:22:00	2021-03-10	3	1	Awakening of Insects	Acute cerebral infarction	1	0	2021-08-15	1	1	0	1	1	1	0	0	0	0	0	0	0	0	230	149	165	15		36		5			0	0		0	0	0	0	0	0
753	Male	74	1	2	2021-03-01	1899-12-31 10:00:00	2021-03-08	1899-12-31 16:38:00	2021-03-15	7	1	Rain Wate	Cerebral Infarction	1	0	2021-09-04	1	1	0	0	0	0	0	1	0	0	0	0	0	0	131	75	85	20		36.3	6	3	1	4	0	0		1	0	1	0	1	1
754	Male	70	2	2	2021-03-11	1899-12-31 05:50:00	2021-03-14	1899-12-31 10:21:00	2021-03-22	8	1	Awakening of Insects	Large Artery Atherosclerosis Type	1	0	2021-09-10	1	0	0	0	0	1	0	0	0	0	0	1	0	0	137	78	86	20		36.8	1	2	1	4	0	0		1	0	0	0	1	0
755	Male	63	1	2	2021-03-16	1899-12-31 14:00:00	2021-03-18	1899-12-31 10:14:00	2021-03-24	6	1	Awakening of Insects	Large Artery Atherosclerosis Type	1	0	2022-06-08	1	1	1	0	0	0	1	0	0	0	0	0	0	0	142	86	93	20		37.6	6	3	3	5	0	0		1	0	0	0	1	0
756	Male	73	2	2	2021-03-25	1899-12-31 23:00:00	2021-03-28	1899-12-31 09:38:00	2021-04-01	4	1	Vernal Equinox	Large Artery Atherosclerosis Type	1	0	2023-03-07	1	1	0	1	0	1	0	0	0	0	0	0	0	0	154	102	109	20		36.7				4	0	0		1	0	0	0	0	0
757	Male	59	1	2	2021-03-31	1899-12-31 21:00:00	2021-04-01	1899-12-31 19:44:00	2021-04-13	12	1	Vernal Equinox	Acute cerebral infarction	1	0	2021-10-19	1	1	1	0	0	1	0	0	0	0	0	0	0	0	173	90	68	19		36.7	16	5	1	3	0	0		1	0	0	0	0	0
758	Male	71	1	2	2021-04-04	1899-12-31 16:00:00	2021-04-05	1899-12-31 12:16:00	2021-04-10	5	1	Qingming	Lacunar Cerebral Infarction	1	0	2022-03-22	1	1	0	0	0	0	0	0	0	0	0	0	0	0	162	96	84	20		36.4				3	0	0		1	0	1	0	0	0
759	Male	75	1	1	2021-04-11	1899-12-31 10:00:00	2021-04-11	1899-12-31 13:25:00	2021-04-26	16	2	Qingming	Intracerebral Hemorrhage	2	88	2022-06-14	2	1	0	0	0	1	0	0	0	0	1	0	0	0	160	100	104	17		36					0	0		0	0	0	0	0	0
760	Female	69	2	2	2021-04-29	1899-12-31 14:20:00	2021-05-01	1899-12-31 18:08:00	2021-05-15	14	1	Grain Rain	Large Artery Atherosclerosis Type	1	0	2023-03-07	1	1	1	0	0	1	0	0	0	0	0	0	0	0	143	65	85	20		36.4	1	1	1	4	0	0		1	0	1	1	1	0
761	Male	82	2	2	2021-05-12	1899-12-31 13:00:00	2021-05-13	1899-12-31 10:31:00	2021-05-20	7	1	Beginning of Summer	Acute cerebral infarction	1	0	2023-02-23	2	1	0	0	0	0	0	0	0	0	0	0	0	0	156	86	69	20		36.8	1	1	1	4	0	0		1	0	0	0	1	0
762	Male	57	1	2	2021-05-17	1899-12-31 19:00:00	2021-05-18	1899-12-31 09:54:00	2021-05-22	4	1	Beginning of Summer	Acute cerebral infarction	1	0	2021-12-10	1	1	1	0	0	0	0	0	0	0	0	0	0	0	119	77	77	20		36.2	4	2	1	3	0	0		1	0	0	0	1	0
763	Male	65	1	2	2021-05-22	1899-12-31 16:00:00	2021-05-24	1899-12-31 09:29:00	2021-05-30	6	1	Grain Buds	Large Artery Atherosclerosis Type	1	0	2023-01-20	1	1	1	0	0	0	0	0	0	0	0	0	0	0	119	85	98	20		36.3	2	2	1	4	0	0		1	0	0	0	1	0
764	Female	58	1	2	2021-05-25	1899-12-31 01:30:00	2021-05-26	1899-12-31 10:42:00	2021-06-02	7	1	Grain Buds	Cerebral Infarction	1	0	2021-11-30	2	1	0	0	0	0	0	0	0	0	0	0	0	0	132	81	84	21		36.5	1	0	1	2	0	0		1	0	1	0	0	0
765	Male	73	1	2	2020-08-30	1899-12-31 23:30:00	2020-09-01	1899-12-31 20:02:00	2020-09-12	11	1	End of Hea	Cerebral Infarction	1	0	2022-12-27	1	0	1	0	0	0	0	0	0	0	0	0	0	0	136	100	93	20		36					0	0		0	0	0	0	0	0
766	Male	55	2	2	2021-06-15	1899-12-31 07:20:00	2021-06-16	1899-12-31 20:14:00	2021-06-25	9	1	Grain in ear	Large Artery Atherosclerosis Type	1	0	2023-02-28	1	1	0	0	0	0	0	0	0	0	0	1	0	0	158	104	75	20		36.8	7	4	2	2	0	0		1	0	0	0	0	0
767	Male	64	1	2	2021-06-22	1899-12-31 20:00:00	2021-06-23	1899-12-31 00:22:00	2021-06-30	7	1	Summer Solstice	Acute cerebral infarction	1	0	2022-06-06	1	1	1	1	0	1	0	0	0	0	0	0	0	0	156	80	85	20		36.5	1	1	1	5	0	0		1	0	0	0	1	0
768	Female	80	2	2	2021-06-27	1899-12-31 13:00:00	2021-06-29	1899-12-31 15:38:00	2021-07-02	3	1	Summer Solstice	Large Artery Atherosclerosis Type	1	0	2023-04-08	1	1	0	0	0	0	0	0	0	0	0	1	0	0	157	73	65	20		36.5	1	2	1	4	0	0		1	0	1	0	1	0
769	Male	85	1	2	2021-07-10	1899-12-31 19:00:00	2021-07-10	1899-12-31 21:09:00	2021-07-20	10	1	Minor heat	Acute cerebral infarction	1	0	2023-04-12	1	1	0	1	0	1	0	0	0	0	0	0	0	0	134	66	114	30		36					0	0		1	0	1	0	1	0
770	Male	57	1	2	2021-07-18	1899-12-31 18:00:00	2021-07-20	1899-12-31 12:00:00	2021-07-26	6	1	Minor heat	Acute cerebral infarction	1	0	2022-05-18	1	1	0	0	0	1	0	0	0	0	0	0	0	0	145	87	79	20		36.5				2	0	0		1	0	1	0	0	1
771	Male	67	2	2	2021-07-31	1899-12-31 23:15:00	2021-08-02	1899-12-31 16:26:00	2021-08-12	10	1	Great Heat	Cerebral Infarction	1	0	2023-02-23	1	1	0	0	0	1	0	0	1	0	0	1	0	0	168	89	74	20		36.4	2	2	1	3	0	0		1	0	1	0	0	0
772	Male	82	2	2	2021-07-29	1899-12-31 11:20:00	2021-08-04	1899-12-31 12:44:00	2021-08-16	12	1	Great Heat	Large Artery Atherosclerosis Type	1	0	2023-02-23	2	1	0	0	0	1	0	0	1	0	0	0	0	0	175	95	82	20		36.7	6	4	1	6	0	0		1	0	0	0	0	0
773	Male	71	2	2	2021-08-10	1899-12-31 10:00:00	2021-08-12	1899-12-31 08:55:00	2021-08-16	4	1	Start of autumn	Cerebral Infarction	1	0	2023-03-07	1	1	0	0	0	0	0	0	0	0	0	0	0	0	141	82	77	19		36	0	1	1	3	0	0		1	0	0	0	1	0
774	Male	55	1	2	2021-08-14	1899-12-31 10:00:00	2021-08-14	1899-12-31 12:55:00	2021-09-04	21	1	Start of autumn	Large Artery Atherosclerosis Type	1	0	2022-12-14	2	1	0	0	0	1	0	0	0	0	0	1	0	0	164	111	76	25		36	25	5	5		0	0		1	0	1	0	0	0
775	Male	63	2	2	2021-08-14	1899-12-31 05:00:00	2021-08-16	1899-12-31 12:51:00	2021-08-26	10	1	Start of autumn	Acute cerebral infarction	1	0	2022-09-24	1	1	0	1	0	1	0	0	0	0	0	0	1	0	140	83	98	20		36.5	11	4	2	4	0	0		1	0	0	0	0	0
776	Female	68	1	2	2021-08-25	1899-12-31 05:00:00	2021-08-25	1899-12-31 11:45:00	2021-08-30	5	1	End of Hea	Cerebral Infarction	1	0	2022-06-30	1	0	0	0	0	0	0	0	0	0	0	1	0	0	155	91	69	20		36.9				2	0	0		1	0	0	0	0	0
777	Male	61	2	2	2021-09-01	1899-12-31 20:00:00	2021-09-01	1899-12-31 22:49:00	2021-09-09	8	1	End of Hea	Large Artery Atherosclerosis Type	1	0	2022-02-17	1	0	1	0	0	1	0	0	0	0	0	0	0	0	136	75	78	20		36.8	6	4	1	2	0	0		1	1	0	0	1	0
778	Male	70	1	2	2021-09-08	1899-12-31 04:00:00	2021-09-08	1899-12-31 08:23:00	2021-09-13	5	1	White dew	Cerebral Infarction	1	0	2022-03-22	1	1	0	0	0	1	0	0	0	0	0	0	0	0	145	78	85	20		36.7				3	0	0		0	0	1	0	1	0
779	Male	78	2	2	2021-09-06	1899-12-31 14:00:00	2021-09-08	1899-12-31 16:03:00	2021-09-18	10	1	End of Hea	Large Artery Atherosclerosis Type	1	0	2022-03-05	1	1	0	0	0	1	0	0	0	0	0	0	0	0	169	89	81	19		36	6	2	4		0	0		1	0	0	0	0	1
780	Male	56	1	2	2021-10-07	1899-12-31 10:00:00	2021-10-07	1899-12-31 14:28:00	2021-10-13	6	1	Autumn equinox	Large Artery Atherosclerosis Type	1	0	2022-04-20	1	1	0	0	0	1	0	0	0	0	0	0	0	0	158	76	70	20		36.3	1	1	1	3	0	0		0	0	1	0	1	0
781	Male	75	2	2	2021-10-07	1899-12-31 12:00:00	2021-10-08	1899-12-31 16:58:00	2021-10-20	12	1	Autumn equinox	Large Artery Atherosclerosis Type	1	0	2022-06-30	1	0	0	0	0	1	0	0	0	0	0	0	0	0	141	77	69	20		36.3	6	2	2	3	0	0		1	0	1	1	1	0
782	Female	69	2	2	2021-10-09	1899-12-31 01:41:00	2021-10-11	1899-12-31 11:20:00	2021-10-27	16	1	Cold dew	Cerebral Infarction	1	0	2021-12-22	2	1	0	0	0	1	0	0	0	0	0	0	0	0	150	86	80	20		36.5				3	0	0		1	0	0	0	0	0
783	Male	61	1	2	2021-10-12	1899-12-31 01:00:00	2021-10-14	1899-12-31 18:41:00	2021-10-22	8	1	Cold dew	Cerebral Infarction	1	0	2023-04-07	1	1	0	0	0	1	0	0	0	0	0	0	0	0	193	114	88	19		36.5				2	0	0		0	0	0	0	1	0
784	Female	73	2	2	2021-10-26	1899-12-31 08:00:00	2021-10-27	1899-12-31 10:48:00	2021-11-02	6	1	Frost's Descent	Cerebral Infarction	1	0	2022-05-27	1	1	1	0	0	1	0	0	0	0	0	0	0	0	149	69	94	20		36.4					0	0		1	0	1	0	1	0
785	Male	70	1	2	2021-11-06	1899-12-31 01:30:00	2021-11-06	1899-12-31 03:40:00	2021-11-10	4	1	Frost's Descent	Lacunar Cerebral Infarction	1	0	2023-02-28	1	1	0	0	0	1	0	0	0	0	0	0	0	0	196	90	97	20		36.6		2	3	4	0	0		1	0	1	0	0	0
786	Female	69	1	2	2021-11-15	1899-12-31 12:00:00	2021-11-20	1899-12-31 15:04:00	2021-12-22	32	2	Start of winter	Large Artery Atherosclerosis Type	1	0	2022-10-06	1	1	0	0	0	1	0	0	0	0	0	0	0	0	117	68	72	20		36.5	15	5	3		0	0		1	1	0	0	0	0
787	Female	60	1	2	2021-11-20	1899-12-31 17:00:00	2021-11-20	1899-12-31 19:03:00	2021-11-25	5	1	Start of winter	Cerebral Infarction	1	0	2022-06-09	1	0	0	0	1	1	1	0	1	0	0	1	0	0	117	69	60	20		36.2	3	3	1	1	0	0		1	0	0	0	1	0
788	Male	82	1	2	2021-11-23	1899-12-31 16:00:00	2021-11-23	1899-12-31 20:02:00	2021-12-12	19	2	Light Snow	Intracerebral Hemorrhage	2	190	2023-04-02	1	1	1	1	1	1	0	0	0	0	0	0	0	0	188	94	135	30		36					0	0		1	0	0	0	0	0
789	Male	32	1	2	2021-11-25	1899-12-31 13:00:00	2021-11-30	1899-12-31 10:12:00	2021-12-04	4	1	Light Snow	Unclear cause	1	0	2022-12-19	1	0	0	0	0	1	0	0	0	0	0	1	0	0	120	80	89	20		36.5	0	1	1	1	0	0		0	0	0	0	0	0
790	Female	44	1	2	2021-11-22	1899-12-31 21:00:00	2021-11-30	1899-12-31 01:12:00	2021-11-30	30	2	Light Snow	Intracerebral Hemorrhage	2	0	2022-09-29	1	1	0	0	0	0	1	0	0	0	0	0	0	0	126	57	138	12		38.5					0	0		0	0	0	0	0	0
791	Female	75	1	2	2021-12-17	1899-12-31 09:00:00	2021-12-21	1899-12-31 08:10:00	2021-12-25	5	1	Major Snow	Cerebral Infarction	1	0	2022-12-26	1	1	0	0	0	1	0	0	0	0	0	1	0	0	151	73	75	20		36	2	2	1	2	0	0		1	0	1	0	1	0
792	Male	64	1	2	2021-12-21	1899-12-31 06:00:00	2021-12-23	1899-12-31 09:14:00	2021-12-29	6	1	Winter Solstice Festival	Cerebral Infarction	1	0	2022-07-27	1	1	0	0	0	1	0	0	0	0	0	1	0	0	164	98	84	20		36	1	1	1	3	0	0		1	0	0	0	0	0
793	Female	64	2	2	2022-01-02	1899-12-31 10:00:00	2022-01-03	1899-12-31 10:16:00	2022-01-07	4	1	Winter Solstice Festival	Cerebral Infarction	1	0	2023-03-22	1	1	0	0	0	1	1	0	0	1	0	0	0	0	125	61	65	20		36.5				2	0	0		0	0	1	0	0	0
794	Female	78	2	2	2022-01-01	1899-12-31 11:00:00	2022-01-03	1899-12-31 21:25:00	2022-01-10	7	1	Winter Solstice Festival	Cerebral Infarction	1	0	2022-08-11	1	1	1	1	1	1	0	0	0	0	1	0	1	0	134	83	83	20		36.8	1	2	1	6	0	0		1	0	1	0	1	0
795	Female	74	2	2	2022-01-02	1899-12-31 23:00:00	2022-01-04	1899-12-31 19:29:00	2022-01-11	7	1	Winter Solstice Festival	Cerebral Infarction	1	0	2023-02-13	1	1	0	0	0	1	0	0	0	0	0	0	0	0	118	60	90	21		37.5	13	4	4	3	0	6		0	1	0	0	0	0
796	Female	87	2	2	2022-01-07	1899-12-31 14:00:00	2022-01-07	1899-12-31 16:53:00	2022-01-14	7	1	Slight cold	Large Artery Atherosclerosis Type	1	0	2023-04-08	1	1	1	1	0	1	0	0	0	0	0	0	0	0	145	87	81	25		36.5					0	0		1	0	1	0	1	0
797	Male	56	2	2	2022-02-22	1899-12-31 23:30:00	2022-02-23	1899-12-31 09:11:00	2022-03-01	6	1	Rain Wate	Cerebral Infarction	1	0	2023-04-07	1	1	0	0	0	1	0	0	0	0	0	0	0	0	142	77	79	21		36.2	1	0	1	3	0	0		0	0	1	0	1	0
798	Male	92	2	2	2022-01-10	1899-12-31 11:30:00	2022-01-13	1899-12-31 19:18:00	2022-01-17	5	1	Slight cold	Cerebral Infarction	1	0	2023-03-15	1	1	0	0	1	1	0	0	0	0	0	0	0	0	125	72	88	20		36.5	3	2	1	5	0	0		1	0	0	0	0	0
799	Female	73	2	2	2022-01-14	1899-12-31 11:15:00	2022-01-14	1899-12-31 13:37:00	2022-01-21	7	1	Slight cold	Cerebral Infarction	1	0	2023-01-04	1	1	1	0	0	1	0	0	0	0	0	0	0	0	132	68	108	21		36.7	1		1	3	0	0		1	0	0	0	0	0
800	Female	60	1	2	2022-01-17	1899-12-31 10:00:00	2022-01-17	1899-12-31 13:05:00	2022-01-26	9	1	Slight cold	Cardioembolic Type	1	0	2023-03-05	1	0	0	0	1	1	1	0	1	0	0	1	0	0	123	63	61	20		36.2	4	9	3	2	0	3		1	0	0	0	1	0
801	Male	70	1	2	2022-01-21	1899-12-31 03:00:00	2022-01-21	1899-12-31 11:52:00	2021-01-26	5	1	Major Cold	Cerebral Infarction	1	0	2023-02-20	1	1	0	0	0	1	0	0	0	0	0	0	1	0	161	83	82	20		37.2	11	4	2	4	0	0		1	0	1	0	0	0
802	Male	84	1	2	2022-01-22	1899-12-31 18:00:00	2022-01-23	1899-12-31 12:10:00	2022-01-29	6	1	Major Cold	Acute cerebral infarction	1	0	2023-02-28	1	1	0	0	0	1	0	0	0	0	0	0	0	0	151	72	93	20		36.4	2	1	1	2	0	0		0	0	0	0	0	1
803	Male	57	2	2	2022-01-24	1899-12-31 01:00:00	2022-01-24	1899-12-31 11:54:00	2022-01-29	5	1	Major Cold	Cerebral Infarction	1	0	2022-11-09	1	0	0	0	0	1	0	0	0	0	0	0	0	0	138	83	56	20		36.5	4	3	1	1	0	0		1	0	0	0	1	0
804	Female	56	2	2	2022-01-25	1899-12-31 12:00:00	2022-01-25	1899-12-31 20:14:00	2022-01-31	6	1	Major Cold	Cardioembolic Type	1	0	2023-03-15	1	0	0	0	0	1	0	0	0	0	0	0	0	0	138	76	75	20		36.6	13	4	1	2	0	0		1	0	0	0	0	0
805	Male	87	1	2	2022-02-09	1899-12-31 16:30:00	2022-02-10	1899-12-31 09:58:00	2022-02-17	7	1	Start of Spring	Cerebral Infarction	1	0	2023-02-23	2	1	0	0	0	1	0	0	0	0	0	0	0	0	135	89	95	20		36.5				4	0	0		1	0	1	1	0	0
806	Male	71	1	2	2022-02-13	1899-12-31 10:00:00	2022-02-13	1899-12-31 16:53:00	2022-02-24	11	1	Start of Spring	Acute cerebral infarction	1	0	2023-02-28	1	0	0	0	0	1	0	0	0	0	0	0	0	0	145	91	67	20		36.5	5	4	1	4	0	0		0	0	0	0	0	1
807	Male	56	1	2	2022-02-16	1899-12-31 09:00:00	2022-02-23	1899-12-31 09:11:00	2022-03-01	6	1	Start of Spring	Cerebral Infarction	1	0	2023-03-06	1	0	0	0	0	1	0	0	0	0	0	0	0	0	142	77	79	21		36.2	1	0	1	3	0	0		0	0	1	0	1	0
808	Male	57	1	2	2022-02-22	1899-12-31 22:00:00	2022-02-25	1899-12-31 15:06:00	2022-03-05	8	1	Rain Wate	Cerebral Infarction	1	0	2023-04-02	1	1	0	0	0	1	0	0	0	0	0	0	0	0	150	95	99	20		36.1	5	0	1	2	0	0		0	0	1	0	1	0
809	Male	63	2	2	2022-02-28	1899-12-31 16:00:00	2022-03-01	1899-12-31 14:36:00	2022-03-09	8	1	Rain Wate	Acute cerebral infarction	1	0	2021-07-28	2	1	1	0	0	1	0	0	0	0	0	0	0	0	135	86	70	20		36.5	2	2	1	4	0	0		1	0	1	0	1	0
810	Female	51	2	1	2022-03-02	1899-12-31 14:30:00	2022-03-03	1899-12-31 20:07:00	2022-03-11	8	1	Rain Wate	Large Artery Atherosclerosis Type	1	0	2021-07-28	2	0	0	1	0	1	0	0	0	0	0	1	0	0	113	70	70	20		37	3	1	1	3	0	0		0	1	0	1	0	0
811	Female	75	1	2	2022-03-13	1899-12-31 06:30:00	2022-03-13	1899-12-31 09:36:00	2022-06-08	87	1	Awakening of Insects	Intracerebral Hemorrhage	2	0	2023-02-02	1	0	0	0	0	0	1	0	0	0	0	0	0	0	180	81	119	18		36	0	0	0	0	0	0		0	0	0	0	0	0
812	Female	56	2	2	2022-04-06	1899-12-31 23:45:00	2022-04-07	1899-12-31 11:47:00	2022-04-27	20	1	Qingming	Cardioembolic Type	1	0	2023-02-02	1	0	0	0	0	1	0	0	0	0	0	0	0	0	153	98	74	20		36.3	20	5			0	0		1	0	0	0	0	0
813	Male	83	2	1	2022-04-20	1899-12-31 14:00:00	2022-04-20	1899-12-31 19:25:00	2022-04-26	6	1	Grain Rain	Cerebral Infarction	1	0	2023-02-02	1	1	0	0	0	1	0	0	1	0	0	0	0	0	165	95	95	20		38.5	6	4	1	5	0	0		1	0	1	0	0	0
814	Female	68	1	2	2022-05-14	1899-12-31 21:00:00	2022-05-14	1899-12-31 22:23:00	2022-06-12	29	1	Beginning of Summer	Acute cerebral infarction	1	0	2020-04-22	1	0	0	0	1	1	0	0	0	0	0	1	0	0	107	63	78	18		36.1				3	0	5		1	0	0	0	0	0
815	Female	93	1	2	2022-05-15	1899-12-31 06:00:00	2022-05-16	1899-12-31 08:16:00	2022-05-23	7	1	Beginning of Summer	Acute cerebral infarction	1	0	2020-03-10	1	1	0	1	1	1	0	0	0	0	0	0	0	0	155	75	78	20		36.5	11	4		4	0	0		1	0	0	0	0	0
816	Male	72	1	2	2022-05-16	1899-12-31 21:00:00	2022-05-18	1899-12-31 10:41:00	2022-05-27	9	1	Beginning of Summer	Large Artery Atherosclerosis Type	1	0	2023-04-17	1	1	1	0	0	1	0	0	0	0	0	0	0	0	183	110	75	20		36	1	3	3	5	0	0		1	0	1	0	1	0
817	Male	65	1	2	2022-05-24	1899-12-31 07:00:00	2022-05-27	1899-12-31 09:49:00	2022-06-02	6	1	Grain Buds	Cerebral Infarction	1	0	2020-02-03	1	1	0	0	0	1	0	0	0	0	0	1	0	0	121	75	81	20		36				3	0	0		1	0	0	0	0	0
818	Male	74	2	2	2022-06-01	1899-12-31 10:00:00	2022-06-05	1899-12-31 20:38:00	2022-06-10	5	1	Grain Buds	Cerebral Infarction	1	0	2020-03-13	1	1	0	1	0	1	0	0	0	0	0	0	0	0	123	76	67	20		37					0	0		0	0	1	0	1	0
819	Male	75	1	2	2022-06-04	1899-12-31 22:00:00	2022-06-07	1899-12-31 10:48:00	2022-06-09	3	1	Grain Buds	Cerebral Infarction	1	0	2023-03-16	1	1	1	1	0	1	0	0	0	0	0	0	0	0	187	112	70	20		36.3					0	0		1	0	0	0	1	0
820	Male	64	2	2	2022-06-20	1899-12-31 11:00:00	2022-06-21	1899-12-31 10:18:00	2022-06-27	6	1	Grain in ear	Large Artery Atherosclerosis Type	1	0	2022-12-06	1	1	1	0	0	1	0	0	0	0	0	0	0	0	146	89	74	19		36.2	0	0	0	4	0	0		1	0	0	0	1	0
821	Female	66	2	2	2022-06-22	1899-12-31 09:00:00	2022-06-22	1899-12-31 18:55:00	2022-09-09	79	1	Summer Solstice	Intracerebral Hemorrhage	2	5	2020-02-09	1	1	0	0	0	1	1	0	0	0	0	0	0	0	162	86	88	20		36.5					0	0		1	0	1	0	1	0
822	Male	32	1	1	2022-07-10	1899-12-31 23:00:00	2022-07-11	1899-12-31 01:37:00	2022-07-17	6	1	Minor heat	Intracerebral Hemorrhage	2	2	2021-01-11	1	1	0	0	0	1	0	0	0	0	0	1	0	0	170	88	109	22		37					0	0		1	0	0	0	0	0
823	Male	71	1	1	2022-07-13	1899-12-31 06:30:00	2022-07-13	1899-12-31 08:09:00	2022-07-22	9	1	Minor heat	Large Artery Atherosclerosis Type	1	0	2022-01-19	1	1	1	0	1	1	0	0	0	0	0	1	0	0	136	74	98	20		36.6	17	4	1	4	0	0		0	1	0	0	0	0
824	Male	68	2	1	2022-07-15	1899-12-31 23:40:00	2022-07-18	1899-12-31 16:48:00	2022-07-25	7	1	Minor heat	Small Artery Occlusion Type	1	0	2021-09-04	1	1	1	0	0	1	0	0	0	0	0	1	0	0	157	104	81	20		36.4	7	3	1	4	0	0		1	0	0	0	1	0
825	Male	77	1	2	2022-07-20	1899-12-31 05:30:00	2022-07-20	1899-12-31 07:05:00	2022-07-27	7	1	Minor heat	Large Artery Atherosclerosis Type	1	0	2023-01-20	1	1	0	1	0	1	1	0	0	0	0	0	0	0	145	75	75	20		36.8	4	3	1	5	0	0		1	0	1	0	0	0
826	Female	82	1	2	2022-07-29	1899-12-31 04:00:00	2022-07-29	1899-12-31 06:00:00	2022-08-05	7	1	Great Heat	Cerebral Infarction	1	0	2023-02-28	1	1	1	1	1	1	0	0	0	0	0	0	0	0	104	66	75	20		36.7				6	0	0		1	0	0	0	0	0
827	Male	74	1	2	2022-08-06	1899-12-31 05:00:00	2022-08-06	1899-12-31 10:53:00	2022-08-11	5	1	Great Heat	TIA	3	0	2021-10-20	1	1	0	0	0	1	0	0	0	0	0	0	0	0	158	92	92	20		36.5	1				7	0		1	0	0	1	0	0
828	Male	63	1	2	2022-08-12	1899-12-31 20:00:00	2022-08-12	1899-12-31 23:10:00	2022-08-14	2	1	Start of autumn	TIA	3	0	2022-03-22	1	1	1	1	0	1	0	0	0	0	0	0	0	0	135	85	78	20		36.5	1	2	1		7	0		1	0	0	0	1	0
829	Female	79	2	2	2022-08-16	1899-12-31 15:00:00	2022-08-16	1899-12-31 20:20:00	2022-09-15	31	1	Start of autumn	Acute cerebral infarction	1	0	2022-03-22	1	1	1	1	1	1	0	0	0	0	1	0	0	0	125	70	96	20		36.9	16	6	4	5	0	0		1	1	0	0	0	0
830	Male	66	2	2	2022-09-05	1899-12-31 21:00:00	2022-09-08	1899-12-31 09:47:00	2022-09-17	10	1	End of Hea	TIA	3	0	2022-05-18	1	0	0	0	0	1	0	0	0	0	0	0	0	0	164	90	72	20		36.9					0	0		1	0	0	0	1	0
831	Female	74	1	1	2022-09-25	1899-12-31 16:00:00	2022-09-26	1899-12-31 09:04:00	2022-10-04	8	1	Autumn equinox	Cerebral Infarction	1	0	2021-11-02	1	1	0	1	0	1	0	0	0	0	0	0	0	0	124	77	88	20		36.5				4	0	4		1	0	0	0	1	0
832	Male	74	2	2	2022-10-08	1899-12-31 10:00:00	2022-10-08	1899-12-31 15:29:00	2022-10-14	6	1	Cold dew	Small Artery Occlusion Type	1	0	2022-01-14	1	1	0	1	0	1	0	0	0	0	0	0	0	0	150	91	116	21		36.6	5	4	2	5	0	0		1	0	1	0	0	0
833	Male	64	1	1	2022-12-04	1899-12-31 20:00:00	2022-12-04	1899-12-31 22:26:00	2022-12-06	2	1	Light Snow	Intracerebral Hemorrhage	2	162	2021-11-03	2	1	0	0	0	0	1	0	0	0	0	0	1	1	181	100	86	15		36.6					0	0		0	0	0	0	0	0
834	Male	59	2	2	2022-12-11	1899-12-31 16:00:00	2022-12-11	1899-12-31 16:30:00	2022-12-19	9	1	Major Snow	Intracerebral Hemorrhage	2	3	2022-12-14	2	1	0	0	0	0	1	0	0	0	0	0	0	0	151	90	64	20		36.3					0	0		0	0	0	0	0	0
835	Female	76	1	1	2022-12-18	1899-12-31 17:50:00	2022-12-20	1899-12-31 16:21:00	2022-12-27	7	1	Major Snow	Lacunar Cerebral Infarction	1	0	2023-04-08	1	1	0	0	0	0	0	0	0	0	0	1	0	0	113	57	86	20		36.5					0	0		1	0	1	0	1	0
836	Male	72	1	2	2022-12-20	1899-12-31 05:00:00	2022-12-21	1899-12-31 11:40:00	2022-12-26	5	1	Major Snow	Cerebral Infarction	1	0	2023-04-02	1	1	0	1	0	0	0	0	0	0	0	0	0	0	124	78	102	20		37.7	2	1	1	2	0	0		1	0	0	0	0	0
837	Female	61	1	1	2023-02-19	1899-12-31 01:00:00	2023-02-19	1899-12-31 15:37:00	2023-02-19	5	2	Rain Wate	Cardioembolic Type	1	0	2022-08-06	2	0	0	0	1	1	1	0	1	0	0	1	0	0	110	64	65	20		36.8	9	4	2		0	5		1	0	0	0	1	0
838	Female	82	2	1	2023-02-17	1899-12-31 06:00:00	2023-02-20	1899-12-31 13:46:00	2023-02-28	8	1	Start of Spring	Large Artery Atherosclerosis Type	1	0	2021-12-13	1	1	1	0	0	1	0	0	0	0	0	1	0	0	149	80	78	20		36.3	4	4	1	4	0	0		1	0	0	0	1	0
839	Female	70	2	1	2023-02-27	1899-12-31 10:00:00	2023-02-28	1899-12-31 11:00:00	2023-03-10	10	1	Rain Wate	Cerebral Infarction	1	0	2023-04-09	1	1	1	0	0	1	0	0	0	0	0	0	0	0	153	90	105	21		36.6	1	1	1	4	0	0		1	0	0	0	0	0
840	Male	64	2	2	2023-02-27	1899-12-31 17:00:00	2023-03-01	1899-12-31 10:53:00	2023-03-06	5	1	Rain Wate	Cerebral Infarction	1	0	2023-03-02	1	1	0	0	0	0	0	0	0	0	0	0	0	0	148	85	83	20		36.2	3	1	1	3	0	0		1	0	0	0	1	0
841	Male	65	2	1	2023-03-26	1899-12-31 12:00:00	2023-03-27	1899-12-31 09:59:00	2023-04-02	7	1	Vernal Equinox	Large Artery Atherosclerosis Type	1	0	2023-02-23	1	1	0	0	0	1	0	0	0	0	0	0	0	0	150	88	78	20		36.5	9	3	2	6	0	0		1	0	0	1	0	0
842	Female	75	1	1	2023-03-27	1899-12-31 16:00:00	2023-03-28	1899-12-31 23:01:00	2023-04-02	5	1	Vernal Equinox	Cerebral Infarction	1	0	2022-07-01	1	1	1	0	0	0	0	0	0	0	0	0	0	0	165	88	94	20		36.2	8	4	3	6	0	0		1	0	0	0	0	0
843	Male	61	1	2	2021-10-12	1899-12-31 10:00:00	2121-10-14	1899-12-31 18:41:00	2021-10-22	8	1	Cold dew	Cerebral Infarction	1	0	2023-04-02	1	1	0	0	0	0	0	0	0	0	0	0	1	0	193	114	88	19		36.5				2	0	0		0	0	0	0	1	0
[truncated: 59 more columns]
